# Supplementary material for: 2,2,3,3,3-Pentafluoro-1-propanol and its dimer: structural diversity, conformational conversion, and tunnelling motion
Source: Royal Society of Chemistry journal article supplement (doi:10.1039/d2cp01895k), 2022-01-01
Supplement: d2cp01895k1.pdf [file d2cp01895k1.pdf]

## 2,2,3,3,3-pentafluoro-1-propanol and its dimers: structural diversity, conformational conversion, and tunneling motion

Bowei Wu,<sup>a</sup> Nathan A. Seifert,<sup>a,b</sup> Aran Insausti,<sup>a,c,d</sup> Jiarui Ma,<sup>a</sup> Sönke Oswald,<sup>a,e</sup> Wolfgang Jäger<sup>a</sup> and Yunjie Xu<sup>a\*</sup>

<sup>a</sup>Department of Chemistry, University of Alberta, 11227 Saskatchewan Drive, Edmonton, AB, Canada.

<sup>b</sup>Chemistry and Chemical & Biomedical Engineering Department, University of New Haven, 300 Boston Post Rd, West Haven, CT, 06516, USA.

<sup>c</sup>Departamento de Química Física, Universidad del País Vasco (UPV/EHU) Barrio Sarriena s/n, Leioa, Spain.

<sup>d</sup>Instituto Biofisika (UPV/EHU, CSIC) Barrio Sarriena s/n, Leioa, Spain.

<sup>e</sup>Institut für Physikalische Chemie, Georg-August-Universität Göttingen, 37077 Göttingen, Germany.

\* Corresponding Author, Email: yunjie.xu@ualberta.ca, Fax: 1-780-492-8231

### Contents

|                                                                                                                     |         |
|---------------------------------------------------------------------------------------------------------------------|---------|
| <b>Point S1.</b> Gaussian keywords used in the calculations.....                                                    | S2      |
| <b>Figure S1.</b> Experimental spectra of <b>PFPG+g+/G-g-</b> and its isotopologues species.....                    | S2      |
| <b>Table S1-S7.</b> Transition frequencies of <b>PFPG+g+/G-g-</b> and its isotopologues and <b>PFPTg+/Tg-</b> ..... | S3-S11  |
| <b>Figure S2.</b> Experimental spectra of the <b>PFPTg+/Tg-</b> monomer.....                                        | S12     |
| <b>Figure S3.</b> Conformational interconversion barrier of the <b>PFP</b> conformers.....                          | S13     |
| <b>Table S8-S10.</b> Kraitchnam and STRFIT results of <b>PFPG+g+/G-g-</b> .....                                     | S14     |
| <b>Table S11-S13.</b> The semi-experimental equilibrium structural parameters of <b>PFPG+g+/G-g-</b> .....          | S15     |
| <b>Table S14.</b> Spectroscopic properties of the predicted binary PFP conformers.....                              | S16-S18 |
| <b>Table S15-S19.</b> Rotational transition frequencies of the five binary PFP conformers.....                      | S18-S56 |
| <b>Figure S4.</b> QTAIM and NCI analyses of the five PFP and PrOH conformers.....                                   | S57     |
| <b>Figure S5.</b> QTAIM and NCI analyses of the five binary PFP conformers.....                                     | S58     |
| Completion of reference 24.....                                                                                     | S59     |

**Point S1.** Gaussian keywords used in the calculations.

| Calculations            | Employed keywords                                                                                                                                                      |
|-------------------------|------------------------------------------------------------------------------------------------------------------------------------------------------------------------|
| Geometry optimization   | Freq, fopt=(verytight,MaxCycles=200),<br>int=SuperFine; empiricaldispersion=gd3bj                                                                                      |
| Harmonic calculation    | Freq=(VCD,VibRot), or Freq=(savenormalmodes,VibRot)<br>B3LYP, Def2-QZVP, empiricaldispersion=gd3bj;<br>PBE1PBE, Def2-TZVPD, empiricaldispersion=gd3bj;<br>MP2, cc-pVTZ |
| Anharmonic calculations | Freq=Anharmonic, fopt=tight, int=SuperFine (for TZVP);<br>and fopt=verytight, (for QZVP)                                                                               |
| Transition calculation  | opt=(calcall,ts,noeigentest), scf=verytight,<br>int=grid=SuperFine                                                                                                     |
| Rigid PES scan          | scan                                                                                                                                                                   |
| BSSE correction         | density=current, counterpoise=2                                                                                                                                        |
| Common keywords         | output=picket                                                                                                                                                          |

The G16 optimized geometry files for the five PFP monomeric conformers and ten binary PFP conformers are provided as a zip file.

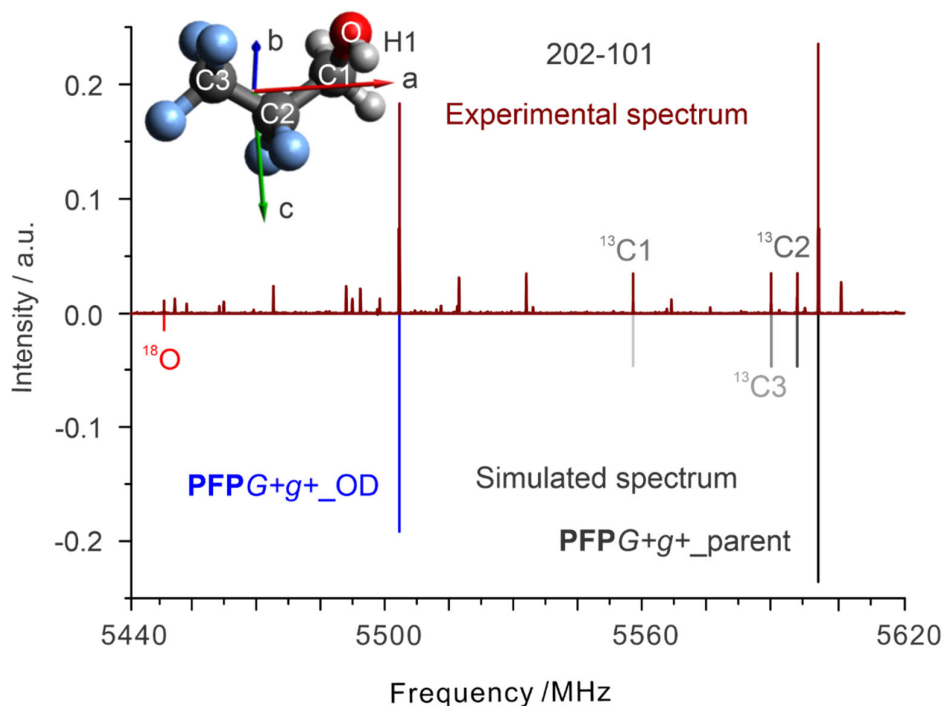

**Figure S1.** Experimental spectra of the **PFPG+g+/PFPG-g-** monomer and isotopologues species of its 2,0,2-1,0,1 transition of the PFP+D<sub>2</sub>O mixture in the Ne atmosphere. The experimental spectroscopic constants, the calculated electric dipole moment components and a rotational temperature of 0.5 K were used for the spectral simulations. The experimental spectra were recorded by averaging about 900 k free induction decays.

**Table S1.** Rotational transition frequencies of the parent **PFPG+g+** monomer.

| $J'$ | $K_a'$ | $K_c'$ | $J''$ | $K_a''$ | $K_c''$ | Obs/ MHz  | Cal/ MHz  | Obs - Cal/ MHz |
|------|--------|--------|-------|---------|---------|-----------|-----------|----------------|
| 4    | 1      | 3      | 4     | 1       | 4       | 2118.1766 | 2118.1757 | 0.0009         |
| 4    | 1      | 3      | 4     | 0       | 4       | 2234.4507 | 2234.4470 | 0.0037         |
| 2    | 2      | 1      | 2     | 1       | 2       | 2343.7751 | 2343.7759 | -0.0008        |
| 5    | 3      | 2      | 5     | 2       | 3       | 2669.1246 | 2669.1171 | 0.0075         |
| 3    | 2      | 2      | 3     | 1       | 3       | 2698.7252 | 2698.7308 | -0.0056        |
| 2    | 2      | 1      | 2     | 0       | 2       | 2742.2867 | 2742.2813 | 0.0054         |
| 1    | 0      | 1      | 0     | 0       | 0       | 2827.3625 | 2827.3649 | -0.0024        |
| 4    | 3      | 2      | 4     | 2       | 2       | 2875.5745 | 2875.5743 | 0.0002         |
| 4    | 3      | 1      | 4     | 2       | 2       | 2929.1759 | 2929.1783 | -0.0024        |
| 3    | 2      | 2      | 3     | 0       | 3       | 2932.0002 | 2931.9996 | 0.0006         |
| 3    | 2      | 1      | 3     | 1       | 3       | 2940.0504 | 2940.0449 | 0.0055         |
| 5    | 1      | 4      | 5     | 1       | 5       | 3057.9251 | 3057.9234 | 0.0017         |
| 5    | 1      | 4      | 5     | 0       | 5       | 3109.7134 | 3109.7116 | 0.0018         |
| 3    | 3      | 1      | 3     | 2       | 1       | 3151.2002 | 3151.1982 | 0.0020         |
| 3    | 3      | 0      | 3     | 2       | 1       | 3159.1253 | 3159.1271 | -0.0018        |
| 4    | 2      | 3      | 4     | 1       | 4       | 3176.1133 | 3176.1103 | 0.0030         |
| 4    | 2      | 3      | 4     | 0       | 4       | 3292.3845 | 3292.3816 | 0.0029         |
| 7    | 2      | 5      | 7     | 1       | 6       | 3323.4127 | 3323.4166 | -0.0039        |
| 1    | 1      | 1      | 0     | 0       | 0       | 3391.4452 | 3391.4460 | -0.0008        |
| 3    | 3      | 1      | 3     | 2       | 2       | 3392.5119 | 3392.5124 | -0.0005        |
| 3    | 3      | 0      | 3     | 2       | 2       | 3400.4417 | 3400.4413 | 0.0004         |
| 8    | 4      | 4      | 8     | 3       | 5       | 3504.7134 | 3504.7115 | 0.0019         |
| 4    | 3      | 2      | 4     | 2       | 3       | 3516.9767 | 3516.9731 | 0.0036         |
| 4    | 3      | 1      | 4     | 2       | 3       | 3570.5764 | 3570.5771 | -0.0007        |
| 1    | 1      | 0      | 0     | 0       | 0       | 3608.6252 | 3608.6251 | 0.0001         |
| 5    | 3      | 3      | 5     | 2       | 4       | 3741.7379 | 3741.7370 | 0.0009         |
| 5    | 2      | 4      | 5     | 1       | 5       | 3765.1378 | 3765.1347 | 0.0031         |
| 7    | 4      | 3      | 7     | 3       | 4       | 3852.1488 | 3852.1447 | 0.0041         |
| 6    | 1      | 5      | 6     | 1       | 6       | 4031.1306 | 4031.1310 | -0.0004        |
| 6    | 1      | 5      | 6     | 0       | 6       | 4052.5756 | 4052.5796 | -0.0040        |
| 6    | 4      | 2      | 6     | 3       | 3       | 4199.5003 | 4199.4997 | 0.0006         |
| 5    | 4      | 2      | 5     | 3       | 2       | 4440.3648 | 4440.3667 | -0.0019        |
| 6    | 2      | 5      | 6     | 1       | 6       | 4445.0748 | 4445.0748 | 0.0000         |
| 5    | 4      | 1      | 5     | 3       | 2       | 4449.2129 | 4449.2107 | 0.0022         |
| 6    | 2      | 5      | 6     | 0       | 6       | 4466.5241 | 4466.5234 | 0.0007         |
| 4    | 3      | 2      | 4     | 1       | 3       | 4574.9098 | 4574.9077 | 0.0021         |
| 4    | 4      | 1      | 4     | 3       | 1       | 4582.8165 | 4582.8174 | -0.0009        |

|    |   |    |    |   |    |           |           |         |
|----|---|----|----|---|----|-----------|-----------|---------|
| 4  | 4 | 0  | 4  | 3 | 1  | 4583.8245 | 4583.8225 | 0.0020  |
| 4  | 4 | 1  | 4  | 3 | 2  | 4636.4252 | 4636.4213 | 0.0039  |
| 4  | 4 | 0  | 4  | 3 | 2  | 4637.4252 | 4637.4265 | -0.0013 |
| 5  | 4 | 2  | 5  | 3 | 3  | 4639.9873 | 4639.9885 | -0.0012 |
| 5  | 4 | 1  | 5  | 3 | 3  | 4648.8374 | 4648.8325 | 0.0049  |
| 6  | 4 | 3  | 6  | 3 | 4  | 4685.3709 | 4685.3729 | -0.0020 |
| 3  | 3 | 1  | 3  | 1 | 2  | 4796.0998 | 4796.1013 | -0.0015 |
| 2  | 0 | 2  | 1  | 1 | 0  | 4821.8646 | 4821.8626 | 0.0020  |
| 7  | 1 | 6  | 7  | 0 | 7  | 4984.0842 | 4984.0838 | 0.0004  |
| 2  | 0 | 2  | 1  | 1 | 1  | 5039.0416 | 5039.0417 | -0.0001 |
| 7  | 2 | 6  | 7  | 1 | 7  | 5190.2748 | 5190.2741 | 0.0007  |
| 7  | 2 | 6  | 7  | 0 | 7  | 5198.7375 | 5198.7372 | 0.0003  |
| 9  | 2 | 7  | 9  | 1 | 8  | 5298.6371 | 5298.6385 | -0.0014 |
| 2  | 1 | 2  | 1  | 1 | 1  | 5437.5501 | 5437.5471 | 0.0030  |
| 3  | 0 | 3  | 2  | 2 | 0  | 5498.4876 | 5498.4794 | 0.0082  |
| 2  | 0 | 2  | 1  | 0 | 1  | 5603.1252 | 5603.1228 | 0.0024  |
| 16 | 7 | 10 | 16 | 6 | 10 | 5607.0499 | 5607.0505 | -0.0006 |
| 3  | 1 | 3  | 2  | 2 | 0  | 5731.7499 | 5731.7482 | 0.0017  |
| 7  | 5 | 2  | 7  | 4 | 3  | 5744.0115 | 5744.0109 | 0.0006  |
| 3  | 1 | 3  | 2  | 2 | 1  | 5783.3512 | 5783.3501 | 0.0011  |
| 2  | 1 | 1  | 1  | 1 | 0  | 5871.9007 | 5871.9045 | -0.0038 |
| 6  | 5 | 2  | 6  | 4 | 2  | 5872.9503 | 5872.9495 | 0.0008  |
| 6  | 5 | 1  | 6  | 4 | 2  | 5874.1992 | 5874.1928 | 0.0064  |
| 7  | 5 | 3  | 7  | 4 | 4  | 5882.1009 | 5882.1059 | -0.0050 |
| 6  | 5 | 2  | 6  | 4 | 3  | 5915.4113 | 5915.4108 | 0.0005  |
| 6  | 5 | 1  | 6  | 4 | 3  | 5916.6501 | 5916.6541 | -0.0040 |
| 5  | 5 | 1  | 5  | 4 | 2  | 5948.6377 | 5948.6388 | -0.0011 |
| 5  | 5 | 0  | 5  | 4 | 2  | 5948.7518 | 5948.7538 | -0.0020 |
| 2  | 1 | 2  | 1  | 0 | 1  | 6001.6258 | 6001.6282 | -0.0024 |
| 3  | 3 | 0  | 3  | 1 | 3  | 6099.1759 | 6099.1720 | 0.0039  |
| 2  | 1 | 1  | 1  | 0 | 1  | 6653.1624 | 6653.1647 | -0.0023 |
| 3  | 1 | 2  | 2  | 2 | 1  | 7078.5005 | 7078.4920 | 0.0085  |
| 2  | 2 | 1  | 1  | 1 | 0  | 7564.1377 | 7564.1439 | -0.0062 |
| 2  | 2 | 1  | 1  | 1 | 1  | 7781.3249 | 7781.3230 | 0.0019  |
| 2  | 2 | 0  | 1  | 1 | 1  | 7832.9249 | 7832.9250 | -0.0001 |
| 3  | 0 | 3  | 2  | 1 | 2  | 7893.8624 | 7893.8572 | 0.0052  |
| 3  | 1 | 3  | 2  | 1 | 2  | 8127.1255 | 8127.1261 | -0.0006 |
| 3  | 0 | 3  | 2  | 0 | 2  | 8292.3626 | 8292.3627 | -0.0001 |
| 3  | 1 | 3  | 2  | 0 | 2  | 8525.6366 | 8525.6315 | 0.0051  |
| 3  | 2 | 1  | 2  | 2 | 0  | 8671.7874 | 8671.7931 | -0.0057 |

|   |   |   |   |   |   |            |            |         |
|---|---|---|---|---|---|------------|------------|---------|
| 3 | 1 | 2 | 2 | 1 | 1 | 8770.7373  | 8770.7314  | 0.0059  |
| 3 | 2 | 2 | 2 | 1 | 1 | 10174.3128 | 10174.3204 | -0.0076 |
| 4 | 1 | 3 | 3 | 2 | 2 | 10210.7759 | 10210.7678 | 0.0081  |
| 4 | 1 | 4 | 3 | 1 | 3 | 10791.3235 | 10791.3229 | 0.0006  |
| 4 | 0 | 4 | 3 | 0 | 3 | 10908.3154 | 10908.3204 | -0.0050 |
| 4 | 1 | 4 | 3 | 0 | 3 | 11024.5874 | 11024.5917 | -0.0043 |
| 3 | 2 | 1 | 2 | 1 | 2 | 11067.1631 | 11067.1710 | -0.0079 |
| 4 | 2 | 3 | 3 | 2 | 2 | 11268.7021 | 11268.7024 | -0.0003 |
| 4 | 3 | 2 | 3 | 3 | 1 | 11393.1709 | 11393.1632 | 0.0077  |
| 4 | 3 | 1 | 3 | 3 | 0 | 11438.8359 | 11438.8382 | -0.0023 |
| 3 | 2 | 1 | 2 | 0 | 2 | 11465.6751 | 11465.6764 | -0.0013 |
| 4 | 1 | 3 | 3 | 1 | 2 | 11614.3506 | 11614.3567 | -0.0061 |
| 4 | 2 | 2 | 3 | 2 | 1 | 11668.7858 | 11668.7870 | -0.0012 |
| 3 | 3 | 1 | 2 | 2 | 0 | 11822.9882 | 11822.9913 | -0.0031 |
| 3 | 3 | 0 | 2 | 2 | 1 | 11882.5215 | 11882.5222 | -0.0007 |

**Table S2.** Rotational transition frequencies of the  $^{13}\text{C1}$  PFPG+g+ monomer.

| $J'$ | $K_a'$ | $K_c'$ | $J''$ | $K_a''$ | $K_c''$ | Obs/ MHz   | Cal/ MHz   | Obs - Cal/ MHz |
|------|--------|--------|-------|---------|---------|------------|------------|----------------|
| 1    | 0      | 1      | 0     | 0       | 0       | 2821.5499  | 2821.5462  | 0.0037         |
| 2    | 0      | 2      | 1     | 1       | 1       | 5025.3692  | 5025.3719  | -0.0027        |
| 2    | 0      | 2      | 1     | 0       | 1       | 5591.8859  | 5591.8897  | -0.0038        |
| 2    | 1      | 2      | 1     | 1       | 1       | 5426.4317  | 5426.4331  | -0.0014        |
| 2    | 1      | 1      | 1     | 1       | 0       | 5859.7439  | 5859.7426  | 0.0013         |
| 3    | 1      | 3      | 2     | 1       | 2       | 8110.6692  | 8110.6716  | -0.0024        |
| 3    | 0      | 3      | 2     | 0       | 2       | 8276.2352  | 8276.2370  | -0.0018        |
| 3    | 2      | 2      | 2     | 2       | 1       | 8464.6249  | 8464.6220  | 0.0029         |
| 3    | 2      | 1      | 2     | 2       | 0       | 8653.0074  | 8653.0022  | 0.0052         |
| 3    | 1      | 2      | 2     | 1       | 1       | 8752.8158  | 8752.8132  | 0.0026         |
| 2    | 1      | 2      | 1     | 0       | 1       | 5992.9497  | 5992.9509  | -0.0012        |
| 1    | 1      | 1      | 0     | 0       | 0       | 3388.0637  | 3388.0640  | -0.0003        |
| 4    | 1      | 4      | 3     | 1       | 3       | 10769.6749 | 10769.6654 | 0.0095         |
| 4    | 0      | 4      | 3     | 0       | 3       | 10887.3503 | 10887.3543 | -0.0040        |
| 4    | 2      | 3      | 3     | 2       | 2       | 11245.7507 | 11245.7536 | -0.0029        |
| 4    | 1      | 3      | 3     | 1       | 2       | 11591.2039 | 11591.2043 | -0.0004        |
| 4    | 2      | 2      | 3     | 2       | 1       | 11643.5418 | 11643.5450 | -0.0032        |
| 4    | 3      | 2      | 3     | 3       | 1       | 11369.3098 | 11369.3063 | 0.0035         |
| 4    | 3      | 1      | 3     | 3       | 0       | 11414.3763 | 11414.3807 | -0.0044        |

**Table S3.** Rotational transition frequencies of the  $^{13}\text{C}_2$  PFPG+g+ monomer.

| $J'$ | $K_a'$ | $K_c'$ | $J''$ | $K_a''$ | $K_c''$ | Obs/ MHz   | Cal/ MHz   | Obs - Cal/ MHz |
|------|--------|--------|-------|---------|---------|------------|------------|----------------|
| 1    | 0      | 1      | 0     | 0       | 0       | 2821.5499  | 2821.5462  | 0.0037         |
| 1    | 1      | 1      | 0     | 0       | 0       | 3388.0637  | 3388.0646  | -0.0009        |
| 2    | 0      | 2      | 1     | 1       | 1       | 5025.3692  | 5025.3712  | -0.0020        |
| 2    | 1      | 2      | 1     | 1       | 1       | 5426.4317  | 5426.4332  | -0.0015        |
| 2    | 0      | 2      | 1     | 0       | 1       | 5591.8859  | 5591.8897  | -0.0038        |
| 2    | 1      | 1      | 1     | 1       | 0       | 5859.7439  | 5859.7424  | 0.0015         |
| 2    | 1      | 2      | 1     | 0       | 1       | 5992.9497  | 5992.9517  | -0.0020        |
| 3    | 1      | 3      | 2     | 1       | 2       | 8110.6692  | 8110.6720  | -0.0028        |
| 3    | 0      | 3      | 2     | 0       | 2       | 8276.2352  | 8276.2373  | -0.0021        |
| 3    | 2      | 2      | 2     | 2       | 1       | 8464.6249  | 8464.6199  | 0.0050         |
| 3    | 2      | 1      | 2     | 2       | 0       | 8653.0074  | 8653.0040  | 0.0034         |
| 3    | 1      | 2      | 2     | 1       | 1       | 8752.8158  | 8752.8125  | 0.0033         |
| 4    | 1      | 4      | 3     | 1       | 3       | 10769.6749 | 10769.6672 | 0.0077         |
| 4    | 0      | 4      | 3     | 0       | 3       | 10887.3503 | 10887.3560 | -0.0057        |
| 4    | 2      | 3      | 3     | 2       | 2       | 11245.7507 | 11245.7481 | 0.0026         |
| 4    | 3      | 2      | 3     | 3       | 1       | 11369.3098 | 11369.3053 | 0.0045         |
| 4    | 3      | 1      | 3     | 3       | 0       | 11414.3763 | 11414.3834 | -0.0071        |
| 4    | 1      | 3      | 3     | 1       | 2       | 11591.2039 | 11591.2014 | 0.0025         |
| 4    | 2      | 2      | 3     | 2       | 1       | 11643.5418 | 11643.5482 | -0.0064        |

**Table S4.** Rotational transition frequencies of the  $^{13}\text{C}_3$  PFPG+g+ monomer.

| $J'$ | $K_a'$ | $K_c'$ | $J''$ | $K_a''$ | $K_c''$ | Obs/ MHz   | Cal/ MHz   | Obs - Cal/ MHz |
|------|--------|--------|-------|---------|---------|------------|------------|----------------|
| 1    | 0      | 1      | 0     | 0       | 0       | 2803.8751  | 2803.8736  | 0.0015         |
| 4    | 2      | 3      | 4     | 0       | 4       | 3294.7262  | 3294.7250  | 0.0012         |
| 2    | 0      | 2      | 1     | 1       | 1       | 4984.5821  | 4984.5749  | 0.0072         |
| 2    | 1      | 2      | 1     | 1       | 1       | 5395.8754  | 5395.8762  | -0.0008        |
| 2    | 0      | 2      | 1     | 0       | 1       | 5559.1334  | 5559.1362  | -0.0028        |
| 2    | 1      | 1      | 1     | 1       | 0       | 5819.6126  | 5819.6100  | 0.0026         |
| 3    | 1      | 3      | 2     | 1       | 2       | 8066.2327  | 8066.2370  | -0.0043        |
| 3    | 0      | 3      | 2     | 0       | 2       | 8231.9672  | 8231.9752  | -0.0080        |
| 3    | 2      | 2      | 2     | 2       | 1       | 8411.6093  | 8411.6038  | 0.0055         |
| 3    | 2      | 1      | 2     | 2       | 0       | 8591.2359  | 8591.2341  | 0.0018         |
| 3    | 1      | 2      | 2     | 1       | 1       | 8694.6374  | 8694.6407  | -0.0033        |
| 4    | 1      | 4      | 3     | 1       | 3       | 10712.3142 | 10712.3188 | -0.0046        |

|   |   |   |   |   |   |            |            |         |
|---|---|---|---|---|---|------------|------------|---------|
| 4 | 0 | 4 | 3 | 0 | 3 | 10832.6252 | 10832.6183 | 0.0069  |
| 4 | 2 | 3 | 3 | 2 | 2 | 11177.1461 | 11177.1363 | 0.0098  |
| 4 | 3 | 2 | 3 | 3 | 1 | 11294.8546 | 11294.8569 | -0.0023 |
| 4 | 3 | 1 | 3 | 3 | 0 | 11336.4269 | 11336.4306 | -0.0037 |
| 4 | 1 | 3 | 3 | 1 | 2 | 11518.2085 | 11518.2068 | 0.0017  |
| 4 | 2 | 2 | 3 | 2 | 1 | 11559.0900 | 11559.0952 | -0.0052 |

**Table S5.** Rotational transition frequencies of the  $^{18}\text{O}$  PFPG+g+ monomer.

| $J'$ | $K_a'$ | $K_c'$ | $J''$ | $K_a''$ | $K_c''$ | Obs/ MHz   | Cal/ MHz   | Obs - Cal/ MHz |
|------|--------|--------|-------|---------|---------|------------|------------|----------------|
| 1    | 0      | 1      | 0     | 0       | 0       | 2748.4296  | 2748.4297  | -0.0001        |
| 2    | 1      | 2      | 1     | 1       | 1       | 5282.6485  | 5282.6530  | -0.0045        |
| 2    | 0      | 2      | 1     | 0       | 1       | 5447.9456  | 5447.9479  | -0.0023        |
| 2    | 1      | 1      | 1     | 1       | 0       | 5711.0621  | 5711.0589  | 0.0032         |
| 2    | 1      | 2      | 1     | 0       | 1       | 5866.9892  | 5866.9912  | -0.0020        |
| 3    | 1      | 3      | 2     | 1       | 2       | 7896.2145  | 7896.2196  | -0.0051        |
| 3    | 0      | 3      | 2     | 0       | 2       | 8064.4076  | 8064.4088  | -0.0012        |
| 3    | 2      | 2      | 2     | 2       | 1       | 8245.2788  | 8245.2747  | 0.0041         |
| 3    | 2      | 1      | 2     | 2       | 0       | 8426.1497  | 8426.1421  | 0.0076         |
| 3    | 1      | 2      | 2     | 1       | 1       | 8531.6242  | 8531.6232  | 0.0010         |
| 4    | 1      | 4      | 3     | 1       | 3       | 10485.3052 | 10485.3058 | -0.0006        |
| 4    | 0      | 4      | 3     | 0       | 3       | 10607.8009 | 10607.7935 | 0.0074         |
| 4    | 2      | 3      | 3     | 2       | 2       | 10955.1228 | 10955.1252 | -0.0024        |
| 4    | 2      | 2      | 3     | 2       | 1       | 11340.1359 | 11340.1423 | -0.0064        |

**Table S6.** Rotational transition frequencies of PFPG+g+ (OD) monomer.

| $J'$ | $K_a'$ | $K_c'$ | $J''$ | $K_a''$ | $K_c''$ | Obs/ MHz  | Cal/ MHz  | Obs - Cal/ MHz |
|------|--------|--------|-------|---------|---------|-----------|-----------|----------------|
| 1    | 0      | 1      | 0     | 0       | 0       | 2775.4753 | 2775.4718 | 0.0035         |
| 2    | 2      | 1      | 2     | 0       | 2       | 2792.4624 | 2792.4586 | 0.0038         |
| 3    | 2      | 2      | 3     | 0       | 3       | 2967.4377 | 2967.4336 | 0.0041         |
| 5    | 1      | 4      | 5     | 1       | 5       | 2970.0485 | 2970.0515 | -0.0030        |
| 4    | 3      | 1      | 4     | 2       | 2       | 3023.6855 | 3023.6874 | -0.0019        |
| 4    | 2      | 3      | 4     | 1       | 4       | 3174.2238 | 3174.2185 | 0.0053         |
| 3    | 3      | 0      | 3     | 2       | 1       | 3243.0107 | 3243.0098 | 0.0009         |
| 4    | 2      | 3      | 4     | 0       | 4       | 3304.6794 | 3304.6782 | 0.0012         |

|   |   |   |   |   |   |            |            |         |
|---|---|---|---|---|---|------------|------------|---------|
| 1 | 1 | 1 | 0 | 0 | 0 | 3356.9505  | 3356.9566  | -0.0061 |
| 3 | 3 | 1 | 3 | 2 | 2 | 3458.3393  | 3458.3375  | 0.0018  |
| 1 | 1 | 0 | 0 | 0 | 0 | 3566.6067  | 3566.6074  | -0.0007 |
| 4 | 3 | 2 | 4 | 2 | 3 | 3572.9503  | 3572.9555  | -0.0052 |
| 5 | 2 | 4 | 5 | 1 | 5 | 3742.9258  | 3742.9273  | -0.0015 |
| 5 | 3 | 3 | 5 | 2 | 4 | 3781.2447  | 3781.2479  | -0.0032 |
| 5 | 2 | 4 | 5 | 0 | 5 | 3803.1582  | 3803.1566  | 0.0016  |
| 6 | 1 | 5 | 6 | 1 | 6 | 3933.5895  | 3933.5924  | -0.0029 |
| 5 | 3 | 3 | 5 | 1 | 4 | 4554.1207  | 4554.1236  | -0.0029 |
| 4 | 4 | 0 | 4 | 3 | 1 | 4691.3615  | 4691.3578  | 0.0037  |
| 4 | 3 | 2 | 4 | 1 | 3 | 4697.1863  | 4697.1925  | -0.0062 |
| 2 | 0 | 2 | 1 | 1 | 0 | 4712.5872  | 4712.5826  | 0.0046  |
| 4 | 4 | 1 | 4 | 3 | 2 | 4737.0556  | 4737.0518  | 0.0038  |
| 5 | 4 | 2 | 5 | 3 | 3 | 4737.8015  | 4737.7989  | 0.0026  |
| 2 | 0 | 2 | 1 | 1 | 1 | 4922.2332  | 4922.2334  | -0.0002 |
| 2 | 1 | 2 | 1 | 1 | 1 | 5341.2953  | 5341.2910  | 0.0043  |
| 2 | 0 | 2 | 1 | 0 | 1 | 5503.7124  | 5503.7182  | -0.0058 |
| 2 | 1 | 1 | 1 | 1 | 0 | 5760.5932  | 5760.5918  | 0.0014  |
| 2 | 1 | 2 | 1 | 0 | 1 | 5922.7751  | 5922.7757  | -0.0006 |
| 2 | 2 | 1 | 1 | 1 | 0 | 7505.0417  | 7505.0412  | 0.0005  |
| 3 | 1 | 3 | 2 | 1 | 2 | 7985.1005  | 7985.1069  | -0.0064 |
| 3 | 0 | 3 | 2 | 0 | 2 | 8151.4335  | 8151.4363  | -0.0028 |
| 3 | 2 | 2 | 2 | 2 | 1 | 8326.4173  | 8326.4113  | 0.0060  |
| 3 | 2 | 1 | 2 | 2 | 0 | 8501.3749  | 8501.3722  | 0.0027  |
| 3 | 1 | 2 | 2 | 1 | 1 | 8607.2001  | 8607.2022  | -0.0021 |
| 4 | 1 | 4 | 3 | 1 | 3 | 10605.1499 | 10605.1507 | -0.0008 |
| 4 | 0 | 4 | 3 | 0 | 3 | 10727.4135 | 10727.4192 | -0.0057 |
| 4 | 2 | 3 | 3 | 2 | 2 | 11064.6656 | 11064.6638 | 0.0018  |
| 4 | 3 | 2 | 3 | 3 | 1 | 11179.2853 | 11179.2818 | 0.0035  |
| 4 | 1 | 3 | 3 | 1 | 2 | 11404.0869 | 11404.0852 | 0.0017  |



**Table S7.** Rotational transition frequencies of the **PFPTg+** monomer. The ground state is noted as “0” and “1” for the excited states.

| $J'$ | $K_a'$ | $K_c'$ | stat | $J''$ | $K_a''$ | $K_c''$ | stat | Obs/ MHz  | Cal/ MHz  | Obs - Cal/ MHz |
|------|--------|--------|------|-------|---------|---------|------|-----------|-----------|----------------|
| 1    | 0      | 1      | 0    | 0     | 0       | 0       | 0    | 2436.3895 | 2436.4022 | -0.0127        |
| 5    | 0      | 5      | 0    | 4     | 1       | 3       | 1    | 2962.0498 | 2962.0471 | 0.0027         |
| 4    | 2      | 3      | 0    | 3     | 3       | 0       | 0    | 3077.6048 | 3077.6022 | 0.0026         |
| 4    | 2      | 2      | 0    | 3     | 3       | 1       | 0    | 3091.8937 | 3091.8950 | -0.0013        |
| 6    | 1      | 6      | 1    | 6     | 2       | 4       | 0    | 3167.1012 | 3167.1018 | -0.0006        |
| 3    | 1      | 3      | 0    | 2     | 2       | 0       | 0    | 3184.6473 | 3184.6494 | -0.0021        |
| 3    | 1      | 3      | 1    | 2     | 2       | 0       | 1    | 3185.6693 | 3185.6715 | -0.0022        |
| 6    | 1      | 5      | 0    | 5     | 2       | 3       | 1    | 3318.5042 | 3318.5020 | 0.0023         |
| 5    | 1      | 5      | 1    | 5     | 2       | 3       | 0    | 3319.1439 | 3319.1410 | 0.0029         |
| 3    | 1      | 2      | 0    | 2     | 2       | 1       | 0    | 3428.0946 | 3428.0945 | 0.0001         |
| 3    | 1      | 3      | 1    | 3     | 2       | 1       | 0    | 3526.1166 | 3526.1152 | 0.0014         |
| 2    | 0      | 2      | 0    | 1     | 1       | 1       | 0    | 3558.1396 | 3558.1380 | 0.0016         |
| 2    | 0      | 2      | 1    | 1     | 1       | 1       | 1    | 3558.3332 | 3558.3305 | 0.0027         |
| 2    | 1      | 2      | 1    | 2     | 2       | 0       | 0    | 3589.3117 | 3589.3089 | 0.0028         |
| 3    | 2      | 1      | 0    | 2     | 1       | 1       | 1    | 3601.2569 | 3601.2576 | -0.0007        |
| 4    | 1      | 3      | 0    | 3     | 0       | 3       | 1    | 3630.8305 | 3630.8301 | 0.0004         |
| 1    | 1      | 1      | 0    | 0     | 0       | 0       | 0    | 3750.1398 | 3750.1432 | -0.0034        |
| 1    | 1      | 1      | 1    | 0     | 0       | 0       | 1    | 3750.1398 | 3750.1357 | 0.0041         |
| 4    | 2      | 2      | 0    | 4     | 1       | 3       | 0    | 3813.3126 | 3813.3087 | 0.0039         |
| 4    | 2      | 2      | 1    | 4     | 1       | 3       | 1    | 3828.0002 | 3828.0003 | -0.0001        |
| 3    | 2      | 1      | 0    | 3     | 1       | 2       | 0    | 3884.7715 | 3884.7721 | -0.0006        |
| 3    | 2      | 1      | 1    | 3     | 1       | 2       | 1    | 3891.0456 | 3891.0462 | -0.0006        |
| 2    | 2      | 0      | 1    | 2     | 1       | 1       | 1    | 3941.7009 | 3941.7013 | -0.0004        |
| 2    | 2      | 0      | 0    | 2     | 1       | 1       | 0    | 3941.9003 | 3941.9019 | -0.0016        |
| 5    | 1      | 4      | 1    | 5     | 2       | 4       | 0    | 3958.0753 | 3958.0807 | -0.0054        |
| 2    | 2      | 1      | 0    | 2     | 1       | 2       | 0    | 4062.2089 | 4062.2098 | -0.0009        |
| 6    | 1      | 5      | 1    | 6     | 2       | 5       | 0    | 4080.1371 | 4080.1357 | 0.0014         |
| 3    | 2      | 2      | 0    | 3     | 1       | 3       | 0    | 4122.5122 | 4122.5106 | 0.0016         |
| 3    | 2      | 2      | 1    | 3     | 1       | 3       | 1    | 4129.1326 | 4129.1313 | 0.0013         |
| 1    | 1      | 0      | 1    | 2     | 0       | 2       | 0    | 4134.2127 | 4134.2086 | 0.0041         |
| 4    | 2      | 3      | 0    | 4     | 1       | 4       | 0    | 4203.1221 | 4203.1189 | 0.0032         |
| 4    | 2      | 3      | 1    | 4     | 1       | 4       | 1    | 4218.7051 | 4218.7041 | 0.0010         |
| 2    | 2      | 0      | 1    | 3     | 1       | 2       | 0    | 4225.2147 | 4225.2158 | -0.0011        |
| 5    | 2      | 4      | 0    | 5     | 1       | 5       | 0    | 4304.1645 | 4304.1626 | 0.0019         |
| 5    | 2      | 4      | 1    | 5     | 1       | 5       | 1    | 4331.0607 | 4331.0597 | 0.0010         |
| 5    | 5      | 0      | 0    | 5     | 4       | 2       | 1    | 4364.9799 | 4364.9798 | 0.0001         |
| 5    | 5      | 1      | 0    | 5     | 4       | 1       | 1    | 4364.9799 | 4364.9784 | 0.0015         |

|   |   |   |   |   |   |   |   |           |           |         |
|---|---|---|---|---|---|---|---|-----------|-----------|---------|
| 8 | 1 | 7 | 1 | 8 | 2 | 7 | 0 | 4381.2747 | 4381.2740 | 0.0007  |
| 6 | 2 | 5 | 0 | 6 | 1 | 6 | 0 | 4425.7402 | 4425.7385 | 0.0017  |
| 7 | 2 | 6 | 0 | 7 | 1 | 7 | 0 | 4567.8628 | 4567.8671 | -0.0043 |
| 2 | 1 | 2 | 0 | 1 | 1 | 1 | 0 | 4832.2625 | 4832.2619 | 0.0006  |
| 2 | 1 | 2 | 1 | 1 | 1 | 1 | 1 | 4832.8413 | 4832.8409 | 0.0004  |
| 2 | 0 | 2 | 0 | 1 | 0 | 1 | 0 | 4871.8797 | 4871.8790 | 0.0007  |
| 2 | 0 | 2 | 1 | 1 | 0 | 1 | 1 | 4872.0127 | 4872.0094 | 0.0033  |
| 2 | 1 | 1 | 0 | 1 | 1 | 0 | 0 | 4913.0999 | 4913.1003 | -0.0004 |
| 2 | 1 | 1 | 1 | 1 | 1 | 0 | 1 | 4913.7369 | 4913.7341 | 0.0028  |
| 6 | 0 | 6 | 0 | 5 | 1 | 4 | 1 | 5268.5113 | 5268.5143 | -0.0030 |
| 5 | 2 | 4 | 0 | 4 | 3 | 1 | 0 | 5516.7739 | 5516.7716 | 0.0024  |
| 4 | 1 | 4 | 1 | 3 | 2 | 1 | 1 | 5530.3004 | 5530.3031 | -0.0027 |
| 4 | 1 | 4 | 0 | 3 | 2 | 1 | 0 | 5535.4219 | 5535.4139 | 0.0080  |
| 5 | 2 | 3 | 0 | 4 | 3 | 2 | 0 | 5550.2375 | 5550.2418 | -0.0043 |
| 4 | 1 | 3 | 0 | 3 | 2 | 2 | 0 | 5944.2252 | 5944.2251 | 0.0001  |
| 4 | 2 | 2 | 0 | 3 | 1 | 2 | 1 | 5984.0328 | 5984.0340 | -0.0012 |
| 3 | 0 | 3 | 1 | 2 | 1 | 2 | 1 | 6031.2382 | 6031.2462 | -0.0080 |
| 3 | 0 | 3 | 0 | 2 | 1 | 2 | 0 | 6031.3855 | 6031.3837 | 0.0018  |
| 2 | 1 | 2 | 0 | 1 | 0 | 1 | 0 | 6146.0007 | 6146.0029 | -0.0022 |
| 2 | 1 | 2 | 1 | 1 | 0 | 1 | 1 | 6146.5181 | 6146.5198 | -0.0017 |
| 5 | 1 | 4 | 0 | 4 | 0 | 4 | 1 | 6172.4253 | 6172.4255 | -0.0002 |
| 4 | 2 | 3 | 0 | 3 | 1 | 3 | 1 | 6212.4183 | 6212.4175 | 0.0008  |
| 3 | 3 | 0 | 0 | 2 | 2 | 0 | 1 | 6320.4875 | 6320.4868 | 0.0007  |
| 3 | 3 | 1 | 0 | 2 | 2 | 1 | 1 | 6321.3562 | 6321.3563 | -0.0001 |
| 1 | 0 | 1 | 1 | 1 | 1 | 1 | 0 | 6338.2127 | 6338.2123 | 0.0004  |
| 2 | 0 | 2 | 1 | 2 | 1 | 2 | 0 | 6377.9626 | 6377.9598 | 0.0028  |
| 3 | 0 | 3 | 1 | 3 | 1 | 3 | 0 | 6435.9016 | 6435.9057 | -0.0041 |
| 4 | 0 | 4 | 1 | 4 | 1 | 4 | 0 | 6510.0377 | 6510.0383 | -0.0006 |
| 6 | 3 | 3 | 0 | 6 | 2 | 4 | 0 | 6592.3502 | 6592.3471 | 0.0031  |
| 5 | 0 | 5 | 1 | 5 | 1 | 5 | 0 | 6597.7049 | 6597.7033 | 0.0016  |
| 5 | 3 | 2 | 1 | 5 | 2 | 3 | 1 | 6601.6811 | 6601.6790 | 0.0021  |
| 5 | 3 | 2 | 0 | 5 | 2 | 3 | 0 | 6624.6394 | 6624.6415 | -0.0021 |
| 4 | 3 | 1 | 1 | 4 | 2 | 2 | 1 | 6635.6835 | 6635.6827 | 0.0008  |
| 4 | 3 | 1 | 0 | 4 | 2 | 2 | 0 | 6646.7004 | 6646.6990 | 0.0014  |
| 4 | 3 | 2 | 1 | 4 | 2 | 3 | 1 | 6649.0732 | 6649.0734 | -0.0002 |
| 5 | 3 | 3 | 0 | 5 | 2 | 4 | 0 | 6656.5402 | 6656.5463 | -0.0061 |
| 3 | 3 | 0 | 1 | 3 | 2 | 1 | 1 | 6659.5035 | 6659.5069 | -0.0034 |
| 4 | 3 | 2 | 0 | 4 | 2 | 3 | 0 | 6660.6243 | 6660.6242 | 0.0001  |
| 3 | 3 | 0 | 0 | 3 | 2 | 1 | 0 | 6660.9304 | 6660.9305 | -0.0001 |
| 3 | 3 | 1 | 1 | 3 | 2 | 2 | 1 | 6664.0365 | 6664.0384 | -0.0019 |

|   |   |   |   |   |   |   |   |           |            |         |
|---|---|---|---|---|---|---|---|-----------|------------|---------|
| 3 | 3 | 1 | 0 | 3 | 2 | 2 | 0 | 6665.6372 | 6665.6388  | -0.0016 |
| 6 | 0 | 6 | 1 | 6 | 1 | 6 | 0 | 6695.6826 | 6695.6826  | 0.0000  |
| 7 | 0 | 7 | 1 | 7 | 1 | 7 | 0 | 6800.3514 | 6800.3507  | 0.0007  |
| 3 | 1 | 3 | 0 | 2 | 1 | 2 | 0 | 7247.8108 | 7247.8107  | 0.0001  |
| 3 | 1 | 3 | 1 | 2 | 1 | 2 | 1 | 7248.7242 | 7248.7215  | 0.0027  |
| 3 | 0 | 3 | 0 | 2 | 0 | 2 | 0 | 7305.5082 | 7305.5076  | 0.0006  |
| 3 | 0 | 3 | 1 | 2 | 0 | 2 | 1 | 7305.7547 | 7305.7565  | -0.0018 |
| 3 | 2 | 2 | 0 | 2 | 2 | 1 | 0 | 7308.1116 | 7308.1115  | 0.0001  |
| 3 | 2 | 1 | 0 | 2 | 2 | 0 | 0 | 7311.9151 | 7311.9151  | 0.0000  |
| 4 | 0 | 4 | 0 | 3 | 1 | 3 | 0 | 8519.9516 | 8519.9538  | -0.0022 |
| 3 | 1 | 3 | 0 | 2 | 0 | 2 | 0 | 8521.9333 | 8521.9346  | -0.0013 |
| 2 | 2 | 1 | 0 | 1 | 1 | 0 | 0 | 8854.0524 | 8854.0506  | 0.0018  |
| 2 | 2 | 1 | 1 | 1 | 1 | 0 | 1 | 8854.5206 | 8854.5190  | 0.0016  |
| 3 | 1 | 3 | 1 | 3 | 0 | 3 | 0 | 8869.8096 | 8869.8080  | 0.0016  |
| 2 | 2 | 0 | 0 | 1 | 1 | 1 | 0 | 8895.4214 | 8895.4232  | -0.0018 |
| 2 | 2 | 0 | 1 | 1 | 1 | 1 | 1 | 8895.8941 | 8895.8908  | 0.0033  |
| 2 | 1 | 2 | 1 | 2 | 0 | 2 | 0 | 8926.5913 | 8926.5941  | -0.0028 |
| 1 | 1 | 1 | 1 | 1 | 0 | 1 | 0 | 8965.6325 | 8965.6322  | 0.0003  |
| 4 | 1 | 4 | 0 | 3 | 1 | 3 | 0 | 9662.6775 | 9662.6796  | -0.0021 |
| 4 | 1 | 4 | 0 | 3 | 0 | 3 | 0 | 10879.103 | 10879.1066 | -0.0028 |
| 5 | 0 | 5 | 0 | 4 | 1 | 4 | 0 | 11020.911 | 11020.9116 | -0.0002 |
| 2 | 0 | 2 | 1 | 1 | 1 | 0 | 0 | 11169.800 | 11169.8007 | -0.0006 |
| 3 | 2 | 2 | 0 | 2 | 1 | 1 | 0 | 11249.063 | 11249.0618 | 0.0017  |
| 3 | 2 | 2 | 1 | 2 | 1 | 1 | 1 | 11256.503 | 11256.5041 | -0.0007 |
| 3 | 2 | 1 | 0 | 2 | 1 | 2 | 0 | 11375.082 | 11375.0764 | 0.0064  |
| 1 | 1 | 0 | 1 | 0 | 0 | 0 | 0 | 11442.486 | 11442.4898 | -0.0030 |

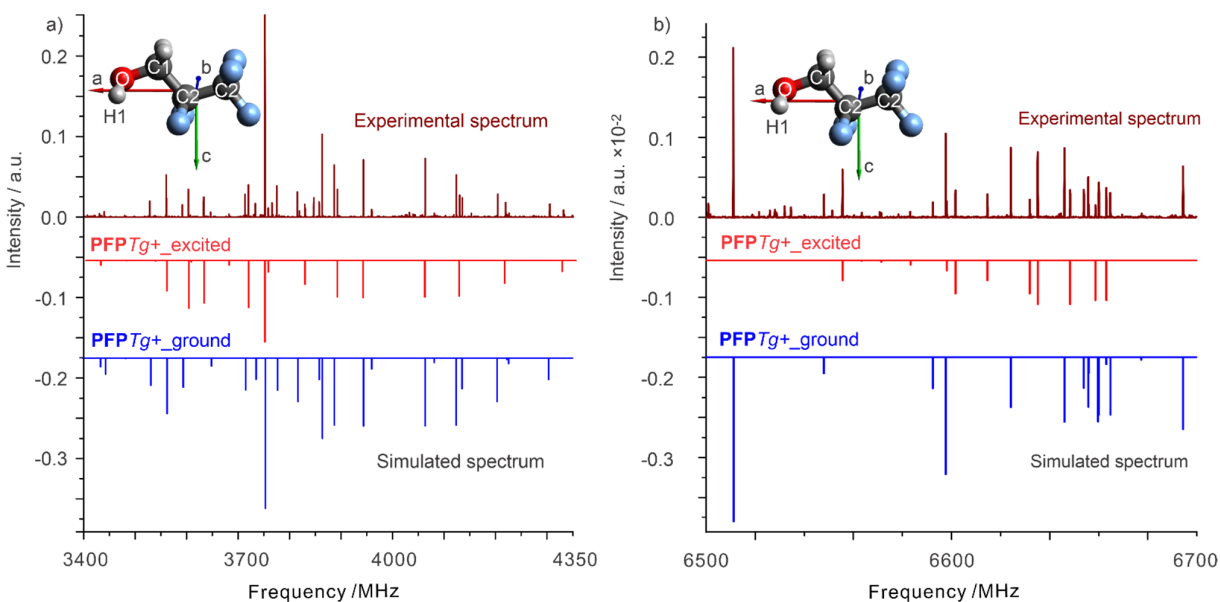

**Figure S2.** Experimental spectra of  $\text{PFP } T_{g+}/\text{PFP } T_{g-}$  monomer transitions measured using neon as a carrier gas. The ground state transitions are presented in blue and those of excited state in red. The known transitions of the  $\text{PFP } G_{+g+}/\text{PFP } G_{-g-}$  monomer and the PFP monohydrate species are removed for clarity. The experimental spectroscopic constants, the calculated electric dipole moment components, and a rotational temperature of 0.6 K were used for the spectral simulations. Please note that the b) 6.5-6.7 GHz is outside the usual operational range of the TWT and the power is lower at the higher frequency end. The experimental spectra were recorded by averaging about 900 k free induction decays.

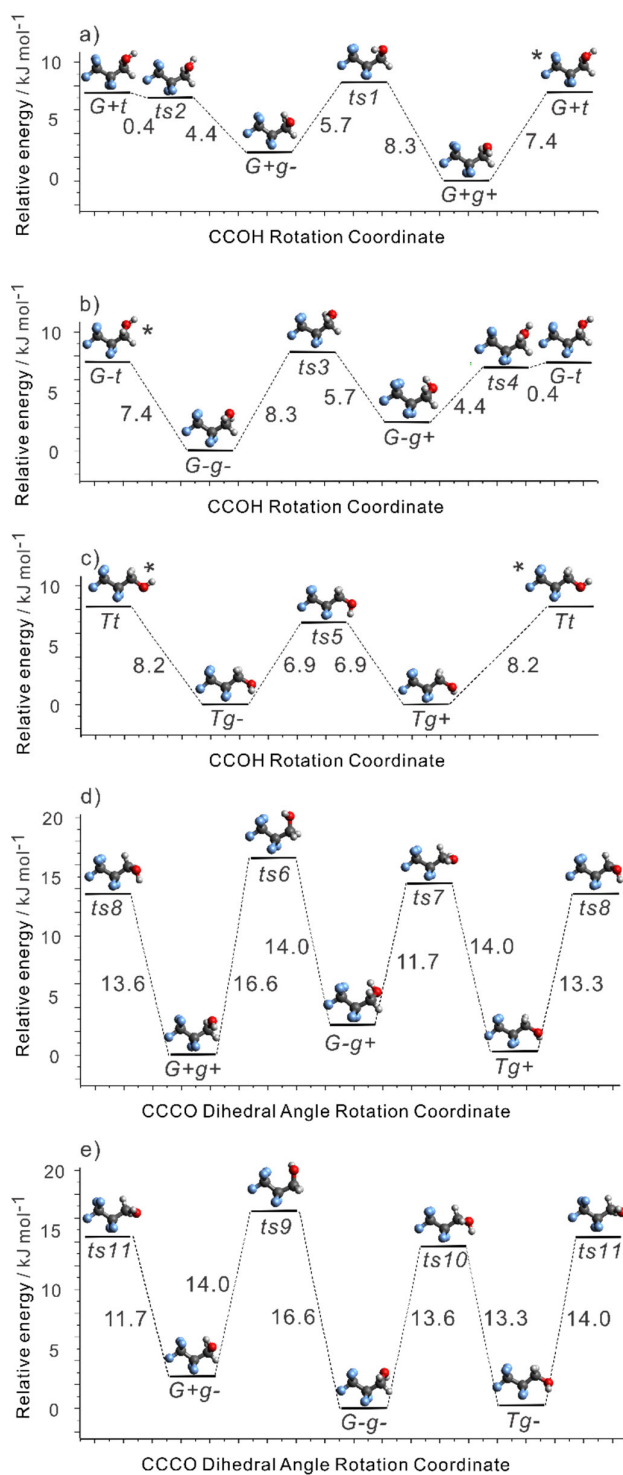

**Figure S3.** The interconversion barriers after *ZPE* corrections in kJ mol<sup>-1</sup> of the PFP conformers at the B3LYP-D3(BJ)/def2-QZVP level. \* indicates that the *t*-conformers are unstable, i.e., above the nearby transition states (see also Figure 4 in the main text).

**Table S8.** Experimental Kraitchman's coordinates (in Å) in the principal inertia axis of **PFPG+g+/G-g-**.

| <i>Atom</i>      | <i>a</i>                 | <i>b</i>    | <i>c</i>          |
|------------------|--------------------------|-------------|-------------------|
| <sup>13</sup> C1 | 1.64862(91) <sup>i</sup> | -0.025(60)  | 0.6826(22)        |
| <sup>13</sup> C2 | 0.3892(39)               | -0.5664(27) | 0.0 <sup>ii</sup> |
| <sup>13</sup> C3 | -0.8365(18)              | 0.3012(50)  | 0.0               |
| <sup>18</sup> O1 | 2.12666(71)              | 1.16341(13) | 0.0               |
| <sup>2</sup> H1  | 2.42133(62)              | 0.8965(17)  | -0.8446(18)       |

<sup>i</sup> Costain errors in units of the least significant digits are given in brackets.<sup>ii</sup> Non-physical value and set to 0.0.**Table S9.** The  $r_0$  structural parameters obtained from the STRFIT fit for **PFPG+g+/G-g-**.<sup>a</sup>

| parameter | exp. <sup>b</sup> | theo. <sup>c</sup> | Parameter      | exp. <sup>b</sup> | theo. <sup>c</sup> |
|-----------|-------------------|--------------------|----------------|-------------------|--------------------|
| C1-C2 /Å  | 1.5448(34)        | 1.5247             | H1-O1-C1 /°    | 105.1(25)         | 109.42             |
| C2-C3 /Å  | 1.483(11)         | 1.5504             | O1-C1-C2 /°    | 119.1(21)         | 113.32             |
| C1-O1 /Å  | 1.334(35)         | 1.4038             | H1-O1-C1-C2 /° | 69.0(23)          | 62.92              |
| H1-O1 /Å  | 0.892(39)         | 0.9615             | O1-C1-C2-C3 /° | 59.2(25)          | 63.34              |

<sup>a</sup> Bond lengths and angles are listed with four and two digits after the decimal points, respectively for consistency. These do not necessarily reflect their uncertainties. The atom numberings are provided in Figure 1.<sup>b</sup> Structural parameters without error bars are directly read from the STRFIT output geometry.<sup>c</sup> The equilibrium geometry at the B3LYP-D3(BJ)/def2-QZVP level of theory.**Table S10.** Experimental  $r_0$  coordinates (in Å) of **PFPG-g-** monomer in the principal inertia axis based on the STRFIT geometry.<sup>a</sup>

| Atom | <i>a</i>    | <i>b</i>    | <i>c</i>    |
|------|-------------|-------------|-------------|
| C1   | -1.648(17)  | -0.057(16)  | 0.584(42)   |
| H2   | -1.431(37)  | -0.393(44)  | 1.596(48)   |
| H3   | -2.393(15)  | 0.742(18)   | 0.637(35)   |
| C2   | -0.4262(52) | 0.5645(22)  | 0.0181(19)  |
| F1   | -0.137(15)  | 1.679(21)   | 0.738(36)   |
| F2   | -0.662(30)  | 0.949(38)   | -1.2693(45) |
| C3   | 0.8444(26)  | -0.3141(32) | 0.0075(11)  |
| F3   | 0.708(15)   | -1.352(22)  | -0.819(33)  |
| F4   | 1.083(28)   | -0.779(37)  | 1.2427(93)  |
| F5   | 1.9029(86)  | 0.401(11)   | -0.385(41)  |
| O1   | -2.1231(74) | -1.1752(91) | 0.0338(83)  |
| H1   | -2.430(14)  | -0.928(35)  | -0.766(35)  |

<sup>a</sup> The experimental rotational constants were used and some structural parameters were fixed at the values obtained at the B3LYP-D3BJ/def2-QZVP level.

**Table S11.** The  $r_e^{SE}$  geometry parameters obtained from the STRFIT fit for **PFPG+g+/G-g-**.<sup>a</sup>

| parameter | semi-exp. <sup>b</sup> | theo. <sup>c</sup> | Parameter      | semi-exp. <sup>b</sup> | theo. <sup>c</sup> |
|-----------|------------------------|--------------------|----------------|------------------------|--------------------|
| C1-C2 /Å  | 1.5192(21)             | 1.5148             | H1-O1-C1 /°    | 107.16(50)             | 107.82             |
| C2-C3 /Å  | 1.54609(73)            | 1.5378             | O1-C1-C2 /°    | 113.61(40)             | 112.99             |
| C1-O1 /Å  | 1.3985(77)             | 1.4041             | H1-O1-C1-C2 /° | 65.43(45)              | 61.03              |
| H1-O1 /Å  | 0.9560(87)             | 0.9624             | O1-C1-C2-C3 /° | 62.66(43)              | 62.63              |

<sup>a</sup> Bond lengths and angles are listed with four and two digits after the decimal points, respectively for consistency. These do not necessarily reflect their uncertainties. The atom numberings are in Figure 1.

<sup>b</sup> Structural parameters without error bars are directly read from the STRFIT output geometry.

<sup>c</sup> The equilibrium structural parameters at the MP2/cc-pVTZ level of theory.

**Table S12.** The  $r_e^{SE}$  coordinates (in Å) of **PFPG+g+/G-g-** in its principal inertia axis.<sup>a</sup>

| Atom | <i>a</i>    | <i>b</i>     | <i>c</i>     |
|------|-------------|--------------|--------------|
| C1   | -1.6511(37) | -0.0164(36)  | 0.6726(83)   |
| H2   | -2.3892(34) | 0.7890(38)   | 0.6961(68)   |
| H3   | -1.4070(81) | -0.2922(93)  | 1.6941(89)   |
| C2   | -0.4150(11) | 0.57638(44)  | 0.01799(35)  |
| F1   | -0.6916(62) | 0.8885(77)   | -1.27503(40) |
| F2   | -0.0897(27) | 1.7175(37)   | 0.6670(75)   |
| C3   | 0.84404(58) | -0.32092(69) | 0.01168(23)  |
| F3   | 0.6698(28)  | -1.3890(41)  | -0.7583(70)  |
| F4   | 1.8916(20)  | 0.3619(24)   | -0.4443(80)  |
| F5   | 1.1114(58)  | -0.7260(76)  | 1.2555(14)   |
| O1   | -2.1258(16) | -1.1668(19)  | 0.0345(17)   |
| H1   | -2.4234(31) | -0.9044(79)  | -0.8354(76)  |

<sup>a</sup> The semi-experimental equilibrium rotational constants were used. Some structural parameters were fixed at the values obtained at the MP2/cc-pVTZ level. See the main text for details.

**Table S13.** Comparison of the experimental bond lengths (in Å), angles (°) and dihedral angle (°) with the theoretical predictions at the indicated level of theory.

| Atom           | $r_0$      | $r_s$      | $r_e^{SE}$  | MP2 <sup>a</sup> | PBE <sup>b</sup> | B3LYP <sup>c</sup> |
|----------------|------------|------------|-------------|------------------|------------------|--------------------|
| C1-C2 /Å       | 1.5448(34) | 1.531(21)  | 1.5192(21)  | 1.51480          | 1.51906          | 1.52472            |
| C2-C3 /Å       | 1.483(11)  | 1.5017(48) | 1.54609(73) | 1.53779          | 1.54484          | 1.55044            |
| C1-O1 /Å       | 1.334(35)  | 1.452(49)  | 1.3985(77)  | 1.40409          | 1.39434          | 1.40379            |
| H1-O1 /Å       | 0.892(39)  | 0.9337(18) | 0.9560(87)  | 0.96240          | 0.96191          | 0.96149            |
| H1-O1-C1 /°    | 105.1(25)  | 107.1(13)  | 107.16(50)  | 107.815          | 109.119          | 109.417            |
| O1-C1-C2 /°    | 119.1(21)  | 110.5(15)  | 113.61(40)  | 112.994          | 113.407          | 113.320            |
| H1-O1-C1-C2 /° | 69.0(23)   | 67.1(20)   | 65.43(45)   | 61.027           | 62.111           | 62.919             |
| O1-C1-C2-C3 /° | 59.2(25)   | 63.6(15)   | 62.66(43)   | 62.634           | 64.144           | 63.337             |

<sup>a</sup> At the MP2/cc-pVTZ level of theory.

<sup>b</sup> At the PBE1PBE-D3BJ/def2-TZVPD level of theory.

<sup>c</sup> At the B3LYP-D3BJ/def2-QZVP level of theory.

**Table S14.** Full list of the properties of the for 2,2,3,3,3-pentafluoro-1-propanol homodimer conformations predicted at the B3LYP- D3(BJ)/def2-QZVP level of theory.

| #  | Homodimers       | $\Delta E_{\text{raw}}^a$ | $\Delta E_0^b$ | $\Delta E_b^c$ | $A^d$  | $B^d$ | $C^d$ | $ \mu_a ^e$ | $ \mu_b ^e$ | $ \mu_c ^e$ |
|----|------------------|---------------------------|----------------|----------------|--------|-------|-------|-------------|-------------|-------------|
| 1  | PFPG+g+PFPTg+    | 0.0                       | 0.0            | 23.4           | 990.7  | 156.9 | 154.3 | 2.7         | 0.6         | 1.0         |
| 2  | PFPG+g+PFPG+g+   | 0.7                       | 0.4            | 22.8           | 848.5  | 171.1 | 167.2 | 2.0         | 1.1         | 0.3         |
| 3  | PFPTg+PFPTg+     | 0.3                       | 0.4            | 23.3           | 767.4  | 185.9 | 172.1 | 2.7         | 0.1         | 0.9         |
| 4  | PFPG+g+PFPG-g-   | 1.1                       | 0.5            | 22.6           | 793.7  | 191.5 | 184.0 | 2.4         | 1.6         | 0.1         |
| 5  | PFPG+g+PFPTg-    | 0.9                       | 0.5            | 22.9           | 793.9  | 179.3 | 169.0 | 2.8         | -1.5        | -0.7        |
| 6  | PFPTg+PFPG-g-    | 1.0                       | 0.6            | 22.8           | 679.3  | 229.4 | 202.9 | 2.6         | 1.2         | 0.3         |
| 7  | PFPTg+PFPTg-     | 1.0                       | 0.7            | 23.0           | 650.4  | 218.2 | 189.7 | 3.0         | 1.2         | 0.1         |
| 8  | PFPG+g+PFPTg+    | 0.8                       | 0.9            | 22.5           | 764.3  | 169.4 | 160.7 | 0.7         | 0.8         | 0.5         |
| 9  | PFPTg+PFPG+g+    | 1.3                       | 0.9            | 22.5           | 724.2  | 187.1 | 180.5 | 2.1         | 0.6         | 0.6         |
| 10 | PFPG+g+PFPG+g+_2 | 0.9                       | 1.0            | 22.2           | 834.6  | 161.4 | 155.5 | 0.6         | 1.0         | 0.3         |
| 11 | PFPG+g+PFPG-g-_2 | 1.4                       | 1.0            | 22.1           | 715.3  | 194.3 | 189.6 | 0.9         | 2.2         | 0.7         |
| 12 | PFPG+g+PFPG+g+_3 | 1.7                       | 1.4            | 21.7           | 714.1  | 215.9 | 200.5 | 1.4         | 3.5         | 0.3         |
| 13 | PFPG+g+PFPTg-_2  | 1.7                       | 1.5            | 22.0           | 715.4  | 176.3 | 164.6 | 0.6         | 1.8         | 1.0         |
| 14 | PFPG+g+PFPTg+_2  | 2.0                       | 1.7            | 21.7           | 709.7  | 202.1 | 185.6 | 1.1         | 2.6         | 1.9         |
| 15 | PFPG+g+PFPG-g-_3 | 2.2                       | 1.8            | 21.3           | 738.4  | 197.5 | 188.5 | 1.2         | 3.3         | 0.4         |
| 16 | PFPG+g+PFPTg-_3  | 2.3                       | 2.1            | -21.3          | 830.5  | 175.7 | 167.8 | 1.4         | 2.9         | 1.2         |
| 17 | PFPG+g+PFPG-g+   | 2.3                       | 2.1            | -23.6          | 830.0  | 187.1 | 177.3 | 2.8         | 0.3         | 1.2         |
| 18 | PFPTg+PFPG-g+    | 2.3                       | 2.3            | -23.8          | 680.3  | 225.6 | 200.3 | 2.8         | 0.0         | 0.8         |
| 19 | PFPTg+PFPG+g+_2  | 2.8                       | 2.5            | -20.9          | 806.0  | 141.8 | 138.0 | 0.9         | 0.6         | 0.5         |
| 20 | PFPG+g-PFPTg-    | 3.0                       | 2.6            | -23.4          | 825.5  | 182.1 | 178.1 | 3.3         | 0.1         | 1.4         |
| 21 | PFPTg+PFPG+g+_3  | 3.0                       | 2.6            | -20.8          | 810.8  | 173.5 | 171.3 | 0.7         | 3.4         | 1.0         |
| 22 | PFPTg+PFPTg+_2   | 3.0                       | 2.8            | -21.0          | 963.1  | 122.7 | 120.1 | 0.5         | 0.7         | 0.4         |
| 23 | PFPTg+PFPG-g-_2  | 3.3                       | 2.9            | -20.5          | 877.9  | 156.9 | 151.5 | 0.5         | 2.3         | 2.5         |
| 24 | PFPTg+ PFPTg+_2  | 3.3                       | 2.9            | -20.8          | 813.6  | 153.6 | 146.6 | 1.0         | 1.1         | 3.3         |
| 25 | PFPG+g+PFPG+g-   | 3.4                       | 3.0            | -22.8          | 925.5  | 164.9 | 160.6 | 3.1         | 1.0         | 0.8         |
| 26 | PFPG+g-PFPG-g-   | 3.6                       | 3.0            | -22.7          | 736.8  | 200.5 | 196.5 | 2.7         | 1.0         | 1.0         |
| 27 | PFPTg+PFPTg-_2   | 3.2                       | 3.0            | -20.7          | 835.0  | 146.3 | 142.3 | 1.0         | 0.8         | 0.3         |
| 28 | PFPG+g+PFPG-g-_4 | 2.9                       | 3.1            | -22.7          | 718.6  | 196.3 | 185.4 | 0.7         | 0.9         | 0.2         |
| 29 | PFPTg+PFPTg-_3   | 3.3                       | 3.1            | -20.7          | 1031.9 | 133.6 | 132.0 | 1.0         | 1.1         | 3.1         |
| 30 | PFPTg+PFPG+g-_2  | 3.6                       | 3.3            | -22.7          | 762.4  | 190.6 | 176.4 | 3.3         | 0.7         | 0.2         |
| 31 | PFPG+g+PFPG+g-_2 | 3.6                       | 3.5            | -22.3          | 715.1  | 215.3 | 200.0 | 1.4         | 2.3         | 2.1         |
| 32 | PFPG+g-PFPTg+    | 4.1                       | 3.6            | -22.5          | 721.2  | 207.8 | 192.8 | 3.2         | 1.0         | 1.1         |
| 33 | PFPG+g+ PFPTg-_2 | 4.1                       | 3.8            | -19.7          | 790.9  | 157.7 | 155.9 | 0.0         | 0.3         | 1.8         |
| 34 | PFPG+g+PFPG+g-_3 | 4.3                       | 4.0            | -21.7          | 839.0  | 157.7 | 153.8 | 1.3         | 1.8         | 0.7         |
| 35 | PFPG+g-PFPG+g+   | 4.9                       | 4.1            | -21.6          | 715.5  | 209.1 | 208.4 | 2.7         | 1.4         | 0.2         |
| 36 | PFPG+g-PFPG+g+_2 | 4.7                       | 4.2            | -21.5          | 745.1  | 207.1 | 190.6 | 2.1         | 2.1         | 0.6         |
| 37 | PFPG+g+PFPG-g+_2 | 4.6                       | 4.3            | -21.5          | 833.4  | 178.8 | 170.7 | 1.7         | 2.7         | 1.5         |
| 38 | PFPG+g-PFPG+g-   | 5.1                       | 4.7            | -23.7          | 725.6  | 216.4 | 200.5 | 3.4         | 0.4         | 1.1         |



|    |                                                        |      |      |       |        |       |       |      |     |     |
|----|--------------------------------------------------------|------|------|-------|--------|-------|-------|------|-----|-----|
| 39 | PFPG+g-PFP <i>T</i> <sub>g-2</sub>                     | 4.7  | 4.7  | -21.3 | 852.1  | 157.3 | 152.1 | 0.3  | 0.4 | 0.7 |
| 40 | PFPG+g-PFP <i>G</i> <sub>g-2</sub>                     | 4.7  | 4.7  | -21.3 | 870.9  | 158.8 | 151.8 | 0.4  | 0.3 | 0.6 |
| 41 | PFPG+g-PFP <i>G</i> <sub>g-3</sub>                     | 5.3  | 4.8  | -21.0 | 754.1  | 198.6 | 196.4 | 1.3  | 0.4 | 3.7 |
| 42 | PFP <i>T</i> <sub>g</sub> +PFP <i>G</i> <sub>g-</sub>  | 5.0  | 4.8  | -21.3 | 834.4  | 167.3 | 160.6 | 0.8  | 0.9 | 3.1 |
| 43 | PFP <i>T</i> <sub>g</sub> +PFP <i>G</i> <sub>g+2</sub> | 5.1  | 4.8  | -21.2 | 786.8  | 149.0 | 140.0 | 0.6  | 0.7 | 0.2 |
| 44 | PFP <i>T</i> <sub>g</sub> +PFP <i>G</i> <sub>g-3</sub> | 5.3  | 4.9  | -18.5 | 859.0  | 146.2 | 138.9 | 0.0  | 0.8 | 1.5 |
| 45 | PFP <i>T</i> <sub>g</sub> +PFP <i>T</i> <sub>g-4</sub> | 5.2  | 4.9  | -18.8 | 718.8  | 161.4 | 148.4 | 0.3  | 1.0 | 1.3 |
| 46 | PFPG+g-PFP <i>G</i> <sub>g+3</sub>                     | 5.6  | 5.0  | -20.7 | 799.6  | 176.2 | 166.5 | 1.3  | 2.0 | 2.8 |
| 47 | PFPG+g-PFP <i>T</i> <sub>g-2</sub>                     | 5.6  | 5.1  | -21.0 | 788.4  | 183.7 | 170.6 | 1.8  | 1.3 | 3.5 |
| 48 | PFPG+g-PFP <i>G</i> <sub>g+4</sub>                     | 5.7  | 5.1  | -20.6 | 776.0  | 193.7 | 188.7 | 1.4  | 1.4 | 3.3 |
| 49 | PFP <i>T</i> <sub>g</sub> +PFP <i>G</i> <sub>g+3</sub> | 5.3  | 5.2  | -20.9 | 770.9  | 171.0 | 158.0 | 0.9  | 0.6 | 0.7 |
| 50 | PFPG+g-PFP <i>T</i> <sub>g+2</sub>                     | 5.7  | 5.3  | -20.7 | 903.9  | 169.7 | 163.4 | 1.8  | 0.7 | 3.4 |
| 51 | PFP <i>T</i> <sub>g</sub> +PFP <i>G</i> <sub>g+4</sub> | 5.7  | 5.4  | -20.7 | 963.4  | 143.7 | 141.5 | 1.4  | 0.7 | 3.3 |
| 52 | PFPG+g-PFP <i>T</i> <sub>g+3</sub>                     | 6.0  | 5.7  | -20.4 | 816.7  | 158.5 | 153.7 | 1.2  | 0.5 | 1.7 |
| 53 | PFPG+g-PFP <i>G</i> <sub>g+</sub>                      | 6.6  | 6.1  | -22.3 | 809.6  | 190.3 | 182.9 | 3.4  | 0.1 | 1.2 |
| 54 | PFPG+g+PFP <i>G</i> <sub>t</sub>                       | 7.3  | 6.2  | -26.1 | 883.3  | 180.0 | 177.1 | 0.2  | 0.5 | 2.0 |
| 55 | PFPG+g-PFP <i>G</i> <sub>g-2</sub>                     | 6.7  | 6.8  | -21.5 | 790.8  | 185.4 | 170.4 | 0.4  | 0.2 | 0.7 |
| 56 | PFP <i>T</i> <sub>g</sub> +PFP <i>G</i> <sub>t</sub>   | 8.2  | 7.1  | -25.5 | 846.9  | 174.6 | 167.2 | 0.4  | 1.0 | 2.0 |
| 57 | PFPG+g+PFP <i>G</i> <sub>t</sub>                       | 7.8  | 7.2  | -25.2 | 876.2  | 161.4 | 156.9 | 1.1  | 0.6 | 1.6 |
| 58 | PFPG+g-PFP <i>G</i> <sub>g+2</sub>                     | 7.7  | 7.2  | -21.2 | 790.4  | 178.8 | 168.3 | 1.7  | 0.0 | 3.3 |
| 59 | PFP <i>T</i> <sub>g</sub> +PFP <i>G</i> <sub>t</sub>   | 9.0  | 7.3  | -25.4 | 793.6  | 169.2 | 161.3 | 1.2  | 0.3 | 2.7 |
| 60 | PFPG+g-PFP <i>G</i> <sub>g-3</sub>                     | 8.0  | 7.5  | -20.9 | 866.3  | 173.7 | 165.1 | 2.2  | 0.6 | 3.5 |
| 61 | PFPG+g+PFP <i>G</i> <sub>t+2</sub>                     | 8.5  | 7.6  | -24.7 | 800.7  | 177.8 | 174.8 | 1.4  | 0.9 | 1.1 |
| 62 | PFP <i>T</i> <sub>g</sub> +PFP <i>T</i> <sub>t</sub>   | 9.0  | 7.8  | -26.0 | 706.2  | 193.8 | 175.7 | 0.9  | 0.7 | 2.0 |
| 63 | PFPG+g+PFP <i>T</i> <sub>t</sub>                       | 8.5  | 7.8  | -25.6 | 818.4  | 165.6 | 158.0 | 1.1  | 0.2 | 1.6 |
| 64 | PFPG+g-PFP <i>G</i> <sub>g+3</sub>                     | 8.0  | 7.8  | -20.6 | 778.0  | 182.7 | 169.0 | 0.9  | 0.2 | 1.9 |
| 65 | PFPG+g-PFP <i>G</i> <sub>t</sub>                       | 9.2  | 8.3  | -26.7 | 817.2  | 191.1 | 183.9 | 1.0  | 2.8 | 0.5 |
| 66 | PFP <i>T</i> <sub>g</sub> +PFP <i>G</i> <sub>t-2</sub> | 9.7  | 8.4  | -24.3 | 722.6  | 209.4 | 198.6 | -0.6 | 0.7 | 1.7 |
| 67 | PFP <i>T</i> <sub>g</sub> +PFP <i>G</i> <sub>t-3</sub> | 9.9  | 8.6  | -24.1 | 896.7  | 145.5 | 141.0 | 0.1  | 1.9 | 0.6 |
| 68 | PFPG+ <i>t</i> +PFP <i>G</i> <sub>g+</sub>             | 10.4 | 9.0  | -16.7 | 739.7  | 210.3 | 192.0 | 3.9  | 2.8 | 0.8 |
| 69 | PFPG+g-PFP <i>T</i> <sub>t</sub>                       | 10.2 | 9.1  | -33.6 | 779.4  | 187.2 | 182.5 | 1.6  | 2.1 | 1.5 |
| 70 | PFP <i>T</i> <sub>g</sub> +PFP <i>T</i> <sub>t-2</sub> | 10.4 | 9.2  | -24.5 | 1080.5 | 123.0 | 121.9 | 0.2  | 2.0 | 0.8 |
| 71 | PFPG+g-PFP <i>G</i> <sub>t</sub>                       | 10.9 | 9.3  | -25.7 | 764.8  | 188.7 | 187.8 | 2.0  | 1.2 | 2.6 |
| 72 | PFPG+g-PFP <i>G</i> <sub>t+2</sub>                     | 10.8 | 9.8  | -25.2 | 743.9  | 213.0 | 202.6 | 0.8  | 2.1 | 0.8 |
| 73 | PFPG+g-PFP <i>T</i> <sub>t-2</sub>                     | 13.2 | 12.3 | -30.4 | 863.8  | 163.5 | 158.3 | 0.0  | 2.0 | 2.3 |
| 74 | PFPG+g+PFP <i>G</i> <sub>t-2</sub>                     | 16.7 | 14.1 | -18.3 | 707.2  | 214.7 | 202.1 | 3.3  | 4.2 | 1.6 |
| 75 | PFPG+g+PFP <i>T</i> <sub>t-2</sub>                     | 17.1 | 15.0 | -18.5 | 737.4  | 193.6 | 180.3 | 3.0  | 4.5 | 0.9 |
| 76 | PFPG+ <i>t</i> PFP <i>G</i> <sub>t</sub>               | 18.8 | 16.4 | -25.2 | 767.7  | 164.2 | 161.0 | 5.4  | 2.4 | 2.2 |
| 77 | PFPG+ <i>t</i> +PFP <i>G</i> <sub>t</sub>              | 18.9 | 16.6 | -25.0 | 806.6  | 156.6 | 153.6 | 5.1  | 3.1 | 1.3 |
| 78 | PFPG+ <i>t</i> PFP <i>G</i> <sub>t-2</sub>             | 21.1 | 18.8 | -22.8 | 865.7  | 154.2 | 145.6 | 2.9  | 2.3 | 0.6 |

**Table S15.** Rotational transition frequencies of the **PFPG+g+PFP**Tg+ homodimer.

| $J'$ | $K_a'$ | $K_c'$ | $J''$ | $K_a''$ | $K_c''$ | Obs/ MHz  | Cal/ MHz  | Obs - Cal/ MHz |
|------|--------|--------|-------|---------|---------|-----------|-----------|----------------|
| 5    | 1      | 5      | 4     | 1       | 4       | 1547.7504 | 1547.7511 | -0.0007        |
| 5    | 0      | 5      | 4     | 0       | 4       | 1554.0237 | 1554.0248 | -0.0011        |
| 5    | 3      | 3      | 4     | 3       | 2       | 1554.1742 | 1554.1747 | -0.0005        |
| 5    | 3      | 2      | 4     | 3       | 1       | 1554.1742 | 1554.1749 | -0.0007        |
| 5    | 4      | 2      | 4     | 4       | 1       | 1554.1783 | 1554.1792 | -0.0009        |
| 5    | 4      | 1      | 4     | 4       | 0       | 1554.1783 | 1554.1792 | -0.0009        |
| 5    | 2      | 3      | 4     | 2       | 2       | 1554.2502 | 1554.2495 | 0.0007         |
| 5    | 1      | 4      | 4     | 1       | 3       | 1560.4817 | 1560.4821 | -0.0004        |
| 6    | 1      | 6      | 5     | 1       | 5       | 1857.2792 | 1857.2794 | -0.0002        |
| 6    | 0      | 6      | 5     | 0       | 5       | 1864.7596 | 1864.7598 | -0.0002        |
| 6    | 2      | 5      | 5     | 2       | 4       | 1864.9428 | 1864.9433 | -0.0005        |
| 6    | 3      | 3      | 5     | 3       | 2       | 1865.0113 | 1865.0113 | 0.0000         |
| 6    | 3      | 4      | 5     | 3       | 3       | 1865.0113 | 1865.0109 | 0.0004         |
| 6    | 4      | 3      | 5     | 4       | 2       | 1865.0130 | 1865.0128 | 0.0002         |
| 6    | 4      | 2      | 5     | 4       | 1       | 1865.0130 | 1865.0128 | 0.0002         |
| 6    | 5      | 2      | 5     | 5       | 1       | 1865.0251 | 1865.0253 | -0.0002        |
| 6    | 5      | 1      | 5     | 5       | 0       | 1865.0251 | 1865.0253 | -0.0002        |
| 6    | 2      | 4      | 5     | 2       | 3       | 1865.1463 | 1865.1459 | 0.0004         |
| 6    | 1      | 5      | 5     | 1       | 4       | 1872.5552 | 1872.5557 | -0.0005        |
| 4    | 1      | 3      | 3     | 0       | 3       | 2096.4035 | 2096.4031 | 0.0004         |
| 7    | 1      | 7      | 6     | 1       | 6       | 2166.7959 | 2166.7957 | 0.0002         |
| 7    | 0      | 7      | 6     | 0       | 6       | 2175.4569 | 2175.4567 | 0.0002         |
| 7    | 2      | 6      | 6     | 2       | 5       | 2175.7438 | 2175.7435 | 0.0003         |
| 7    | 3      | 5      | 6     | 3       | 4       | 2175.8486 | 2175.8477 | 0.0009         |
| 7    | 3      | 4      | 6     | 3       | 3       | 2175.8486 | 2175.8487 | -0.0001        |
| 7    | 2      | 5      | 6     | 2       | 4       | 2176.0674 | 2176.0675 | -0.0001        |
| 7    | 1      | 6      | 6     | 1       | 5       | 2184.6170 | 2184.6169 | 0.0001         |
| 5    | 1      | 4      | 4     | 0       | 4       | 2413.6276 | 2413.6271 | 0.0005         |
| 8    | 1      | 8      | 7     | 1       | 7       | 2476.2999 | 2476.2981 | 0.0018         |
| 8    | 0      | 8      | 7     | 0       | 7       | 2486.1093 | 2486.1091 | 0.0002         |
| 8    | 2      | 7      | 7     | 2       | 6       | 2486.5326 | 2486.5327 | -0.0001        |
| 8    | 4      | 5      | 7     | 4       | 4       | 2486.6753 | 2486.6757 | -0.0004        |
| 8    | 4      | 4      | 7     | 4       | 3       | 2486.6753 | 2486.6757 | -0.0004        |
| 8    | 3      | 5      | 7     | 3       | 4       | 2486.6863 | 2486.6872 | -0.0009        |
| 8    | 3      | 6      | 7     | 3       | 5       | 2486.6863 | 2486.6852 | 0.0011         |
| 8    | 5      | 4      | 7     | 5       | 3       | 2486.6863 | 2486.6870 | -0.0007        |
| 8    | 5      | 3      | 7     | 5       | 2       | 2486.6863 | 2486.6870 | -0.0007        |
| 8    | 6      | 3      | 7     | 6       | 2       | 2486.7095 | 2486.7096 | -0.0001        |

|    |   |    |    |   |    |           |           |         |
|----|---|----|----|---|----|-----------|-----------|---------|
| 8  | 6 | 2  | 7  | 6 | 1  | 2486.7095 | 2486.7096 | -0.0001 |
| 8  | 2 | 6  | 7  | 2 | 5  | 2487.0187 | 2487.0187 | 0.0000  |
| 8  | 1 | 7  | 7  | 1 | 6  | 2496.6631 | 2496.6634 | -0.0003 |
| 6  | 1 | 5  | 5  | 0 | 5  | 2732.1585 | 2732.1581 | 0.0004  |
| 9  | 1 | 9  | 8  | 1 | 8  | 2785.7853 | 2785.7848 | 0.0005  |
| 9  | 0 | 9  | 8  | 0 | 8  | 2796.7118 | 2796.7109 | 0.0009  |
| 9  | 2 | 8  | 8  | 2 | 7  | 2797.3096 | 2797.3094 | 0.0002  |
| 9  | 4 | 6  | 8  | 4 | 5  | 2797.5041 | 2797.5047 | -0.0006 |
| 9  | 4 | 5  | 8  | 4 | 4  | 2797.5041 | 2797.5047 | -0.0006 |
| 9  | 5 | 4  | 8  | 5 | 3  | 2797.5131 | 2797.5137 | -0.0006 |
| 9  | 5 | 5  | 8  | 5 | 4  | 2797.5131 | 2797.5137 | -0.0006 |
| 9  | 3 | 7  | 8  | 3 | 6  | 2797.5237 | 2797.5233 | 0.0004  |
| 9  | 3 | 6  | 8  | 3 | 5  | 2797.5265 | 2797.5270 | -0.0005 |
| 9  | 6 | 3  | 8  | 6 | 2  | 2797.5378 | 2797.5371 | 0.0007  |
| 9  | 6 | 4  | 8  | 6 | 3  | 2797.5378 | 2797.5371 | 0.0007  |
| 9  | 2 | 7  | 8  | 2 | 6  | 2798.0028 | 2798.0034 | -0.0006 |
| 9  | 1 | 8  | 8  | 1 | 7  | 2808.6939 | 2808.6932 | 0.0007  |
| 12 | 0 | 12 | 11 | 1 | 11 | 2968.6564 | 2968.6566 | -0.0002 |
| 7  | 1 | 7  | 6  | 0 | 6  | 2980.7249 | 2980.7232 | 0.0017  |
| 7  | 1 | 6  | 6  | 0 | 6  | 3052.0161 | 3052.0152 | 0.0009  |
| 13 | 0 | 13 | 12 | 1 | 11 | 3094.4809 | 3094.4799 | 0.0010  |
| 10 | 1 | 10 | 9  | 1 | 9  | 3095.2543 | 3095.2539 | 0.0004  |
| 10 | 0 | 10 | 9  | 0 | 9  | 3107.2561 | 3107.2557 | 0.0004  |
| 10 | 2 | 9  | 9  | 2 | 8  | 3108.0723 | 3108.0720 | 0.0003  |
| 10 | 4 | 6  | 9  | 4 | 5  | 3108.3319 | 3108.3318 | 0.0001  |
| 10 | 4 | 7  | 9  | 4 | 6  | 3108.3319 | 3108.3318 | 0.0001  |
| 10 | 5 | 6  | 9  | 5 | 5  | 3108.3373 | 3108.3371 | 0.0002  |
| 10 | 5 | 5  | 9  | 5 | 4  | 3108.3373 | 3108.3371 | 0.0002  |
| 10 | 3 | 8  | 9  | 3 | 7  | 3108.3612 | 3108.3620 | -0.0008 |
| 10 | 6 | 5  | 9  | 6 | 4  | 3108.3612 | 3108.3606 | 0.0006  |
| 10 | 6 | 4  | 9  | 6 | 3  | 3108.3612 | 3108.3606 | 0.0006  |
| 10 | 3 | 7  | 9  | 3 | 6  | 3108.3683 | 3108.3685 | -0.0002 |
| 10 | 2 | 8  | 9  | 2 | 7  | 3109.0253 | 3109.0258 | -0.0005 |
| 10 | 1 | 9  | 9  | 1 | 8  | 3120.7035 | 3120.7039 | -0.0004 |
| 8  | 1 | 8  | 7  | 0 | 7  | 3281.5645 | 3281.5646 | -0.0001 |
| 8  | 1 | 7  | 7  | 0 | 7  | 3373.2244 | 3373.2219 | 0.0025  |
| 14 | 0 | 14 | 13 | 1 | 12 | 3386.6249 | 3386.6255 | -0.0006 |
| 11 | 1 | 11 | 10 | 1 | 10 | 3404.7049 | 3404.7036 | 0.0013  |
| 11 | 0 | 11 | 10 | 0 | 10 | 3417.7375 | 3417.7375 | 0.0000  |
| 11 | 2 | 10 | 10 | 2 | 9  | 3418.8197 | 3418.8190 | 0.0007  |

|    |   |    |    |   |    |           |           |         |
|----|---|----|----|---|----|-----------|-----------|---------|
| 11 | 4 | 7  | 10 | 4 | 6  | 3419.1566 | 3419.1568 | -0.0002 |
| 11 | 5 | 7  | 10 | 5 | 6  | 3419.1566 | 3419.1569 | -0.0003 |
| 11 | 4 | 8  | 10 | 4 | 7  | 3419.1566 | 3419.1567 | -0.0001 |
| 11 | 5 | 6  | 10 | 5 | 5  | 3419.1566 | 3419.1569 | -0.0003 |
| 11 | 3 | 8  | 10 | 3 | 7  | 3419.2118 | 3419.2118 | 0.0000  |
| 11 | 2 | 9  | 10 | 2 | 8  | 3420.0885 | 3420.0898 | -0.0013 |
| 11 | 1 | 10 | 10 | 1 | 9  | 3432.6942 | 3432.6934 | 0.0008  |
| 3  | 2 | 2  | 2  | 1 | 1  | 3475.6751 | 3475.6742 | 0.0009  |
| 3  | 2 | 1  | 2  | 1 | 1  | 3475.7031 | 3475.7032 | -0.0001 |
| 15 | 0 | 15 | 14 | 1 | 13 | 3677.0296 | 3677.0302 | -0.0006 |
| 9  | 1 | 8  | 8  | 0 | 8  | 3695.8044 | 3695.8059 | -0.0015 |
| 12 | 1 | 12 | 11 | 1 | 11 | 3714.1342 | 3714.1321 | 0.0021  |
| 12 | 0 | 12 | 11 | 0 | 11 | 3728.1501 | 3728.1503 | -0.0002 |
| 12 | 2 | 11 | 11 | 2 | 10 | 3729.5478 | 3729.5488 | -0.0010 |
| 12 | 5 | 7  | 11 | 5 | 6  | 3729.9723 | 3729.9728 | -0.0005 |
| 12 | 5 | 8  | 11 | 5 | 7  | 3729.9723 | 3729.9728 | -0.0005 |
| 12 | 4 | 8  | 11 | 4 | 7  | 3729.9785 | 3729.9794 | -0.0009 |
| 12 | 4 | 9  | 11 | 4 | 8  | 3729.9785 | 3729.9793 | -0.0008 |
| 12 | 6 | 6  | 11 | 6 | 5  | 3729.9924 | 3729.9940 | -0.0016 |
| 12 | 6 | 7  | 11 | 6 | 6  | 3729.9924 | 3729.9940 | -0.0016 |
| 12 | 3 | 10 | 11 | 3 | 9  | 3730.0406 | 3730.0412 | -0.0006 |
| 12 | 3 | 9  | 11 | 3 | 8  | 3730.0582 | 3730.0575 | 0.0007  |
| 12 | 2 | 10 | 11 | 2 | 9  | 3731.1995 | 3731.1994 | 0.0001  |
| 12 | 1 | 11 | 11 | 1 | 10 | 3744.6613 | 3744.6594 | 0.0019  |
| 10 | 1 | 10 | 9  | 0 | 9  | 3879.7854 | 3879.7834 | 0.0020  |
| 10 | 1 | 9  | 9  | 0 | 9  | 4019.7999 | 4019.7990 | 0.0009  |
| 13 | 1 | 13 | 12 | 1 | 12 | 4023.5364 | 4023.5375 | -0.0011 |
| 13 | 0 | 13 | 12 | 0 | 12 | 4038.4883 | 4038.4881 | 0.0002  |
| 13 | 2 | 12 | 12 | 2 | 11 | 4040.2611 | 4040.2599 | 0.0012  |
| 13 | 5 | 9  | 12 | 5 | 8  | 4040.7841 | 4040.7843 | -0.0002 |
| 13 | 5 | 8  | 12 | 5 | 7  | 4040.7841 | 4040.7843 | -0.0002 |
| 13 | 4 | 9  | 12 | 4 | 8  | 4040.8005 | 4040.7994 | 0.0011  |
| 13 | 4 | 10 | 12 | 4 | 9  | 4040.8005 | 4040.7993 | 0.0012  |
| 13 | 3 | 11 | 12 | 3 | 10 | 4040.8806 | 4040.8814 | -0.0008 |
| 13 | 2 | 11 | 12 | 2 | 10 | 4042.3603 | 4042.3583 | 0.0020  |
| 13 | 1 | 12 | 12 | 1 | 11 | 4056.5999 | 4056.5995 | 0.0004  |
| 18 | 3 | 16 | 18 | 2 | 16 | 4311.9884 | 4311.9898 | -0.0014 |
| 17 | 3 | 15 | 17 | 2 | 15 | 4315.9212 | 4315.9200 | 0.0012  |
| 16 | 3 | 14 | 16 | 2 | 14 | 4319.2337 | 4319.2341 | -0.0004 |
| 14 | 1 | 14 | 13 | 1 | 13 | 4332.9164 | 4332.9184 | -0.0020 |

|    |   |    |    |   |    |           |           |         |
|----|---|----|----|---|----|-----------|-----------|---------|
| 11 | 3 | 8  | 11 | 2 | 10 | 4332.9164 | 4332.9158 | 0.0006  |
| 20 | 3 | 17 | 20 | 2 | 19 | 4344.6631 | 4344.6636 | -0.0005 |
| 11 | 1 | 10 | 10 | 0 | 10 | 4345.2372 | 4345.2366 | 0.0006  |
| 14 | 0 | 14 | 13 | 0 | 13 | 4348.7445 | 4348.7452 | -0.0007 |
| 14 | 2 | 13 | 13 | 2 | 12 | 4350.9506 | 4350.9507 | -0.0001 |
| 14 | 2 | 12 | 13 | 2 | 11 | 4353.5711 | 4353.5702 | 0.0009  |
| 14 | 1 | 13 | 13 | 1 | 12 | 4368.5121 | 4368.5114 | 0.0007  |
| 6  | 2 | 5  | 5  | 1 | 5  | 4431.0751 | 4431.0760 | -0.0009 |
| 17 | 0 | 17 | 16 | 1 | 16 | 4598.3176 | 4598.3197 | -0.0021 |
| 15 | 1 | 15 | 14 | 1 | 14 | 4642.2746 | 4642.2729 | 0.0017  |
| 15 | 0 | 15 | 14 | 0 | 14 | 4658.9158 | 4658.9161 | -0.0003 |
| 15 | 2 | 14 | 14 | 2 | 13 | 4661.6199 | 4661.6196 | 0.0003  |
| 15 | 4 | 11 | 14 | 4 | 10 | 4662.4316 | 4662.4310 | 0.0006  |
| 15 | 4 | 12 | 14 | 4 | 11 | 4662.4316 | 4662.4307 | 0.0009  |
| 15 | 7 | 8  | 14 | 7 | 7  | 4662.4422 | 4662.4419 | 0.0003  |
| 15 | 7 | 9  | 14 | 7 | 8  | 4662.4422 | 4662.4419 | 0.0003  |
| 15 | 2 | 13 | 14 | 2 | 12 | 4664.8384 | 4664.8382 | 0.0002  |
| 12 | 1 | 11 | 11 | 0 | 11 | 4672.1581 | 4672.1584 | -0.0003 |
| 15 | 1 | 14 | 14 | 1 | 13 | 4680.3907 | 4680.3928 | -0.0021 |
| 7  | 2 | 6  | 6  | 1 | 6  | 4749.5386 | 4749.5401 | -0.0015 |
| 18 | 0 | 18 | 17 | 1 | 17 | 4926.2831 | 4926.2839 | -0.0008 |
| 16 | 1 | 16 | 15 | 1 | 15 | 4951.5993 | 4951.5996 | -0.0003 |
| 16 | 0 | 16 | 15 | 0 | 15 | 4968.9937 | 4968.9956 | -0.0019 |
| 16 | 2 | 15 | 15 | 2 | 14 | 4972.2645 | 4972.2652 | -0.0007 |
| 16 | 5 | 12 | 15 | 5 | 11 | 4973.1893 | 4973.1892 | 0.0001  |
| 16 | 5 | 11 | 15 | 5 | 10 | 4973.1893 | 4973.1892 | 0.0001  |
| 16 | 6 | 10 | 15 | 6 | 9  | 4973.1941 | 4973.1941 | 0.0000  |
| 16 | 6 | 11 | 15 | 6 | 10 | 4973.1941 | 4973.1941 | 0.0000  |
| 16 | 7 | 10 | 15 | 7 | 9  | 4973.2314 | 4973.2311 | 0.0003  |
| 16 | 7 | 9  | 15 | 7 | 8  | 4973.2314 | 4973.2311 | 0.0003  |
| 16 | 4 | 13 | 15 | 4 | 12 | 4973.2425 | 4973.2417 | 0.0008  |
| 16 | 4 | 12 | 15 | 4 | 11 | 4973.2425 | 4973.2421 | 0.0004  |
| 16 | 3 | 14 | 15 | 3 | 13 | 4973.3995 | 4973.4019 | -0.0024 |
| 16 | 3 | 13 | 15 | 3 | 12 | 4973.4708 | 4973.4713 | -0.0005 |
| 16 | 2 | 14 | 15 | 2 | 13 | 4976.1649 | 4976.1657 | -0.0008 |
| 16 | 1 | 15 | 15 | 1 | 14 | 4992.2416 | 4992.2410 | 0.0006  |
| 13 | 1 | 12 | 12 | 0 | 12 | 5000.6072 | 5000.6077 | -0.0005 |
| 14 | 1 | 14 | 13 | 0 | 13 | 5063.4414 | 5063.4434 | -0.0020 |
| 9  | 5 | 4  | 10 | 4 | 6  | 5234.2559 | 5234.2564 | -0.0005 |
| 9  | 5 | 4  | 10 | 4 | 7  | 5234.2559 | 5234.2565 | -0.0006 |

|    |   |    |    |   |    |           |           |         |
|----|---|----|----|---|----|-----------|-----------|---------|
| 9  | 5 | 5  | 10 | 4 | 7  | 5234.2559 | 5234.2565 | -0.0006 |
| 9  | 5 | 5  | 10 | 4 | 6  | 5234.2559 | 5234.2564 | -0.0005 |
| 17 | 1 | 17 | 16 | 1 | 16 | 5260.8945 | 5260.8968 | -0.0023 |
| 17 | 0 | 17 | 16 | 0 | 16 | 5278.9783 | 5278.9788 | -0.0005 |
| 17 | 2 | 16 | 16 | 2 | 15 | 5282.8854 | 5282.8858 | -0.0004 |
| 17 | 5 | 12 | 16 | 5 | 11 | 5283.9791 | 5283.9798 | -0.0007 |
| 17 | 6 | 11 | 16 | 6 | 10 | 5283.9791 | 5283.9777 | 0.0014  |
| 17 | 6 | 12 | 16 | 6 | 11 | 5283.9791 | 5283.9777 | 0.0014  |
| 17 | 5 | 13 | 16 | 5 | 12 | 5283.9791 | 5283.9798 | -0.0007 |
| 17 | 7 | 10 | 16 | 7 | 9  | 5284.0119 | 5284.0125 | -0.0006 |
| 17 | 7 | 11 | 16 | 7 | 10 | 5284.0119 | 5284.0125 | -0.0006 |
| 17 | 4 | 13 | 16 | 4 | 12 | 5284.0514 | 5284.0499 | 0.0015  |
| 17 | 4 | 13 | 16 | 4 | 12 | 5284.0514 | 5284.0499 | 0.0015  |
| 17 | 4 | 14 | 16 | 4 | 13 | 5284.0514 | 5284.0491 | 0.0023  |
| 17 | 3 | 15 | 16 | 3 | 14 | 5284.2405 | 5284.2411 | -0.0006 |
| 17 | 3 | 14 | 16 | 3 | 13 | 5284.3351 | 5284.3352 | -0.0001 |
| 17 | 2 | 15 | 16 | 2 | 14 | 5287.5563 | 5287.5553 | 0.0010  |
| 9  | 2 | 7  | 8  | 1 | 7  | 5300.5392 | 5300.5404 | -0.0012 |
| 17 | 1 | 16 | 16 | 1 | 15 | 5304.0525 | 5304.0535 | -0.001  |
| 14 | 1 | 13 | 13 | 0 | 13 | 5330.6316 | 5330.6311 | 0.0005  |
| 15 | 1 | 15 | 14 | 0 | 14 | 5356.9734 | 5356.9711 | 0.0023  |
| 9  | 2 | 8  | 8  | 1 | 8  | 5390.2871 | 5390.2883 | -0.0012 |
| 8  | 5 | 3  | 9  | 4 | 5  | 5545.0754 | 5545.0746 | 0.0008  |
| 8  | 5 | 4  | 9  | 4 | 5  | 5545.0754 | 5545.0746 | 0.0008  |
| 8  | 5 | 4  | 9  | 4 | 6  | 5545.0754 | 5545.0746 | 0.0008  |
| 8  | 5 | 3  | 9  | 4 | 6  | 5545.0754 | 5545.0746 | 0.0008  |
| 18 | 1 | 18 | 17 | 1 | 17 | 5570.1609 | 5570.1632 | -0.0023 |
| 18 | 0 | 18 | 17 | 0 | 17 | 5588.8602 | 5588.8610 | -0.0008 |
| 18 | 2 | 17 | 17 | 2 | 16 | 5593.4813 | 5593.4799 | 0.0014  |
| 18 | 5 | 14 | 17 | 5 | 13 | 5594.7624 | 5594.7642 | -0.0018 |
| 18 | 5 | 13 | 17 | 5 | 12 | 5594.7624 | 5594.7642 | -0.0018 |
| 18 | 3 | 16 | 17 | 3 | 15 | 5595.0783 | 5595.0792 | -0.0009 |
| 18 | 3 | 15 | 17 | 3 | 14 | 5595.2067 | 5595.2045 | 0.0022  |
| 18 | 2 | 16 | 17 | 2 | 15 | 5599.0096 | 5599.0094 | 0.0002  |
| 18 | 1 | 17 | 17 | 1 | 16 | 5615.8274 | 5615.8278 | -0.0004 |
| 16 | 1 | 16 | 15 | 0 | 15 | 5649.6539 | 5649.6546 | -0.0007 |
| 7  | 5 | 3  | 8  | 4 | 5  | 5855.8921 | 5855.8923 | -0.0002 |
| 7  | 5 | 3  | 8  | 4 | 4  | 5855.8921 | 5855.8923 | -0.0002 |
| 7  | 5 | 2  | 8  | 4 | 4  | 5855.8921 | 5855.8923 | -0.0002 |
| 7  | 5 | 2  | 8  | 4 | 5  | 5855.8921 | 5855.8923 | -0.0002 |

|    |   |    |    |   |    |           |           |         |
|----|---|----|----|---|----|-----------|-----------|---------|
| 19 | 1 | 19 | 18 | 1 | 18 | 5879.4001 | 5879.3973 | 0.0028  |
| 19 | 0 | 19 | 18 | 0 | 18 | 5898.6361 | 5898.6383 | -0.0022 |
| 19 | 2 | 18 | 18 | 2 | 17 | 5904.0467 | 5904.046  | 0.0007  |
| 19 | 6 | 13 | 18 | 6 | 12 | 5905.5219 | 5905.5219 | 0.0000  |
| 19 | 6 | 14 | 18 | 6 | 13 | 5905.5219 | 5905.5219 | 0.0000  |
| 19 | 4 | 16 | 18 | 4 | 15 | 5905.6555 | 5905.6527 | 0.0028  |
| 19 | 4 | 15 | 18 | 4 | 14 | 5905.6555 | 5905.6543 | 0.0012  |
| 19 | 3 | 17 | 18 | 3 | 16 | 5905.9143 | 5905.9157 | -0.0014 |
| 19 | 3 | 16 | 18 | 3 | 15 | 5906.0802 | 5906.0800 | 0.0002  |
| 19 | 2 | 17 | 18 | 2 | 16 | 5910.5295 | 5910.5300 | -0.0005 |
| 19 | 1 | 18 | 18 | 1 | 17 | 5927.5621 | 5927.5612 | 0.0009  |
| 16 | 1 | 15 | 15 | 0 | 15 | 5995.6054 | 5995.6036 | 0.0018  |
| 20 | 1 | 20 | 19 | 1 | 19 | 6188.5998 | 6188.5977 | 0.0021  |
| 20 | 0 | 20 | 19 | 0 | 19 | 6208.3048 | 6208.3070 | -0.0022 |
| 20 | 2 | 19 | 19 | 2 | 18 | 6214.5827 | 6214.5825 | 0.0002  |
| 20 | 5 | 15 | 19 | 5 | 14 | 6216.3127 | 6216.3131 | -0.0004 |
| 20 | 5 | 16 | 19 | 5 | 15 | 6216.3127 | 6216.3131 | -0.0004 |
| 20 | 4 | 16 | 19 | 4 | 15 | 6216.4497 | 6216.4506 | -0.0009 |
| 20 | 4 | 17 | 19 | 4 | 16 | 6216.4497 | 6216.4484 | 0.0013  |
| 20 | 3 | 18 | 19 | 3 | 17 | 6216.7507 | 6216.7500 | 0.0007  |
| 20 | 3 | 17 | 19 | 3 | 16 | 6216.9629 | 6216.9626 | 0.0003  |
| 20 | 2 | 18 | 19 | 2 | 17 | 6222.1192 | 6222.1187 | 0.0005  |
| 20 | 1 | 19 | 19 | 1 | 18 | 6239.2499 | 6239.2510 | -0.0011 |

**Table S16.** Rotational transition frequencies of the **PFPG+g+PFPG+g+** homodimer.

| $J'$ | $K_a'$ | $K_c'$ | $J''$ | $K_a''$ | $K_c''$ | Obs/ MHz  | Cal/ MHz  | Obs - Cal/ MHz |
|------|--------|--------|-------|---------|---------|-----------|-----------|----------------|
| 5    | 1      | 4      | 4     | 1       | 3       | 1692.1842 | 1692.1846 | -0.0004        |
| 14   | 2      | 12     | 14    | 1       | 13      | 1892.3407 | 1892.3395 | 0.0012         |
| 6    | 1      | 6      | 5     | 1       | 5       | 2007.2750 | 2007.2730 | 0.0020         |
| 6    | 0      | 6      | 5     | 0       | 5       | 2018.4760 | 2018.4738 | 0.0022         |
| 6    | 2      | 5      | 5     | 2       | 4       | 2018.9797 | 2018.9800 | -0.0003        |
| 6    | 4      | 3      | 5     | 4       | 2       | 2019.1249 | 2019.1259 | -0.0010        |
| 6    | 5      | 1      | 5     | 5       | 0       | 2019.1249 | 2019.1232 | 0.0017         |
| 6    | 5      | 2      | 5     | 5       | 1       | 2019.1249 | 2019.1232 | 0.0017         |
| 6    | 4      | 2      | 5     | 4       | 1       | 2019.1249 | 2019.1260 | -0.0011        |
| 6    | 3      | 4      | 5     | 3       | 3       | 2019.1513 | 2019.1499 | 0.0014         |
| 6    | 3      | 3      | 5     | 3       | 2       | 2019.1513 | 2019.1523 | -0.0010        |
| 6    | 2      | 4      | 5     | 2       | 3       | 2019.5544 | 2019.5551 | -0.0007        |

|    |   |    |   |   |   |           |           |         |
|----|---|----|---|---|---|-----------|-----------|---------|
| 6  | 2 | 4  | 6 | 1 | 5 | 2024.0249 | 2024.0263 | -0.0014 |
| 6  | 1 | 5  | 5 | 1 | 4 | 2030.5623 | 2030.5641 | -0.0018 |
| 4  | 2 | 3  | 4 | 1 | 4 | 2082.9547 | 2082.9521 | 0.0026  |
| 5  | 2 | 4  | 5 | 1 | 5 | 2092.6932 | 2092.6963 | -0.0031 |
| 5  | 1 | 5  | 4 | 0 | 4 | 2341.4008 | 2341.4013 | -0.0005 |
| 7  | 1 | 7  | 6 | 1 | 6 | 2341.7434 | 2341.7425 | 0.0009  |
| 7  | 0 | 7  | 6 | 0 | 6 | 2354.6222 | 2354.6220 | 0.0002  |
| 7  | 2 | 6  | 6 | 2 | 5 | 2355.4160 | 2355.4196 | -0.0036 |
| 7  | 2 | 5  | 6 | 2 | 4 | 2356.3410 | 2356.3392 | 0.0018  |
| 7  | 1 | 6  | 6 | 1 | 5 | 2368.9140 | 2368.9118 | 0.0022  |
| 9  | 0 | 9  | 8 | 1 | 8 | 2405.9095 | 2405.9095 | 0.0000  |
| 6  | 1 | 6  | 5 | 0 | 5 | 2666.4509 | 2666.4530 | -0.0020 |
| 8  | 1 | 8  | 7 | 1 | 7 | 2676.1745 | 2676.1777 | -0.0032 |
| 8  | 0 | 8  | 7 | 0 | 7 | 2690.6492 | 2690.6489 | 0.0003  |
| 8  | 2 | 7  | 7 | 2 | 6 | 2691.8322 | 2691.8329 | -0.0007 |
| 8  | 6 | 2  | 7 | 6 | 1 | 2692.1523 | 2692.1530 | -0.0007 |
| 8  | 5 | 3  | 7 | 5 | 2 | 2692.1523 | 2692.1517 | 0.0006  |
| 8  | 5 | 4  | 7 | 5 | 3 | 2692.1523 | 2692.1517 | 0.0006  |
| 8  | 6 | 3  | 7 | 6 | 2 | 2692.1523 | 2692.1530 | -0.0007 |
| 8  | 4 | 4  | 7 | 4 | 3 | 2692.1708 | 2692.1707 | 0.0001  |
| 8  | 4 | 5  | 7 | 4 | 4 | 2692.1708 | 2692.1707 | 0.0001  |
| 8  | 3 | 6  | 7 | 3 | 5 | 2692.2345 | 2692.2346 | -0.0001 |
| 8  | 3 | 5  | 7 | 3 | 4 | 2692.2455 | 2692.2455 | 0.0000  |
| 8  | 2 | 6  | 7 | 2 | 5 | 2693.2106 | 2693.2112 | -0.0006 |
| 8  | 1 | 7  | 7 | 1 | 6 | 2707.2218 | 2707.2221 | -0.0003 |
| 2  | 2 | 1  | 1 | 1 | 0 | 2734.5922 | 2734.5907 | 0.0015  |
| 2  | 2 | 1  | 1 | 1 | 1 | 2738.4768 | 2738.4734 | 0.0034  |
| 2  | 2 | 0  | 1 | 1 | 1 | 2738.492  | 2738.4898 | 0.0022  |
| 10 | 0 | 10 | 9 | 1 | 9 | 2757.6115 | 2757.6088 | 0.0027  |
| 7  | 1 | 7  | 6 | 0 | 6 | 2989.7209 | 2989.7218 | -0.0009 |
| 9  | 1 | 9  | 8 | 1 | 8 | 3010.5744 | 3010.5739 | 0.0005  |
| 9  | 0 | 9  | 8 | 0 | 8 | 3026.5362 | 3026.5380 | -0.0018 |
| 9  | 6 | 4  | 8 | 6 | 3 | 3028.6583 | 3028.6580 | 0.0003  |
| 9  | 6 | 3  | 8 | 6 | 2 | 3028.6583 | 3028.658  | 0.0003  |
| 9  | 5 | 5  | 8 | 5 | 4 | 3028.6627 | 3028.6621 | 0.0006  |
| 9  | 5 | 4  | 8 | 5 | 3 | 3028.6627 | 3028.6621 | 0.0006  |
| 9  | 7 | 3  | 8 | 7 | 2 | 3028.6687 | 3028.6687 | 0.0000  |
| 9  | 7 | 2  | 8 | 7 | 1 | 3028.6687 | 3028.6687 | 0.0000  |
| 9  | 4 | 5  | 8 | 4 | 4 | 3028.6951 | 3028.6940 | 0.0011  |
| 9  | 4 | 6  | 8 | 4 | 5 | 3028.6951 | 3028.6939 | 0.0012  |



|    |   |    |    |   |    |           |           |         |
|----|---|----|----|---|----|-----------|-----------|---------|
| 9  | 3 | 7  | 8  | 3 | 6  | 3028.7859 | 3028.7864 | -0.0005 |
| 9  | 3 | 6  | 8  | 3 | 5  | 3028.8058 | 3028.8065 | -0.0007 |
| 9  | 2 | 7  | 8  | 2 | 6  | 3030.1843 | 3030.1828 | 0.0015  |
| 9  | 1 | 8  | 8  | 1 | 7  | 3045.4892 | 3045.4893 | -0.0001 |
| 3  | 2 | 2  | 2  | 1 | 1  | 3067.2245 | 3067.2213 | 0.0032  |
| 3  | 2 | 1  | 2  | 1 | 2  | 3078.9504 | 3078.9514 | -0.0010 |
| 7  | 1 | 6  | 6  | 0 | 6  | 3098.4206 | 3098.4184 | 0.0022  |
| 11 | 0 | 11 | 10 | 1 | 10 | 3110.5206 | 3110.5208 | -0.0002 |
| 8  | 1 | 8  | 7  | 0 | 7  | 3311.2767 | 3311.2775 | -0.0008 |
| 10 | 1 | 10 | 9  | 1 | 9  | 3344.9260 | 3344.9269 | -0.0009 |
| 10 | 0 | 10 | 9  | 0 | 9  | 3362.2766 | 3362.2732 | 0.0034  |
| 10 | 2 | 9  | 9  | 2 | 8  | 3364.5643 | 3364.5655 | -0.0012 |
| 10 | 6 | 5  | 9  | 6 | 4  | 3365.1576 | 3365.1581 | -0.0005 |
| 10 | 6 | 4  | 9  | 6 | 3  | 3365.1576 | 3365.1581 | -0.0005 |
| 10 | 7 | 4  | 9  | 7 | 3  | 3365.1659 | 3365.1659 | 0.0000  |
| 10 | 7 | 3  | 9  | 7 | 2  | 3365.1659 | 3365.1659 | 0.0000  |
| 10 | 5 | 6  | 9  | 5 | 5  | 3365.1699 | 3365.1695 | 0.0004  |
| 10 | 5 | 5  | 9  | 5 | 4  | 3365.1699 | 3365.1695 | 0.0004  |
| 10 | 8 | 2  | 9  | 8 | 1  | 3365.1859 | 3365.1858 | 0.0001  |
| 10 | 8 | 3  | 9  | 8 | 2  | 3365.1859 | 3365.1858 | 0.0001  |
| 10 | 4 | 7  | 9  | 4 | 6  | 3365.2186 | 3365.2178 | 0.0008  |
| 10 | 4 | 6  | 9  | 4 | 5  | 3365.2186 | 3365.2180 | 0.0006  |
| 10 | 3 | 8  | 9  | 3 | 7  | 3365.3440 | 3365.3449 | -0.0009 |
| 10 | 3 | 7  | 9  | 3 | 6  | 3365.3794 | 3365.3793 | 0.0001  |
| 10 | 2 | 8  | 9  | 2 | 7  | 3367.2630 | 3367.2654 | -0.0024 |
| 10 | 1 | 9  | 9  | 1 | 8  | 3383.7040 | 3383.7074 | -0.0034 |
| 4  | 2 | 3  | 3  | 1 | 2  | 3397.9084 | 3397.9057 | 0.0027  |
| 15 | 3 | 12 | 15 | 2 | 13 | 3412.4134 | 3412.4138 | -0.0004 |
| 14 | 3 | 11 | 14 | 2 | 12 | 3418.5862 | 3418.5859 | 0.0003  |
| 4  | 2 | 2  | 3  | 1 | 3  | 3421.4479 | 3421.4480 | -0.0001 |
| 13 | 3 | 10 | 13 | 2 | 11 | 3423.6509 | 3423.6529 | -0.0020 |
| 12 | 3 | 9  | 12 | 2 | 10 | 3427.7417 | 3427.7417 | 0.0000  |
| 11 | 3 | 8  | 11 | 2 | 9  | 3430.9761 | 3430.9774 | -0.0013 |
| 10 | 3 | 7  | 10 | 2 | 8  | 3433.4798 | 3433.4807 | -0.0009 |
| 9  | 3 | 6  | 9  | 2 | 7  | 3435.3668 | 3435.3668 | 0.0000  |
| 8  | 3 | 6  | 8  | 2 | 6  | 3436.7238 | 3436.7230 | 0.0008  |
| 8  | 3 | 5  | 8  | 2 | 6  | 3436.7419 | 3436.7431 | -0.0012 |
| 7  | 3 | 5  | 7  | 2 | 5  | 3437.6996 | 3437.6995 | 0.0001  |
| 7  | 3 | 4  | 7  | 2 | 5  | 3437.7082 | 3437.7087 | -0.0005 |
| 6  | 3 | 4  | 6  | 2 | 4  | 3438.3493 | 3438.3495 | -0.0002 |

|    |   |    |    |   |    |           |           |         |
|----|---|----|----|---|----|-----------|-----------|---------|
| 6  | 3 | 3  | 6  | 2 | 4  | 3438.3535 | 3438.3532 | 0.0003  |
| 5  | 3 | 3  | 5  | 2 | 3  | 3438.7551 | 3438.7547 | 0.0004  |
| 5  | 3 | 2  | 5  | 2 | 3  | 3438.7551 | 3438.7559 | -0.0008 |
| 4  | 3 | 2  | 4  | 2 | 2  | 3438.9878 | 3438.9852 | 0.0026  |
| 4  | 3 | 1  | 4  | 2 | 2  | 3438.9878 | 3438.9855 | 0.0023  |
| 5  | 3 | 2  | 5  | 2 | 4  | 3439.3311 | 3439.3313 | -0.0002 |
| 5  | 3 | 3  | 5  | 2 | 4  | 3439.3311 | 3439.3301 | 0.0010  |
| 6  | 3 | 4  | 6  | 2 | 5  | 3439.5018 | 3439.5000 | 0.0018  |
| 6  | 3 | 3  | 6  | 2 | 5  | 3439.5018 | 3439.5036 | -0.0018 |
| 7  | 3 | 5  | 7  | 2 | 6  | 3439.7694 | 3439.7696 | -0.0002 |
| 7  | 3 | 4  | 7  | 2 | 6  | 3439.7789 | 3439.7788 | 0.0001  |
| 8  | 3 | 6  | 8  | 2 | 7  | 3440.1709 | 3440.1713 | -0.0004 |
| 9  | 3 | 7  | 9  | 2 | 8  | 3440.7418 | 3440.7417 | 0.0001  |
| 10 | 3 | 8  | 10 | 2 | 9  | 3441.5211 | 3441.5211 | 0.0000  |
| 11 | 3 | 9  | 11 | 2 | 10 | 3442.5535 | 3442.5540 | -0.0005 |
| 12 | 3 | 10 | 12 | 2 | 11 | 3443.8894 | 3443.8883 | 0.0011  |
| 13 | 3 | 11 | 13 | 2 | 12 | 3445.5748 | 3445.5753 | -0.0005 |
| 14 | 3 | 12 | 14 | 2 | 13 | 3447.6695 | 3447.6694 | 0.0001  |
| 15 | 3 | 13 | 15 | 2 | 14 | 3450.2276 | 3450.2280 | -0.0004 |
| 8  | 1 | 7  | 7  | 0 | 7  | 3451.0163 | 3451.0186 | -0.0023 |
| 16 | 3 | 14 | 16 | 2 | 15 | 3453.3107 | 3453.3108 | -0.0001 |
| 17 | 3 | 15 | 17 | 2 | 16 | 3456.9792 | 3456.9800 | -0.0008 |
| 18 | 3 | 16 | 18 | 2 | 17 | 3461.2982 | 3461.2997 | -0.0015 |
| 12 | 0 | 12 | 11 | 1 | 11 | 3464.5096 | 3464.5093 | 0.0003  |
| 19 | 3 | 17 | 19 | 2 | 18 | 3466.3355 | 3466.3357 | -0.0002 |
| 20 | 3 | 18 | 20 | 2 | 19 | 3472.1557 | 3472.1550 | 0.0007  |
| 9  | 1 | 9  | 8  | 0 | 8  | 3631.1998 | 3631.2024 | -0.0026 |
| 11 | 1 | 11 | 10 | 1 | 10 | 3679.2328 | 3679.2325 | 0.0003  |
| 11 | 0 | 11 | 10 | 0 | 10 | 3697.8386 | 3697.839  | -0.0004 |
| 11 | 2 | 10 | 10 | 2 | 9  | 3700.8746 | 3700.8773 | -0.0027 |
| 11 | 6 | 5  | 10 | 6 | 4  | 3701.6523 | 3701.6527 | -0.0004 |
| 11 | 6 | 6  | 10 | 6 | 5  | 3701.6523 | 3701.6527 | -0.0004 |
| 11 | 7 | 4  | 10 | 7 | 3  | 3701.6567 | 3701.6564 | 0.0003  |
| 11 | 7 | 5  | 10 | 7 | 4  | 3701.6567 | 3701.6564 | 0.0003  |
| 11 | 5 | 6  | 10 | 5 | 5  | 3701.6753 | 3701.6735 | 0.0018  |
| 11 | 5 | 7  | 10 | 5 | 6  | 3701.6753 | 3701.6735 | 0.0018  |
| 11 | 4 | 8  | 10 | 4 | 7  | 3701.7426 | 3701.7424 | 0.0002  |
| 11 | 4 | 7  | 10 | 4 | 6  | 3701.7426 | 3701.7427 | -0.0001 |
| 11 | 3 | 9  | 10 | 3 | 8  | 3701.9066 | 3701.9102 | -0.0036 |
| 11 | 3 | 8  | 10 | 3 | 7  | 3701.9651 | 3701.9662 | -0.0011 |

|    |   |    |    |   |    |           |           |         |
|----|---|----|----|---|----|-----------|-----------|---------|
| 11 | 2 | 9  | 10 | 2 | 8  | 3704.4686 | 3704.4695 | -0.0009 |
| 11 | 1 | 10 | 10 | 1 | 9  | 3721.8702 | 3721.8703 | -0.0001 |
| 5  | 2 | 4  | 4  | 1 | 3  | 3726.6449 | 3726.6446 | 0.0003  |
| 5  | 2 | 4  | 4  | 1 | 4  | 3765.4691 | 3765.4699 | -0.0008 |
| 5  | 2 | 3  | 4  | 1 | 4  | 3766.0442 | 3766.0453 | -0.0011 |
| 13 | 0 | 13 | 12 | 1 | 12 | 3819.4314 | 3819.4285 | 0.0029  |
| 6  | 5 | 2  | 7  | 4 | 4  | 3834.8055 | 3834.8051 | 0.0004  |
| 6  | 5 | 1  | 7  | 4 | 4  | 3834.8055 | 3834.8051 | 0.0004  |
| 6  | 5 | 2  | 7  | 4 | 3  | 3834.8055 | 3834.8051 | 0.0004  |
| 6  | 5 | 1  | 7  | 4 | 3  | 3834.8055 | 3834.8051 | 0.0004  |
| 19 | 1 | 19 | 18 | 2 | 16 | 3872.7705 | 3872.7702 | 0.0003  |
| 14 | 7 | 8  | 15 | 6 | 10 | 3894.1702 | 3894.1703 | -0.0001 |
| 14 | 7 | 7  | 15 | 6 | 10 | 3894.1702 | 3894.1703 | -0.0001 |
| 14 | 7 | 8  | 15 | 6 | 9  | 3894.1702 | 3894.1703 | -0.0001 |
| 14 | 7 | 7  | 15 | 6 | 9  | 3894.1702 | 3894.1703 | -0.0001 |
| 17 | 1 | 16 | 16 | 2 | 14 | 3895.1622 | 3895.1629 | -0.0007 |
| 10 | 1 | 10 | 9  | 0 | 9  | 3949.5886 | 3949.5913 | -0.0027 |
| 12 | 1 | 12 | 11 | 1 | 11 | 4013.4868 | 4013.4869 | -0.0001 |
| 12 | 0 | 12 | 11 | 0 | 11 | 4033.2204 | 4033.2210 | -0.0006 |
| 12 | 2 | 11 | 11 | 2 | 10 | 4037.1467 | 4037.1479 | -0.0012 |
| 12 | 7 | 6  | 11 | 7 | 5  | 4038.1406 | 4038.1394 | 0.0012  |
| 12 | 7 | 5  | 11 | 7 | 4  | 4038.1406 | 4038.1394 | 0.0012  |
| 12 | 6 | 6  | 11 | 6 | 5  | 4038.1406 | 4038.1412 | -0.0006 |
| 12 | 6 | 7  | 11 | 6 | 6  | 4038.1406 | 4038.1412 | -0.0006 |
| 12 | 8 | 5  | 11 | 8 | 4  | 4038.1557 | 4038.1561 | -0.0004 |
| 12 | 8 | 4  | 11 | 8 | 3  | 4038.1557 | 4038.1561 | -0.0004 |
| 12 | 5 | 8  | 11 | 5 | 7  | 4038.1737 | 4038.1738 | -0.0001 |
| 12 | 5 | 7  | 11 | 5 | 6  | 4038.1737 | 4038.1738 | -0.0001 |
| 12 | 4 | 9  | 11 | 4 | 8  | 4038.2688 | 4038.2677 | 0.0011  |
| 12 | 4 | 8  | 11 | 4 | 7  | 4038.2688 | 4038.2683 | 0.0005  |
| 12 | 3 | 10 | 11 | 3 | 9  | 4038.4821 | 4038.4821 | 0.0000  |
| 12 | 3 | 9  | 11 | 3 | 8  | 4038.5691 | 4038.5691 | 0.0000  |
| 12 | 2 | 10 | 11 | 2 | 9  | 4041.8046 | 4041.8048 | -0.0002 |
| 6  | 2 | 5  | 5  | 1 | 4  | 4053.4424 | 4053.4399 | 0.0025  |
| 12 | 1 | 11 | 11 | 1 | 10 | 4059.9713 | 4059.9716 | -0.0003 |
| 6  | 2 | 4  | 5  | 1 | 5  | 4112.8253 | 4112.8267 | -0.0014 |
| 10 | 1 | 9  | 9  | 0 | 9  | 4163.0263 | 4163.0284 | -0.0021 |
| 14 | 0 | 14 | 13 | 1 | 13 | 4175.1237 | 4175.1249 | -0.0012 |
| 11 | 1 | 11 | 10 | 0 | 10 | 4266.5482 | 4266.5507 | -0.0025 |
| 13 | 1 | 13 | 12 | 1 | 12 | 4347.689  | 4347.6863 | 0.0027  |

|    |   |    |    |   |    |           |           |         |
|----|---|----|----|---|----|-----------|-----------|---------|
| 13 | 2 | 12 | 12 | 2 | 11 | 4373.3757 | 4373.3734 | 0.0023  |
| 13 | 7 | 7  | 12 | 7 | 6  | 4374.6143 | 4374.6143 | 0.0000  |
| 13 | 7 | 6  | 12 | 7 | 5  | 4374.6143 | 4374.6143 | 0.0000  |
| 13 | 6 | 7  | 12 | 6 | 6  | 4374.6232 | 4374.6231 | 0.0001  |
| 13 | 6 | 8  | 12 | 6 | 7  | 4374.6232 | 4374.6231 | 0.0001  |
| 13 | 8 | 5  | 12 | 8 | 4  | 4374.6279 | 4374.6279 | 0.0000  |
| 13 | 8 | 6  | 12 | 8 | 5  | 4374.6279 | 4374.6279 | 0.0000  |
| 13 | 5 | 9  | 12 | 5 | 8  | 4374.6718 | 4374.6700 | 0.0018  |
| 13 | 5 | 8  | 12 | 5 | 7  | 4374.6718 | 4374.6700 | 0.0018  |
| 13 | 4 | 10 | 12 | 4 | 9  | 4374.7962 | 4374.7938 | 0.0024  |
| 13 | 4 | 9  | 12 | 4 | 8  | 4374.7962 | 4374.7949 | 0.0013  |
| 13 | 3 | 11 | 12 | 3 | 10 | 4375.063  | 4375.0604 | 0.0026  |
| 13 | 3 | 10 | 12 | 3 | 9  | 4375.1922 | 4375.1908 | 0.0014  |
| 7  | 2 | 6  | 6  | 1 | 5  | 4378.2959 | 4378.2954 | 0.0005  |
| 13 | 2 | 11 | 12 | 2 | 10 | 4379.2793 | 4379.2797 | -0.0004 |
| 13 | 1 | 12 | 12 | 1 | 11 | 4398.0046 | 4398.0048 | -0.0002 |
| 3  | 3 | 1  | 2  | 2 | 0  | 4448.7061 | 4448.7062 | -0.0001 |
| 3  | 3 | 0  | 2  | 2 | 0  | 4448.7061 | 4448.7062 | -0.0001 |
| 3  | 3 | 0  | 2  | 2 | 1  | 4448.7227 | 4448.7227 | 0.0000  |
| 3  | 3 | 1  | 2  | 2 | 1  | 4448.7227 | 4448.7226 | 0.0001  |
| 7  | 2 | 5  | 6  | 1 | 6  | 4461.8928 | 4461.8929 | -0.0001 |
| 15 | 0 | 15 | 14 | 1 | 14 | 4531.4382 | 4531.4385 | -0.0003 |
| 12 | 1 | 12 | 11 | 0 | 11 | 4582.1961 | 4582.1986 | -0.0025 |
| 14 | 1 | 14 | 13 | 1 | 13 | 4681.8250 | 4681.8272 | -0.0022 |
| 8  | 2 | 7  | 7  | 1 | 6  | 4701.2166 | 4701.2165 | 0.0001  |
| 14 | 0 | 14 | 13 | 0 | 13 | 4703.3831 | 4703.3827 | 0.0004  |
| 14 | 2 | 13 | 13 | 2 | 12 | 4709.5478 | 4709.5503 | -0.0025 |
| 14 | 7 | 7  | 13 | 7 | 6  | 4711.0798 | 4711.0803 | -0.0005 |
| 14 | 7 | 8  | 13 | 7 | 7  | 4711.0798 | 4711.0803 | -0.0005 |
| 14 | 8 | 7  | 13 | 8 | 6  | 4711.0901 | 4711.0898 | 0.0003  |
| 14 | 8 | 6  | 13 | 8 | 5  | 4711.0901 | 4711.0898 | 0.0003  |
| 14 | 6 | 8  | 13 | 6 | 7  | 4711.0974 | 4711.0978 | -0.0004 |
| 14 | 6 | 9  | 13 | 6 | 8  | 4711.0974 | 4711.0978 | -0.0004 |
| 14 | 9 | 6  | 13 | 9 | 5  | 4711.1177 | 4711.1176 | 0.0001  |
| 14 | 9 | 5  | 13 | 9 | 4  | 4711.1177 | 4711.1176 | 0.0001  |
| 14 | 5 | 9  | 13 | 5 | 8  | 4711.1631 | 4711.1619 | 0.0012  |
| 14 | 5 | 10 | 13 | 5 | 9  | 4711.1631 | 4711.1619 | 0.0012  |
| 14 | 4 | 11 | 13 | 4 | 10 | 4711.3222 | 4711.3207 | 0.0015  |
| 14 | 4 | 10 | 13 | 4 | 9  | 4711.3222 | 4711.3226 | -0.0004 |
| 14 | 3 | 12 | 13 | 3 | 11 | 4711.6438 | 4711.6444 | -0.0006 |

|    |   |    |    |   |    |           |           |         |
|----|---|----|----|---|----|-----------|-----------|---------|
| 14 | 3 | 11 | 13 | 3 | 10 | 4711.8346 | 4711.8339 | 0.0007  |
| 14 | 2 | 12 | 13 | 2 | 11 | 4716.9007 | 4716.9009 | -0.0002 |
| 14 | 1 | 13 | 13 | 1 | 12 | 4735.9606 | 4735.9628 | -0.0022 |
| 4  | 3 | 2  | 3  | 2 | 1  | 4785.1868 | 4785.1865 | 0.0003  |
| 4  | 3 | 1  | 3  | 2 | 1  | 4785.1868 | 4785.1868 | 0.0000  |
| 4  | 3 | 2  | 3  | 2 | 2  | 4785.2697 | 4785.2687 | 0.0010  |
| 4  | 3 | 1  | 3  | 2 | 2  | 4785.2697 | 4785.2690 | 0.0007  |
| 20 | 4 | 16 | 20 | 3 | 17 | 4805.9052 | 4805.9056 | -0.0004 |
| 18 | 4 | 14 | 18 | 3 | 15 | 4809.2241 | 4809.2242 | -0.0001 |
| 20 | 4 | 17 | 20 | 3 | 18 | 4810.1935 | 4810.1931 | 0.0004  |
| 17 | 4 | 13 | 17 | 3 | 14 | 4810.4631 | 4810.4628 | 0.0003  |
| 19 | 4 | 16 | 19 | 3 | 17 | 4810.8983 | 4810.8979 | 0.0004  |
| 16 | 4 | 12 | 16 | 3 | 13 | 4811.4733 | 4811.4728 | 0.0005  |
| 18 | 4 | 15 | 18 | 3 | 16 | 4811.5435 | 4811.5425 | 0.0010  |
| 17 | 4 | 14 | 17 | 3 | 15 | 4812.1215 | 4812.1229 | -0.0014 |
| 15 | 4 | 11 | 15 | 3 | 12 | 4812.2891 | 4812.2878 | 0.0013  |
| 16 | 4 | 13 | 16 | 3 | 14 | 4812.6366 | 4812.6375 | -0.0009 |
| 14 | 4 | 11 | 14 | 3 | 11 | 4812.9328 | 4812.9336 | -0.0008 |
| 14 | 4 | 10 | 14 | 3 | 11 | 4812.9376 | 4812.9377 | -0.0001 |
| 15 | 4 | 12 | 15 | 3 | 13 | 4813.0863 | 4813.0864 | -0.0001 |
| 8  | 2 | 6  | 7  | 1 | 7  | 4813.3591 | 4813.3616 | -0.0025 |
| 13 | 4 | 9  | 13 | 3 | 10 | 4813.4488 | 4813.4491 | -0.0003 |
| 14 | 4 | 11 | 14 | 3 | 12 | 4813.4711 | 4813.4711 | 0.0000  |
| 11 | 4 | 8  | 11 | 3 | 9  | 4814.2761 | 4814.2758 | 0.0003  |
| 11 | 4 | 7  | 11 | 3 | 9  | 4814.2761 | 4814.2765 | -0.0004 |
| 10 | 4 | 7  | 10 | 3 | 7  | 4814.3691 | 4814.369  | 0.0001  |
| 10 | 4 | 6  | 10 | 3 | 7  | 4814.3691 | 4814.3693 | -0.0002 |
| 10 | 4 | 6  | 10 | 3 | 8  | 4814.4438 | 4814.444  | -0.0002 |
| 10 | 4 | 7  | 10 | 3 | 8  | 4814.4438 | 4814.4437 | 0.0001  |
| 9  | 4 | 6  | 9  | 3 | 7  | 4814.5705 | 4814.5708 | -0.0003 |
| 9  | 4 | 5  | 9  | 3 | 7  | 4814.5705 | 4814.5709 | -0.0004 |
| 8  | 4 | 5  | 8  | 3 | 5  | 4814.6431 | 4814.6431 | 0.0000  |
| 8  | 4 | 4  | 8  | 3 | 5  | 4814.6431 | 4814.6432 | -0.0001 |
| 6  | 4 | 2  | 6  | 3 | 3  | 4814.7646 | 4814.7646 | 0.0000  |
| 6  | 4 | 3  | 6  | 3 | 3  | 4814.7646 | 4814.7646 | 0.0000  |
| 6  | 4 | 2  | 6  | 3 | 4  | 4814.7682 | 4814.7682 | 0.0000  |
| 6  | 4 | 3  | 6  | 3 | 4  | 4814.7682 | 4814.7682 | 0.0000  |
| 4  | 4 | 0  | 4  | 3 | 2  | 4814.8039 | 4814.8039 | 0.0000  |
| 4  | 4 | 1  | 4  | 3 | 1  | 4814.8039 | 4814.8036 | 0.0003  |
| 4  | 4 | 0  | 4  | 3 | 1  | 4814.8039 | 4814.8036 | 0.0003  |

|    |   |    |    |   |    |           |           |         |
|----|---|----|----|---|----|-----------|-----------|---------|
| 4  | 4 | 1  | 4  | 3 | 2  | 4814.8039 | 4814.8039 | 0.0000  |
| 16 | 0 | 16 | 15 | 1 | 15 | 4888.2054 | 4888.2048 | 0.0006  |
| 13 | 1 | 13 | 12 | 0 | 12 | 4896.6652 | 4896.6639 | 0.0013  |
| 15 | 1 | 15 | 14 | 1 | 14 | 5015.9073 | 5015.9065 | 0.0008  |
| 9  | 2 | 8  | 8  | 1 | 7  | 5022.2124 | 5022.2104 | 0.0020  |
| 15 | 0 | 15 | 14 | 0 | 14 | 5038.1379 | 5038.1408 | -0.0029 |
| 15 | 2 | 14 | 14 | 2 | 13 | 5045.6757 | 5045.6747 | 0.0010  |
| 15 | 7 | 9  | 14 | 7 | 8  | 5047.5372 | 5047.5368 | 0.0004  |
| 15 | 7 | 8  | 14 | 7 | 7  | 5047.5372 | 5047.5368 | 0.0004  |
| 15 | 8 | 8  | 14 | 8 | 7  | 5047.5411 | 5047.5411 | 0.0000  |
| 15 | 8 | 7  | 14 | 8 | 6  | 5047.5411 | 5047.5411 | 0.0000  |
| 15 | 6 | 9  | 14 | 6 | 8  | 5047.5661 | 5047.5648 | 0.0013  |
| 15 | 6 | 10 | 14 | 6 | 9  | 5047.5661 | 5047.5648 | 0.0013  |
| 15 | 5 | 11 | 14 | 5 | 10 | 5047.6499 | 5047.6490 | 0.0009  |
| 15 | 5 | 10 | 14 | 5 | 9  | 5047.6499 | 5047.6490 | 0.0009  |
| 15 | 4 | 12 | 14 | 4 | 11 | 5047.8499 | 5047.8485 | 0.0014  |
| 15 | 4 | 11 | 14 | 4 | 10 | 5047.8499 | 5047.8515 | -0.0016 |
| 15 | 3 | 13 | 14 | 3 | 12 | 5048.2322 | 5048.2333 | -0.0011 |
| 15 | 3 | 12 | 14 | 3 | 11 | 5048.5003 | 5048.5015 | -0.0012 |
| 15 | 2 | 13 | 14 | 2 | 12 | 5054.6759 | 5054.6736 | 0.0023  |
| 15 | 1 | 14 | 14 | 1 | 13 | 5073.8375 | 5073.8386 | -0.0011 |
| 5  | 3 | 3  | 4  | 2 | 2  | 5121.5979 | 5121.6012 | -0.0033 |
| 5  | 3 | 2  | 4  | 2 | 2  | 5121.5994 | 5121.6024 | -0.0030 |
| 5  | 3 | 3  | 4  | 2 | 3  | 5121.8492 | 5121.8478 | 0.0014  |
| 5  | 3 | 2  | 4  | 2 | 3  | 5121.8492 | 5121.8491 | 0.0001  |
| 9  | 2 | 7  | 8  | 1 | 8  | 5167.3662 | 5167.3667 | -0.0005 |
| 14 | 1 | 14 | 13 | 0 | 13 | 5210.0839 | 5210.0850 | -0.0011 |
| 17 | 0 | 17 | 16 | 1 | 16 | 5245.2597 | 5245.2572 | 0.0025  |
| 10 | 2 | 9  | 9  | 1 | 8  | 5341.2901 | 5341.2866 | 0.0035  |
| 16 | 1 | 16 | 15 | 1 | 15 | 5349.9222 | 5349.9212 | 0.0010  |
| 16 | 0 | 16 | 15 | 0 | 15 | 5372.6760 | 5372.6729 | 0.0031  |
| 16 | 2 | 15 | 15 | 2 | 14 | 5381.7415 | 5381.7431 | -0.0016 |
| 16 | 8 | 8  | 15 | 8 | 7  | 5383.9809 | 5383.9810 | -0.0001 |
| 16 | 8 | 9  | 15 | 8 | 8  | 5383.9809 | 5383.9810 | -0.0001 |
| 16 | 7 | 9  | 15 | 7 | 8  | 5383.9824 | 5383.9831 | -0.0007 |
| 16 | 7 | 10 | 15 | 7 | 9  | 5383.9832 | 5383.9831 | 0.0000  |
| 16 | 5 | 12 | 15 | 5 | 11 | 5384.1314 | 5384.1311 | 0.0003  |
| 16 | 5 | 11 | 15 | 5 | 10 | 5384.1314 | 5384.1311 | 0.0003  |
| 16 | 4 | 12 | 15 | 4 | 11 | 5384.3798 | 5384.3819 | -0.0021 |
| 16 | 4 | 13 | 15 | 4 | 12 | 5384.3798 | 5384.3771 | 0.0027  |

|    |   |    |    |   |    |           |           |         |
|----|---|----|----|---|----|-----------|-----------|---------|
| 16 | 3 | 14 | 15 | 3 | 13 | 5384.8258 | 5384.8259 | -0.0001 |
| 16 | 3 | 13 | 15 | 3 | 12 | 5385.1975 | 5385.1969 | 0.0006  |
| 16 | 2 | 14 | 15 | 2 | 13 | 5392.6003 | 5392.6005 | -0.0002 |
| 16 | 1 | 15 | 15 | 1 | 14 | 5411.6256 | 5411.6247 | 0.0009  |
| 6  | 3 | 4  | 5  | 2 | 3  | 5457.9042 | 5457.9046 | -0.0004 |
| 6  | 3 | 3  | 5  | 2 | 3  | 5457.9084 | 5457.9082 | 0.0002  |
| 6  | 3 | 4  | 5  | 2 | 4  | 5458.4803 | 5458.4799 | 0.0004  |
| 6  | 3 | 3  | 5  | 2 | 4  | 5458.4837 | 5458.4836 | 0.0001  |
| 15 | 1 | 15 | 14 | 0 | 14 | 5522.6101 | 5522.6089 | 0.0012  |
| 10 | 2 | 8  | 9  | 1 | 9  | 5524.0571 | 5524.0581 | -0.0010 |
| 10 | 2 | 8  | 9  | 1 | 9  | 5524.0571 | 5524.0581 | -0.0010 |
| 18 | 0 | 18 | 17 | 1 | 17 | 5602.4274 | 5602.4290 | -0.0016 |
| 11 | 2 | 10 | 10 | 1 | 9  | 5658.4556 | 5658.4564 | -0.0008 |
| 17 | 1 | 17 | 16 | 1 | 16 | 5683.8688 | 5683.8686 | 0.0002  |
| 17 | 0 | 17 | 16 | 0 | 16 | 5706.9760 | 5706.9736 | 0.0024  |
| 17 | 2 | 16 | 16 | 2 | 15 | 5717.7500 | 5717.7518 | -0.0018 |
| 17 | 7 | 11 | 16 | 7 | 10 | 5720.4167 | 5720.4186 | -0.0019 |
| 17 | 7 | 10 | 16 | 7 | 9  | 5720.4167 | 5720.4186 | -0.0019 |
| 17 | 6 | 12 | 16 | 6 | 11 | 5720.4749 | 5720.4734 | 0.0015  |
| 17 | 6 | 11 | 16 | 6 | 10 | 5720.4749 | 5720.4734 | 0.0015  |
| 17 | 5 | 12 | 16 | 5 | 11 | 5720.6081 | 5720.6078 | 0.0003  |
| 17 | 5 | 13 | 16 | 5 | 12 | 5720.6081 | 5720.6077 | 0.0004  |
| 17 | 4 | 14 | 16 | 4 | 13 | 5720.9072 | 5720.9064 | 0.0008  |
| 17 | 4 | 13 | 16 | 4 | 12 | 5720.9135 | 5720.9138 | -0.0003 |
| 17 | 3 | 15 | 16 | 3 | 14 | 5721.4209 | 5721.4210 | -0.0001 |
| 17 | 3 | 14 | 16 | 3 | 13 | 5721.9239 | 5721.9238 | 0.0001  |
| 17 | 2 | 15 | 16 | 2 | 14 | 5730.6822 | 5730.6820 | 0.0002  |
| 17 | 1 | 16 | 16 | 1 | 15 | 5749.3120 | 5749.3133 | -0.0013 |
| 7  | 3 | 5  | 6  | 2 | 4  | 5794.0375 | 5794.0388 | -0.0013 |
| 7  | 3 | 5  | 6  | 2 | 5  | 5795.1899 | 5795.1892 | 0.0007  |
| 7  | 3 | 4  | 6  | 2 | 5  | 5795.1983 | 5795.1983 | 0.0000  |
| 16 | 1 | 16 | 15 | 0 | 15 | 5834.3876 | 5834.3893 | -0.0017 |
| 11 | 2 | 9  | 10 | 1 | 10 | 5883.6022 | 5883.6007 | 0.0015  |
| 19 | 0 | 19 | 18 | 1 | 18 | 5959.5543 | 5959.5563 | -0.0020 |
| 12 | 2 | 11 | 11 | 1 | 10 | 5973.7346 | 5973.7340 | 0.0006  |
| 18 | 1 | 18 | 17 | 1 | 17 | 6017.7464 | 6017.7464 | 0.0000  |
| 18 | 0 | 18 | 17 | 0 | 17 | 6041.0380 | 6041.0404 | -0.0024 |
| 18 | 2 | 17 | 17 | 2 | 16 | 6053.6964 | 6053.6973 | -0.0009 |
| 18 | 8 | 10 | 17 | 8 | 9  | 6056.8241 | 6056.8236 | 0.0005  |
| 18 | 8 | 11 | 17 | 8 | 10 | 6056.8241 | 6056.8236 | 0.0005  |

|    |   |    |    |   |    |           |           |         |
|----|---|----|----|---|----|-----------|-----------|---------|
| 18 | 9 | 9  | 17 | 9 | 8  | 6056.8388 | 6056.8380 | 0.0008  |
| 18 | 9 | 10 | 17 | 9 | 9  | 6056.8388 | 6056.8380 | 0.0008  |
| 18 | 7 | 12 | 17 | 7 | 11 | 6056.8438 | 6056.8425 | 0.0013  |
| 18 | 7 | 11 | 17 | 7 | 10 | 6056.8438 | 6056.8425 | 0.0013  |
| 18 | 6 | 12 | 17 | 6 | 11 | 6056.9143 | 6056.9138 | 0.0005  |
| 18 | 6 | 13 | 17 | 6 | 12 | 6056.9143 | 6056.9138 | 0.0005  |
| 18 | 5 | 13 | 17 | 5 | 12 | 6057.0773 | 6057.0787 | -0.0014 |
| 18 | 5 | 14 | 17 | 5 | 13 | 6057.0773 | 6057.0787 | -0.0014 |
| 18 | 4 | 15 | 17 | 4 | 14 | 6057.4365 | 6057.4365 | 0.0000  |
| 18 | 4 | 14 | 17 | 4 | 13 | 6057.4475 | 6057.4476 | -0.0001 |
| 18 | 3 | 16 | 17 | 3 | 15 | 6058.0187 | 6058.0170 | 0.0017  |
| 18 | 3 | 15 | 17 | 3 | 14 | 6058.6877 | 6058.6862 | 0.0015  |
| 18 | 2 | 16 | 17 | 2 | 15 | 6068.915  | 6068.9157 | -0.0007 |
| 18 | 1 | 17 | 17 | 1 | 16 | 6086.8968 | 6086.8963 | 0.0005  |
| 8  | 3 | 6  | 7  | 2 | 5  | 6129.9341 | 6129.9341 | 0.0000  |
| 8  | 3 | 5  | 7  | 2 | 5  | 6129.9541 | 6129.9542 | -0.0001 |
| 8  | 3 | 6  | 7  | 2 | 6  | 6132.0048 | 6132.0042 | 0.0006  |
| 8  | 3 | 5  | 7  | 2 | 6  | 6132.0254 | 6132.0243 | 0.0011  |
| 17 | 1 | 17 | 16 | 0 | 16 | 6145.5826 | 6145.5850 | -0.0024 |
| 4  | 4 | 1  | 3  | 3 | 1  | 6160.8909 | 6160.8907 | 0.0002  |
| 4  | 4 | 1  | 3  | 3 | 0  | 6160.8909 | 6160.8907 | 0.0002  |
| 4  | 4 | 0  | 3  | 3 | 0  | 6160.8909 | 6160.8907 | 0.0002  |
| 4  | 4 | 0  | 3  | 3 | 1  | 6160.8909 | 6160.8907 | 0.0002  |
| 12 | 2 | 10 | 11 | 1 | 11 | 6246.1709 | 6246.1730 | -0.0021 |
| 13 | 2 | 12 | 12 | 1 | 11 | 6287.1365 | 6287.1357 | 0.0008  |
| 19 | 1 | 19 | 18 | 1 | 18 | 6351.5501 | 6351.5523 | -0.0022 |
| 19 | 0 | 19 | 18 | 0 | 18 | 6374.8755 | 6374.8737 | 0.0018  |
| 19 | 2 | 18 | 18 | 2 | 17 | 6389.5747 | 6389.5758 | -0.0011 |
| 19 | 8 | 11 | 18 | 8 | 10 | 6393.2239 | 6393.2246 | -0.0007 |
| 19 | 8 | 12 | 18 | 8 | 11 | 6393.2239 | 6393.2246 | -0.0007 |
| 19 | 7 | 12 | 18 | 7 | 11 | 6393.2533 | 6393.2542 | -0.0009 |
| 19 | 7 | 13 | 18 | 7 | 12 | 6393.2533 | 6393.2542 | -0.0009 |
| 19 | 6 | 14 | 18 | 6 | 13 | 6393.3447 | 6393.3443 | 0.0004  |
| 19 | 6 | 13 | 18 | 6 | 12 | 6393.3447 | 6393.3443 | 0.0004  |
| 19 | 5 | 14 | 18 | 5 | 13 | 6393.5437 | 6393.5436 | 0.0001  |
| 19 | 5 | 15 | 18 | 5 | 14 | 6393.5437 | 6393.5435 | 0.0002  |
| 19 | 4 | 16 | 18 | 4 | 15 | 6393.9669 | 6393.9673 | -0.0004 |
| 19 | 4 | 15 | 18 | 4 | 14 | 6393.9829 | 6393.9835 | -0.0006 |
| 19 | 3 | 17 | 18 | 3 | 16 | 6394.6137 | 6394.6118 | 0.0019  |
| 19 | 3 | 16 | 18 | 3 | 15 | 6395.4892 | 6395.4885 | 0.0007  |



|    |   |    |    |   |    |           |           |         |
|----|---|----|----|---|----|-----------|-----------|---------|
| 19 | 2 | 17 | 18 | 2 | 16 | 6407.2973 | 6407.2964 | 0.0009  |
| 19 | 1 | 18 | 18 | 1 | 17 | 6424.3645 | 6424.3652 | -0.0007 |
| 9  | 3 | 7  | 8  | 2 | 6  | 6465.5073 | 6465.5093 | -0.0020 |
| 5  | 4 | 2  | 4  | 3 | 2  | 6497.4081 | 6497.4082 | -0.0001 |
| 5  | 4 | 1  | 4  | 3 | 1  | 6497.4081 | 6497.4079 | 0.0002  |
| 5  | 4 | 2  | 4  | 3 | 1  | 6497.4081 | 6497.4079 | 0.0002  |
| 5  | 4 | 1  | 4  | 3 | 2  | 6497.4081 | 6497.4082 | -0.0001 |
| 20 | 1 | 20 | 19 | 1 | 19 | 6685.2871 | 6685.2845 | 0.0026  |
| 20 | 0 | 20 | 19 | 0 | 19 | 6708.4752 | 6708.4764 | -0.0012 |
| 20 | 2 | 19 | 19 | 2 | 18 | 6725.3861 | 6725.3840 | 0.0021  |
| 20 | 6 | 14 | 19 | 6 | 13 | 6729.7624 | 6729.7643 | -0.0019 |
| 20 | 6 | 15 | 19 | 6 | 14 | 6729.7624 | 6729.7643 | -0.0019 |
| 20 | 5 | 15 | 19 | 5 | 14 | 6729.9989 | 6730.0021 | -0.0032 |
| 20 | 5 | 16 | 19 | 5 | 15 | 6729.9989 | 6730.0018 | -0.0029 |
| 20 | 4 | 17 | 19 | 4 | 16 | 6730.499  | 6730.4985 | 0.0005  |
| 20 | 4 | 16 | 19 | 4 | 15 | 6730.5228 | 6730.5218 | 0.0010  |
| 20 | 3 | 17 | 19 | 3 | 16 | 6732.3375 | 6732.3354 | 0.0021  |
| 20 | 1 | 19 | 19 | 1 | 18 | 6761.7128 | 6761.7112 | 0.0016  |
| 6  | 4 | 2  | 5  | 3 | 3  | 6833.9174 | 6833.9181 | -0.0007 |
| 6  | 4 | 3  | 5  | 3 | 2  | 6833.9174 | 6833.9169 | 0.0005  |
| 6  | 4 | 3  | 5  | 3 | 3  | 6833.9174 | 6833.9181 | -0.0007 |
| 6  | 4 | 2  | 5  | 3 | 2  | 6833.9174 | 6833.9169 | 0.0005  |
| 6  | 4 | 3  | 5  | 3 | 2  | 6833.9176 | 6833.9169 | 0.0007  |
| 6  | 4 | 3  | 5  | 3 | 3  | 6833.9176 | 6833.9181 | -0.0005 |
| 6  | 4 | 2  | 5  | 3 | 2  | 6833.9176 | 6833.9169 | 0.0007  |
| 6  | 4 | 2  | 5  | 3 | 3  | 6833.9176 | 6833.9181 | -0.0005 |
| 7  | 4 | 3  | 6  | 3 | 4  | 7170.4168 | 7170.4163 | 0.0005  |

**Table S17.** Rotational transition frequencies of the **PFPG+g+PFPG-g-** homodimer.

| $J'$ | $K_a'$ | $K_c'$ | $J''$ | $K_a''$ | $K_c''$ | Obs/ MHz  | Cal/ MHz   | Obs - Cal/ MHz |
|------|--------|--------|-------|---------|---------|-----------|------------|----------------|
| 5    | 0      | 5      | 4     | 0       | 4       | 1890.5178 | 1890.5179  | -0.0001        |
| 5    | 4      | 2      | 4     | 4       | 1       | 1892.2365 | 1892.2362  | 0.0003         |
| 5    | 4      | 1      | 4     | 4       | 0       | 1892.2365 | 1892.2362  | 0.0003         |
| 5    | 3      | 3      | 4     | 3       | 2       | 1892.3315 | 1892.3318  | -0.0003        |
| 5    | 3      | 2      | 4     | 3       | 1       | 1892.3434 | 1892.3419  | 0.0015         |
| 5    | 2      | 3      | 4     | 2       | 2       | 1893.4575 | 1893.4579  | -0.0004        |
| 5    | 1      | 4      | 4     | 1       | 3       | 1911.5501 | 1911.5483  | 0.0018         |
| 4    | 1      | 4      | 3     | 0       | 3       | 2078.3412 | 2078.3405  | 0.0007         |
| 11   | 2      | 10     | 11    | 1       | 11      | 2078.4078 | 2078.4121  | -0.0043        |
| 7    | 0      | 7      | 6     | 1       | 6       | 2119.3551 | 2119.3574  | -0.0023        |
| 6    | 1      | 6      | 5     | 1       | 5       | 2246.0844 | 2246.0883  | -0.0039        |
| 6    | 0      | 6      | 5     | 0       | 5       | 2267.7601 | 2267.7608  | -0.0007        |
| 6    | 2      | 5      | 5     | 2       | 4       | 2270.1257 | 2270.1275  | -0.0018        |
| 6    | 5      | 1      | 5     | 5       | 0       | 2270.6529 | 2270.6534  | -0.0005        |
| 6    | 5      | 2      | 5     | 5       | 1       | 2270.6529 | 2270.6534  | -0.0005        |
| 6    | 4      | 2      | 5     | 4       | 1       | 2270.7331 | 2270.7326  | 0.0005         |
| 6    | 4      | 3      | 5     | 4       | 2       | 2270.7331 | 2270.7326  | 0.0005         |
| 6    | 3      | 4      | 5     | 3       | 3       | 2270.8907 | 2270.8900  | 0.0007         |
| 6    | 3      | 3      | 5     | 3       | 2       | 2270.9168 | 2270.917   | -0.0002        |
| 6    | 2      | 4      | 5     | 2       | 3       | 2272.8505 | 2272.8513  | -0.0008        |
| 6    | 1      | 5      | 5     | 1       | 4       | 2293.6303 | 2293.6277  | 0.0026         |
| 17   | 2      | 16     | 17    | 1       | 17      | 2436.4199 | 2436.4216  | -0.0017        |
| 5    | 1      | 5      | 4     | 0       | 4       | 2437.3762 | 2437.3745  | 0.0017         |
| 8    | 0      | 8      | 7     | 1       | 7       | 2520.0031 | 2520.0060  | -0.0029        |
| 7    | 1      | 7      | 6     | 1       | 6       | 2620.1428 | 2620.1441  | -0.0013        |
| 7    | 0      | 7      | 6     | 0       | 6       | 2644.5389 | 2644.5415  | -0.0026        |
| 7    | 2      | 6      | 6     | 2       | 5       | 2648.2736 | 2648.2735  | 0.0001         |
| 7    | 6      | 2      | 6     | 6       | 1       | 2649.0619 | 2649.0627  | -0.0008        |
| 7    | 6      | 1      | 6     | 6       | 0       | 2649.0619 | 2649.0627  | -0.0008        |
| 7    | 5      | 2      | 6     | 5       | 1       | 2649.1354 | 2649.1339  | 0.0015         |
| 7    | 5      | 3      | 6     | 5       | 2       | 2649.1354 | 2649.1339  | 0.0015         |
| 7    | 4      | 3      | 6     | 4       | 2       | 2649.2586 | 2649.25600 | 0.0026         |
| 7    | 4      | 4      | 6     | 4       | 3       | 2649.2586 | 2649.2557  | 0.0029         |
| 7    | 3      | 5      | 6     | 3       | 4       | 2649.4925 | 2649.4941  | -0.0016        |
| 7    | 3      | 4      | 6     | 3       | 3       | 2649.5573 | 2649.5547  | 0.0026         |
| 7    | 2      | 5      | 6     | 2       | 4       | 2652.6197 | 2652.6201  | -0.0004        |
| 7    | 1      | 6      | 6     | 1       | 5       | 2675.5756 | 2675.5770  | -0.0014        |
| 6    | 1      | 6      | 5     | 0       | 5       | 2792.9486 | 2792.9449  | 0.0037         |

|    |   |    |    |   |    |           |           |         |
|----|---|----|----|---|----|-----------|-----------|---------|
| 9  | 0 | 9  | 8  | 1 | 8  | 2922.3877 | 2922.3896 | -0.0019 |
| 14 | 3 | 11 | 14 | 2 | 12 | 2929.5863 | 2929.5900 | -0.0037 |
| 13 | 3 | 10 | 13 | 2 | 11 | 2950.8703 | 2950.8722 | -0.0019 |
| 12 | 3 | 9  | 12 | 2 | 10 | 2968.5528 | 2968.5553 | -0.0025 |
| 11 | 3 | 8  | 11 | 2 | 9  | 2982.8936 | 2982.8937 | -0.0001 |
| 8  | 1 | 8  | 7  | 1 | 7  | 2994.0697 | 2994.0716 | -0.0019 |
| 10 | 3 | 7  | 10 | 2 | 8  | 2994.2135 | 2994.2119 | 0.0016  |
| 9  | 3 | 6  | 9  | 2 | 7  | 3002.8836 | 3002.8797 | 0.0039  |
| 8  | 3 | 5  | 8  | 2 | 6  | 3009.2908 | 3009.2901 | 0.0007  |
| 7  | 3 | 4  | 7  | 2 | 5  | 3013.8369 | 3013.8381 | -0.0012 |
| 6  | 3 | 3  | 6  | 2 | 4  | 3016.9041 | 3016.9035 | 0.0006  |
| 5  | 3 | 2  | 5  | 2 | 3  | 3018.8409 | 3018.8378 | 0.0031  |
| 4  | 3 | 1  | 4  | 2 | 2  | 3019.9561 | 3019.9539 | 0.0022  |
| 3  | 3 | 0  | 3  | 2 | 1  | 3020.5179 | 3020.5190 | -0.0011 |
| 8  | 0 | 8  | 7  | 0 | 7  | 3020.7911 | 3020.7927 | -0.0016 |
| 4  | 3 | 2  | 4  | 2 | 3  | 3021.1211 | 3021.1210 | 0.0001  |
| 5  | 3 | 3  | 5  | 2 | 4  | 3021.5548 | 3021.5538 | 0.0010  |
| 6  | 3 | 4  | 6  | 2 | 5  | 3022.3148 | 3022.3164 | -0.0016 |
| 7  | 3 | 5  | 7  | 2 | 6  | 3023.5394 | 3023.5370 | 0.0024  |
| 8  | 3 | 6  | 8  | 2 | 7  | 3025.3613 | 3025.3618 | -0.0005 |
| 8  | 2 | 7  | 7  | 2 | 6  | 3026.3217 | 3026.3234 | -0.0017 |
| 8  | 5 | 4  | 7  | 5 | 3  | 3027.6302 | 3027.6320 | -0.0018 |
| 8  | 5 | 3  | 7  | 5 | 2  | 3027.6302 | 3027.6320 | -0.0018 |
| 8  | 4 | 5  | 7  | 4 | 4  | 3027.8095 | 3027.8100 | -0.0005 |
| 8  | 4 | 4  | 7  | 4 | 3  | 3027.8095 | 3027.8108 | -0.0013 |
| 9  | 3 | 7  | 9  | 2 | 8  | 3027.9525 | 3027.9530 | -0.0005 |
| 8  | 3 | 6  | 7  | 3 | 5  | 3028.1475 | 3028.1482 | -0.0007 |
| 8  | 3 | 5  | 7  | 3 | 4  | 3028.2715 | 3028.2692 | 0.0023  |
| 10 | 3 | 8  | 10 | 2 | 9  | 3031.4852 | 3031.4874 | -0.0022 |
| 11 | 3 | 9  | 11 | 2 | 10 | 3036.1538 | 3036.1540 | -0.0002 |
| 12 | 3 | 10 | 12 | 2 | 11 | 3042.1522 | 3042.1523 | -0.0001 |
| 13 | 3 | 11 | 13 | 2 | 12 | 3049.6886 | 3049.6897 | -0.0011 |
| 8  | 1 | 7  | 7  | 1 | 6  | 3057.3735 | 3057.3709 | 0.0026  |
| 15 | 3 | 13 | 15 | 2 | 14 | 3070.2346 | 3070.2382 | -0.0036 |
| 16 | 3 | 14 | 16 | 2 | 15 | 3083.6859 | 3083.6835 | 0.0024  |
| 17 | 3 | 15 | 17 | 2 | 16 | 3099.5312 | 3099.5318 | -0.0006 |
| 18 | 3 | 16 | 18 | 2 | 17 | 3117.9951 | 3117.9955 | -0.0004 |
| 19 | 3 | 17 | 19 | 2 | 18 | 3139.2816 | 3139.2816 | 0.0000  |
| 7  | 1 | 7  | 6  | 0 | 6  | 3145.3276 | 3145.3282 | -0.0006 |
| 10 | 0 | 10 | 9  | 1 | 9  | 3326.0163 | 3326.0142 | 0.0021  |

|    |   |    |    |   |    |           |           |         |
|----|---|----|----|---|----|-----------|-----------|---------|
| 9  | 1 | 9  | 8  | 1 | 8  | 3367.8551 | 3367.8571 | -0.0020 |
| 9  | 0 | 9  | 8  | 0 | 8  | 3396.4566 | 3396.4553 | 0.0013  |
| 9  | 2 | 8  | 8  | 2 | 7  | 3404.2627 | 3404.2635 | -0.0008 |
| 9  | 7 | 3  | 8  | 7 | 2  | 3405.9171 | 3405.9169 | 0.0002  |
| 9  | 7 | 2  | 8  | 7 | 1  | 3405.9171 | 3405.9169 | 0.0002  |
| 9  | 6 | 4  | 8  | 6 | 3  | 3406.0111 | 3406.0097 | 0.0014  |
| 9  | 6 | 3  | 8  | 6 | 2  | 3406.0111 | 3406.0097 | 0.0014  |
| 9  | 5 | 4  | 8  | 5 | 3  | 3406.1503 | 3406.1503 | 0.0000  |
| 9  | 5 | 5  | 8  | 5 | 4  | 3406.1503 | 3406.1503 | 0.0000  |
| 9  | 4 | 6  | 8  | 4 | 5  | 3406.4001 | 3406.3999 | 0.0002  |
| 9  | 4 | 5  | 8  | 4 | 4  | 3406.4001 | 3406.4018 | -0.0017 |
| 9  | 3 | 7  | 8  | 3 | 6  | 3406.8542 | 3406.8548 | -0.0006 |
| 9  | 3 | 6  | 8  | 3 | 5  | 3407.0758 | 3407.0765 | -0.0007 |
| 9  | 2 | 7  | 8  | 2 | 6  | 3413.4864 | 3413.4869 | -0.0005 |
| 9  | 1 | 8  | 8  | 1 | 7  | 3438.9856 | 3438.9823 | 0.0033  |
| 8  | 1 | 8  | 7  | 0 | 7  | 3494.8584 | 3494.8584 | 0.0000  |
| 11 | 0 | 11 | 10 | 1 | 10 | 3730.3613 | 3730.3649 | -0.0036 |
| 10 | 1 | 10 | 9  | 1 | 9  | 3741.4875 | 3741.4884 | -0.0009 |
| 10 | 0 | 10 | 9  | 0 | 9  | 3771.4777 | 3771.4817 | -0.0040 |
| 10 | 2 | 9  | 9  | 2 | 8  | 3782.0799 | 3782.0804 | -0.0005 |
| 10 | 8 | 3  | 9  | 8 | 2  | 3784.2907 | 3784.2911 | -0.0004 |
| 10 | 8 | 2  | 9  | 8 | 1  | 3784.2907 | 3784.2911 | -0.0004 |
| 10 | 7 | 4  | 9  | 7 | 3  | 3784.3801 | 3784.3805 | -0.0004 |
| 10 | 7 | 3  | 9  | 7 | 2  | 3784.3801 | 3784.3805 | -0.0004 |
| 10 | 6 | 4  | 9  | 6 | 3  | 3784.5043 | 3784.5027 | 0.0016  |
| 10 | 6 | 5  | 9  | 6 | 4  | 3784.5043 | 3784.5027 | 0.0016  |
| 10 | 5 | 5  | 9  | 5 | 4  | 3784.6898 | 3784.6913 | -0.0015 |
| 10 | 5 | 6  | 9  | 5 | 5  | 3784.6898 | 3784.6913 | -0.0015 |
| 10 | 4 | 7  | 9  | 4 | 6  | 3785.0314 | 3785.0294 | 0.0020  |
| 10 | 4 | 6  | 9  | 4 | 5  | 3785.0314 | 3785.0337 | -0.0023 |
| 10 | 3 | 8  | 9  | 3 | 7  | 3785.6159 | 3785.6148 | 0.0011  |
| 10 | 3 | 7  | 9  | 3 | 6  | 3785.9962 | 3785.9943 | 0.0019  |
| 10 | 2 | 8  | 9  | 2 | 7  | 3794.6652 | 3794.6622 | 0.0030  |
| 10 | 1 | 9  | 9  | 1 | 8  | 3820.3831 | 3820.3819 | 0.0012  |
| 9  | 1 | 9  | 8  | 0 | 8  | 3841.9186 | 3841.9228 | -0.0042 |
| 14 | 1 | 13 | 13 | 2 | 12 | 3880.0187 | 3880.0185 | 0.0002  |
| 6  | 2 | 5  | 5  | 1 | 4  | 4023.4117 | 4023.4112 | 0.0005  |
| 11 | 1 | 11 | 10 | 1 | 10 | 4114.9544 | 4114.9554 | -0.0010 |
| 12 | 0 | 12 | 11 | 1 | 11 | 4134.9232 | 4134.9219 | 0.0013  |
| 11 | 0 | 11 | 10 | 0 | 10 | 4145.8371 | 4145.8391 | -0.0020 |

|    |    |    |    |    |    |           |           |         |
|----|----|----|----|----|----|-----------|-----------|---------|
| 3  | 3  | 1  | 2  | 2  | 0  | 4156.0804 | 4156.0801 | 0.0003  |
| 3  | 3  | 0  | 2  | 2  | 1  | 4156.1603 | 4156.1587 | 0.0016  |
| 11 | 2  | 10 | 10 | 2  | 9  | 4159.7629 | 4159.7606 | 0.0023  |
| 11 | 9  | 2  | 10 | 9  | 1  | 4162.6499 | 4162.6503 | -0.0004 |
| 11 | 9  | 3  | 10 | 9  | 2  | 4162.6499 | 4162.6503 | -0.0004 |
| 11 | 8  | 4  | 10 | 8  | 3  | 4162.7388 | 4162.7397 | -0.0009 |
| 11 | 8  | 3  | 10 | 8  | 2  | 4162.7388 | 4162.7397 | -0.0009 |
| 11 | 7  | 4  | 10 | 7  | 3  | 4162.8527 | 4162.8530 | -0.0003 |
| 11 | 7  | 5  | 10 | 7  | 4  | 4162.8527 | 4162.8530 | -0.0003 |
| 11 | 6  | 5  | 10 | 6  | 4  | 4163.0115 | 4163.0107 | 0.0008  |
| 11 | 6  | 6  | 10 | 6  | 5  | 4163.0115 | 4163.0107 | 0.0008  |
| 11 | 5  | 6  | 10 | 5  | 5  | 4163.2574 | 4163.2575 | -0.0001 |
| 11 | 5  | 7  | 10 | 5  | 6  | 4163.2574 | 4163.2575 | -0.0001 |
| 11 | 4  | 8  | 10 | 4  | 7  | 4163.7021 | 4163.7029 | -0.0008 |
| 11 | 4  | 7  | 10 | 4  | 6  | 4163.7111 | 4163.7113 | -0.0002 |
| 11 | 3  | 9  | 10 | 3  | 8  | 4164.4283 | 4164.4272 | 0.0011  |
| 11 | 3  | 8  | 10 | 3  | 7  | 4165.0434 | 4165.0429 | 0.0005  |
| 11 | 2  | 9  | 10 | 2  | 8  | 4176.3618 | 4176.3610 | 0.0008  |
| 18 | 4  | 14 | 18 | 3  | 15 | 4194.3123 | 4194.3120 | 0.0003  |
| 11 | 1  | 10 | 10 | 1  | 9  | 4201.5383 | 4201.5385 | -0.0002 |
| 15 | 1  | 14 | 14 | 2  | 13 | 4311.1868 | 4311.1881 | -0.0013 |
| 12 | 1  | 12 | 11 | 1  | 11 | 4488.2483 | 4488.2498 | -0.0015 |
| 12 | 0  | 12 | 11 | 0  | 11 | 4519.5128 | 4519.5125 | 0.0003  |
| 11 | 1  | 11 | 10 | 0  | 10 | 4530.4296 | 4530.4296 | 0.0000  |
| 4  | 3  | 2  | 3  | 2  | 1  | 4534.3327 | 4534.3324 | 0.0003  |
| 4  | 3  | 1  | 3  | 2  | 2  | 4534.7255 | 4534.7260 | -0.0005 |
| 12 | 2  | 11 | 11 | 2  | 10 | 4537.2909 | 4537.2908 | 0.0001  |
| 13 | 0  | 13 | 12 | 1  | 12 | 4539.1791 | 4539.1792 | -0.0001 |
| 12 | 10 | 2  | 11 | 10 | 1  | 4540.9921 | 4540.9926 | -0.0005 |
| 12 | 10 | 3  | 11 | 10 | 2  | 4540.9921 | 4540.9926 | -0.0005 |
| 12 | 9  | 3  | 11 | 9  | 2  | 4541.0852 | 4541.0843 | 0.0009  |
| 12 | 9  | 4  | 11 | 9  | 3  | 4541.0852 | 4541.0843 | 0.0009  |
| 12 | 8  | 5  | 11 | 8  | 4  | 4541.1939 | 4541.1940 | -0.0001 |
| 12 | 8  | 4  | 11 | 8  | 3  | 4541.1939 | 4541.1940 | -0.0001 |
| 12 | 7  | 6  | 11 | 7  | 5  | 4541.3371 | 4541.3353 | 0.0018  |
| 12 | 7  | 5  | 11 | 7  | 4  | 4541.3371 | 4541.3353 | 0.0018  |
| 12 | 6  | 7  | 11 | 6  | 6  | 4541.5368 | 4541.5351 | 0.0017  |
| 12 | 6  | 6  | 11 | 6  | 5  | 4541.5368 | 4541.5351 | 0.0017  |
| 12 | 5  | 7  | 11 | 5  | 6  | 4541.8516 | 4541.8515 | 0.0001  |
| 12 | 5  | 8  | 11 | 5  | 7  | 4541.8516 | 4541.8514 | 0.0002  |

|    |    |    |    |    |    |           |           |         |
|----|----|----|----|----|----|-----------|-----------|---------|
| 12 | 4  | 9  | 11 | 4  | 8  | 4542.4223 | 4542.4242 | -0.0019 |
| 12 | 4  | 8  | 11 | 4  | 7  | 4542.4395 | 4542.4400 | -0.0005 |
| 12 | 3  | 10 | 11 | 3  | 9  | 4543.2899 | 4543.2891 | 0.0008  |
| 12 | 3  | 9  | 11 | 3  | 8  | 4544.2433 | 4544.2448 | -0.0015 |
| 12 | 2  | 10 | 11 | 2  | 9  | 4558.5833 | 4558.5832 | 0.0001  |
| 12 | 1  | 11 | 11 | 1  | 10 | 4582.4175 | 4582.4182 | -0.0007 |
| 13 | 1  | 13 | 12 | 1  | 12 | 4861.3646 | 4861.3653 | -0.0007 |
| 13 | 0  | 13 | 12 | 0  | 12 | 4892.5082 | 4892.5071 | 0.0011  |
| 5  | 3  | 3  | 4  | 2  | 2  | 4912.2823 | 4912.2823 | 0.0000  |
| 5  | 3  | 2  | 4  | 2  | 3  | 4913.4651 | 4913.4662 | -0.0011 |
| 13 | 2  | 12 | 12 | 2  | 11 | 4914.6583 | 4914.6581 | 0.0002  |
| 13 | 10 | 4  | 12 | 10 | 3  | 4919.4122 | 4919.4118 | 0.0004  |
| 13 | 10 | 3  | 12 | 10 | 2  | 4919.4122 | 4919.4118 | 0.0004  |
| 13 | 9  | 4  | 12 | 9  | 3  | 4919.5218 | 4919.5213 | 0.0005  |
| 13 | 9  | 5  | 12 | 9  | 4  | 4919.5218 | 4919.5213 | 0.0005  |
| 13 | 8  | 5  | 12 | 8  | 4  | 4919.6516 | 4919.6544 | -0.0028 |
| 13 | 8  | 6  | 12 | 8  | 5  | 4919.6516 | 4919.6544 | -0.0028 |
| 13 | 7  | 6  | 12 | 7  | 5  | 4919.8269 | 4919.8285 | -0.0016 |
| 13 | 7  | 7  | 12 | 7  | 6  | 4919.8269 | 4919.8285 | -0.0016 |
| 13 | 6  | 7  | 12 | 6  | 6  | 4920.0768 | 4920.0776 | -0.0008 |
| 13 | 6  | 8  | 12 | 6  | 7  | 4920.0768 | 4920.0776 | -0.0008 |
| 13 | 5  | 9  | 12 | 5  | 8  | 4920.4757 | 4920.4756 | 0.0001  |
| 13 | 5  | 8  | 12 | 5  | 7  | 4920.4757 | 4920.4759 | -0.0002 |
| 13 | 4  | 10 | 12 | 4  | 9  | 4921.1942 | 4921.1970 | -0.0028 |
| 13 | 4  | 9  | 12 | 4  | 8  | 4921.2258 | 4921.2251 | 0.0007  |
| 13 | 3  | 11 | 12 | 3  | 10 | 4922.1952 | 4922.1955 | -0.0003 |
| 13 | 3  | 10 | 12 | 3  | 9  | 4923.6254 | 4923.6250 | 0.0004  |
| 13 | 2  | 11 | 12 | 2  | 10 | 4941.3067 | 4941.3080 | -0.0013 |
| 14 | 0  | 14 | 13 | 1  | 13 | 4942.6639 | 4942.6630 | 0.0009  |
| 13 | 1  | 12 | 12 | 1  | 11 | 4962.9843 | 4962.9846 | -0.0003 |
| 8  | 2  | 6  | 7  | 1  | 7  | 4966.9739 | 4966.9738 | 0.0001  |
| 9  | 2  | 8  | 8  | 1  | 7  | 5075.6966 | 5075.6960 | 0.0006  |
| 17 | 1  | 16 | 16 | 2  | 15 | 5180.3792 | 5180.3797 | -0.0005 |
| 14 | 1  | 14 | 13 | 1  | 13 | 5234.2968 | 5234.2978 | -0.0010 |
| 14 | 0  | 14 | 13 | 0  | 13 | 5264.8491 | 5264.8491 | 0.0000  |
| 6  | 3  | 4  | 5  | 2  | 3  | 5289.7146 | 5289.7144 | 0.0002  |
| 14 | 2  | 13 | 13 | 2  | 12 | 5291.8502 | 5291.8497 | 0.0005  |
| 6  | 3  | 3  | 5  | 2  | 4  | 5292.4852 | 5292.4842 | 0.0010  |
| 14 | 11 | 4  | 13 | 11 | 3  | 5297.7189 | 5297.7198 | -0.0009 |
| 14 | 11 | 3  | 13 | 11 | 2  | 5297.7189 | 5297.7198 | -0.0009 |

|    |    |    |    |    |    |           |           |         |
|----|----|----|----|----|----|-----------|-----------|---------|
| 14 | 10 | 4  | 13 | 10 | 3  | 5297.8326 | 5297.8317 | 0.0009  |
| 14 | 10 | 5  | 13 | 10 | 4  | 5297.8326 | 5297.8317 | 0.0009  |
| 14 | 9  | 6  | 13 | 9  | 5  | 5297.9612 | 5297.9615 | -0.0003 |
| 14 | 9  | 5  | 13 | 9  | 4  | 5297.9612 | 5297.9615 | -0.0003 |
| 14 | 8  | 7  | 13 | 8  | 6  | 5298.1213 | 5298.1213 | 0.0000  |
| 14 | 8  | 6  | 13 | 8  | 5  | 5298.1217 | 5298.1213 | 0.0004  |
| 14 | 7  | 8  | 13 | 7  | 7  | 5298.3358 | 5298.3332 | 0.0026  |
| 14 | 7  | 7  | 13 | 7  | 6  | 5298.3358 | 5298.3332 | 0.0026  |
| 14 | 6  | 9  | 13 | 6  | 8  | 5298.6406 | 5298.6396 | 0.0010  |
| 14 | 6  | 8  | 13 | 6  | 7  | 5298.6406 | 5298.6396 | 0.0010  |
| 14 | 5  | 10 | 13 | 5  | 9  | 5299.1329 | 5299.1326 | 0.0003  |
| 14 | 5  | 9  | 13 | 5  | 8  | 5299.1329 | 5299.1332 | -0.0003 |
| 14 | 3  | 12 | 13 | 3  | 11 | 5301.1396 | 5301.1395 | 0.0001  |
| 14 | 3  | 11 | 13 | 3  | 10 | 5303.2111 | 5303.2113 | -0.0002 |
| 14 | 2  | 12 | 13 | 2  | 11 | 5324.4948 | 5324.4935 | 0.0013  |
| 14 | 1  | 13 | 13 | 1  | 12 | 5343.2002 | 5343.1989 | 0.0013  |
| 15 | 0  | 15 | 14 | 1  | 14 | 5344.9507 | 5344.9497 | 0.0010  |
| 10 | 2  | 9  | 9  | 1  | 8  | 5418.7947 | 5418.7941 | 0.0006  |
| 15 | 1  | 15 | 14 | 1  | 14 | 5607.0427 | 5607.0449 | -0.0022 |
| 18 | 1  | 17 | 17 | 2  | 16 | 5617.7958 | 5617.7977 | -0.0019 |
| 15 | 0  | 15 | 14 | 0  | 14 | 5636.5851 | 5636.5844 | 0.0007  |
| 7  | 3  | 5  | 6  | 2  | 4  | 5666.3574 | 5666.3572 | 0.0002  |
| 15 | 2  | 14 | 14 | 2  | 13 | 5668.8542 | 5668.8533 | 0.0009  |
| 7  | 3  | 4  | 6  | 2  | 5  | 5671.9118 | 5671.9115 | 0.0003  |
| 15 | 11 | 4  | 14 | 11 | 3  | 5676.1212 | 5676.1226 | -0.0014 |
| 15 | 11 | 5  | 14 | 11 | 4  | 5676.1212 | 5676.1226 | -0.0014 |
| 15 | 10 | 5  | 14 | 10 | 4  | 5676.2537 | 5676.2524 | 0.0013  |
| 15 | 10 | 6  | 14 | 10 | 5  | 5676.2537 | 5676.2524 | 0.0013  |
| 15 | 9  | 7  | 14 | 9  | 6  | 5676.4055 | 5676.4050 | 0.0005  |
| 15 | 9  | 6  | 14 | 9  | 5  | 5676.4055 | 5676.4050 | 0.0005  |
| 15 | 8  | 8  | 14 | 8  | 7  | 5676.5964 | 5676.5954 | 0.0010  |
| 15 | 8  | 7  | 14 | 8  | 6  | 5676.5964 | 5676.5954 | 0.0010  |
| 15 | 7  | 9  | 14 | 7  | 8  | 5676.8518 | 5676.8505 | 0.0013  |
| 15 | 7  | 8  | 14 | 7  | 7  | 5676.8518 | 5676.8505 | 0.0013  |
| 15 | 6  | 9  | 14 | 6  | 8  | 5677.2238 | 5677.2226 | 0.0012  |
| 15 | 6  | 10 | 14 | 6  | 9  | 5677.2238 | 5677.2226 | 0.0012  |
| 15 | 5  | 11 | 14 | 5  | 10 | 5677.8266 | 5677.8250 | 0.0016  |
| 15 | 5  | 10 | 14 | 5  | 9  | 5677.8266 | 5677.8260 | 0.0006  |
| 15 | 4  | 12 | 14 | 4  | 11 | 5678.9114 | 5678.9107 | 0.0007  |
| 15 | 4  | 11 | 14 | 4  | 10 | 5678.9889 | 5678.9886 | 0.0003  |

|    |    |    |    |    |    |           |           |         |
|----|----|----|----|----|----|-----------|-----------|---------|
| 15 | 3  | 13 | 14 | 3  | 12 | 5680.1116 | 5680.1120 | -0.0004 |
| 15 | 3  | 12 | 14 | 3  | 11 | 5683.0342 | 5683.0340 | 0.0002  |
| 15 | 2  | 13 | 14 | 2  | 12 | 5708.0765 | 5708.0774 | -0.0009 |
| 15 | 1  | 14 | 14 | 1  | 13 | 5723.0186 | 5723.0192 | -0.0006 |
| 16 | 0  | 16 | 15 | 1  | 15 | 5745.6823 | 5745.6804 | 0.0019  |
| 11 | 2  | 10 | 10 | 1  | 9  | 5758.1735 | 5758.1728 | 0.0007  |
| 16 | 1  | 16 | 15 | 1  | 15 | 5979.6066 | 5979.6065 | 0.0001  |
| 16 | 0  | 16 | 15 | 0  | 15 | 6007.7756 | 6007.7756 | 0.0000  |
| 8  | 3  | 6  | 7  | 2  | 5  | 6041.8851 | 6041.8853 | -0.0002 |
| 16 | 2  | 15 | 15 | 2  | 14 | 6045.6595 | 6045.6569 | 0.0026  |
| 8  | 3  | 5  | 7  | 2  | 6  | 6051.9077 | 6051.9072 | 0.0005  |
| 16 | 12 | 4  | 15 | 12 | 3  | 6054.3914 | 6054.3917 | -0.0003 |
| 16 | 12 | 5  | 15 | 12 | 4  | 6054.3914 | 6054.3917 | -0.0003 |
| 16 | 11 | 6  | 15 | 11 | 5  | 6054.5249 | 6054.5241 | 0.0008  |
| 16 | 11 | 5  | 15 | 11 | 4  | 6054.5249 | 6054.5241 | 0.0008  |
| 16 | 10 | 7  | 15 | 10 | 6  | 6054.6761 | 6054.6741 | 0.0020  |
| 16 | 10 | 6  | 15 | 10 | 5  | 6054.6761 | 6054.6741 | 0.0020  |
| 16 | 9  | 7  | 15 | 9  | 6  | 6054.8503 | 6054.8523 | -0.0020 |
| 16 | 9  | 8  | 15 | 9  | 7  | 6054.8503 | 6054.8523 | -0.0020 |
| 16 | 8  | 8  | 15 | 8  | 7  | 6055.0752 | 6055.0771 | -0.0019 |
| 16 | 8  | 9  | 15 | 8  | 8  | 6055.0752 | 6055.0771 | -0.0019 |
| 16 | 7  | 9  | 15 | 7  | 8  | 6055.3808 | 6055.3812 | -0.0004 |
| 16 | 7  | 10 | 15 | 7  | 9  | 6055.3808 | 6055.3812 | -0.0004 |
| 16 | 6  | 11 | 15 | 6  | 10 | 6055.8284 | 6055.8282 | 0.0002  |
| 16 | 6  | 10 | 15 | 6  | 9  | 6055.8284 | 6055.8282 | 0.0002  |
| 16 | 5  | 12 | 15 | 5  | 11 | 6056.5559 | 6056.5551 | 0.0008  |
| 16 | 5  | 11 | 15 | 5  | 10 | 6056.5559 | 6056.5571 | -0.0012 |
| 16 | 4  | 13 | 15 | 4  | 12 | 6057.8575 | 6057.8573 | 0.0002  |
| 16 | 4  | 12 | 15 | 4  | 11 | 6057.9804 | 6057.9805 | -0.0001 |
| 16 | 3  | 14 | 15 | 3  | 13 | 6059.1005 | 6059.1023 | -0.0018 |
| 16 | 3  | 13 | 15 | 3  | 12 | 6063.1254 | 6063.1257 | -0.0003 |
| 16 | 2  | 14 | 15 | 2  | 13 | 6091.9803 | 6091.9801 | 0.0002  |
| 12 | 2  | 11 | 11 | 1  | 10 | 6093.9251 | 6093.9251 | 0.0000  |
| 16 | 1  | 15 | 15 | 1  | 14 | 6102.4043 | 6102.4017 | 0.0026  |
| 17 | 0  | 17 | 16 | 1  | 16 | 6144.5714 | 6144.5716 | -0.0002 |
| 17 | 1  | 17 | 16 | 1  | 16 | 6351.9853 | 6351.9841 | 0.0012  |
| 17 | 0  | 17 | 16 | 0  | 16 | 6378.4964 | 6378.4977 | -0.0013 |
| 9  | 3  | 7  | 8  | 2  | 6  | 6415.9225 | 6415.9230 | -0.0005 |
| 17 | 2  | 16 | 16 | 2  | 15 | 6422.2503 | 6422.2492 | 0.0011  |
| 13 | 2  | 12 | 12 | 1  | 11 | 6426.1645 | 6426.1650 | -0.0005 |



|    |    |    |    |    |    |           |           |         |
|----|----|----|----|----|----|-----------|-----------|---------|
| 9  | 3  | 6  | 8  | 2  | 7  | 6432.6605 | 6432.6602 | 0.0003  |
| 17 | 11 | 6  | 16 | 11 | 5  | 6432.9254 | 6432.9244 | 0.0010  |
| 17 | 11 | 7  | 16 | 11 | 6  | 6432.9254 | 6432.9244 | 0.0010  |
| 17 | 10 | 7  | 16 | 10 | 6  | 6433.0945 | 6433.0966 | -0.0021 |
| 17 | 10 | 8  | 16 | 10 | 7  | 6433.0945 | 6433.0966 | -0.0021 |
| 17 | 9  | 8  | 16 | 9  | 7  | 6433.3052 | 6433.3035 | 0.0017  |
| 17 | 9  | 9  | 16 | 9  | 8  | 6433.3052 | 6433.3035 | 0.0017  |
| 17 | 8  | 10 | 16 | 8  | 9  | 6433.5652 | 6433.5669 | -0.0017 |
| 17 | 8  | 9  | 16 | 8  | 8  | 6433.5652 | 6433.5669 | -0.0017 |
| 17 | 7  | 11 | 16 | 7  | 10 | 6433.9266 | 6433.9263 | 0.0003  |
| 17 | 7  | 10 | 16 | 7  | 9  | 6433.9266 | 6433.9263 | 0.0003  |
| 17 | 6  | 11 | 16 | 6  | 10 | 6434.4578 | 6434.4578 | 0.0000  |
| 17 | 6  | 12 | 16 | 6  | 11 | 6434.4578 | 6434.4577 | 0.0001  |
| 17 | 5  | 13 | 16 | 5  | 12 | 6435.3255 | 6435.3257 | -0.0002 |
| 17 | 5  | 12 | 16 | 5  | 11 | 6435.3287 | 6435.3290 | -0.0003 |
| 17 | 4  | 14 | 16 | 4  | 13 | 6436.8678 | 6436.8667 | 0.0011  |
| 17 | 4  | 13 | 16 | 4  | 12 | 6437.0558 | 6437.0558 | 0.0000  |
| 17 | 3  | 15 | 16 | 3  | 14 | 6438.0972 | 6438.0975 | -0.0003 |
| 17 | 3  | 14 | 16 | 3  | 13 | 6443.5203 | 6443.5212 | -0.0009 |
| 17 | 2  | 15 | 16 | 2  | 14 | 6476.1114 | 6476.1089 | 0.0025  |
| 17 | 1  | 16 | 16 | 1  | 15 | 6481.3009 | 6481.3001 | 0.0008  |
| 18 | 0  | 18 | 17 | 1  | 17 | 6541.4205 | 6541.4196 | 0.0009  |
| 17 | 1  | 17 | 16 | 0  | 16 | 6585.9079 | 6585.9103 | -0.0024 |
| 18 | 1  | 18 | 17 | 1  | 17 | 6724.1827 | 6724.1809 | 0.0018  |
| 18 | 0  | 18 | 17 | 0  | 17 | 6748.8327 | 6748.8321 | 0.0006  |
| 14 | 2  | 13 | 13 | 1  | 12 | 6755.0291 | 6755.0301 | -0.0010 |
| 18 | 2  | 17 | 17 | 2  | 16 | 6798.6196 | 6798.6195 | 0.0001  |
| 18 | 7  | 12 | 17 | 7  | 11 | 6812.4884 | 6812.4866 | 0.0018  |
| 18 | 7  | 11 | 17 | 7  | 10 | 6812.4884 | 6812.4866 | 0.0018  |
| 18 | 6  | 12 | 17 | 6  | 11 | 6813.1108 | 6813.1130 | -0.0022 |
| 18 | 6  | 13 | 17 | 6  | 12 | 6813.1108 | 6813.1129 | -0.0021 |
| 18 | 5  | 14 | 17 | 5  | 13 | 6814.1376 | 6814.1390 | -0.0014 |
| 18 | 5  | 13 | 17 | 5  | 12 | 6814.1438 | 6814.1446 | -0.0008 |
| 18 | 4  | 15 | 17 | 4  | 14 | 6815.9400 | 6815.9404 | -0.0004 |
| 18 | 4  | 14 | 17 | 4  | 13 | 6816.2223 | 6816.2233 | -0.0010 |
| 18 | 3  | 16 | 17 | 3  | 15 | 6817.0824 | 6817.0832 | -0.0008 |
| 18 | 3  | 15 | 17 | 3  | 14 | 6824.2548 | 6824.2563 | -0.0015 |
| 18 | 1  | 17 | 17 | 1  | 16 | 6859.6707 | 6859.6673 | 0.0034  |
| 18 | 2  | 16 | 17 | 2  | 15 | 6860.3624 | 6860.3637 | -0.0013 |
| 19 | 1  | 19 | 18 | 1  | 18 | 7096.1995 | 7096.2017 | -0.0022 |

|    |   |    |    |   |    |           |           |         |
|----|---|----|----|---|----|-----------|-----------|---------|
| 19 | 0 | 19 | 18 | 0 | 18 | 7118.8596 | 7118.8610 | -0.0014 |
| 13 | 2 | 11 | 12 | 1 | 12 | 7144.7546 | 7144.7527 | 0.0019  |
| 11 | 3 | 9  | 10 | 2 | 8  | 7157.8158 | 7157.8158 | 0.0000  |
| 19 | 2 | 18 | 18 | 2 | 17 | 7174.7579 | 7174.7576 | 0.0003  |
| 19 | 6 | 13 | 18 | 6 | 12 | 7191.7986 | 7191.7953 | 0.0033  |
| 19 | 6 | 14 | 18 | 6 | 13 | 7191.7986 | 7191.7952 | 0.0034  |
| 19 | 5 | 15 | 18 | 5 | 14 | 7192.9950 | 7192.9976 | -0.0026 |
| 19 | 5 | 14 | 18 | 5 | 13 | 7193.0046 | 7193.0069 | -0.0023 |
| 19 | 3 | 16 | 18 | 3 | 15 | 7205.3662 | 7205.3671 | -0.0009 |
| 19 | 1 | 18 | 18 | 1 | 17 | 7237.4539 | 7237.4553 | -0.0014 |
| 19 | 1 | 19 | 18 | 0 | 18 | 7278.9622 | 7278.9631 | -0.0009 |
| 20 | 1 | 20 | 19 | 1 | 19 | 7468.0533 | 7468.0525 | 0.0008  |
| 20 | 0 | 20 | 19 | 0 | 19 | 7488.6635 | 7488.6624 | 0.0011  |

**Table S18.** Rotational transition frequencies of the **PFPG+g+PFPTg-** homodimer.

| $J'$ | $K_a'$ | $K_c'$ | $J''$ | $K_a''$ | $K_c''$ | Obs/ MHz  | Cal/ MHz  | Obs - Cal/ MHz |
|------|--------|--------|-------|---------|---------|-----------|-----------|----------------|
| 6    | 1      | 6      | 5     | 1       | 5       | 2078.0416 | 2078.0412 | 0.0004         |
| 6    | 0      | 6      | 5     | 0       | 5       | 2106.8438 | 2106.8487 | -0.0049        |
| 6    | 2      | 5      | 5     | 2       | 4       | 2111.2251 | 2111.2323 | -0.0072        |
| 6    | 3      | 4      | 5     | 3       | 3       | 2112.6405 | 2112.6450 | -0.0045        |
| 6    | 3      | 3      | 5     | 3       | 2       | 2112.7068 | 2112.7124 | -0.0056        |
| 6    | 2      | 4      | 5     | 2       | 3       | 2116.2631 | 2116.2727 | -0.0096        |
| 6    | 1      | 5      | 5     | 1       | 4       | 2143.4046 | 2143.4149 | -0.0103        |
| 11   | 2      | 10     | 11    | 1       | 11      | 2216.6591 | 2216.6524 | 0.0067         |
| 5    | 1      | 5      | 4     | 0       | 4       | 2295.6553 | 2295.6597 | -0.0044        |
| 7    | 1      | 7      | 6     | 1       | 6       | 2423.8601 | 2423.8576 | 0.0025         |
| 7    | 0      | 7      | 6     | 0       | 6       | 2455.8326 | 2455.8328 | -0.0002        |
| 7    | 2      | 6      | 6     | 2       | 5       | 2462.7261 | 2462.7259 | 0.0002         |
| 7    | 3      | 5      | 6     | 3       | 4       | 2464.9905 | 2464.9787 | 0.0118         |
| 7    | 3      | 4      | 6     | 3       | 3       | 2465.1392 | 2465.1301 | 0.0091         |
| 7    | 2      | 5      | 6     | 2       | 4       | 2470.7578 | 2470.7519 | 0.0059         |
| 7    | 1      | 6      | 6     | 1       | 5       | 2500.0613 | 2500.0513 | 0.0100         |
| 6    | 1      | 6      | 5     | 0       | 5       | 2616.6717 | 2616.6751 | -0.0034        |
| 8    | 1      | 8      | 7     | 1       | 7       | 2769.4501 | 2769.4485 | 0.0016         |
| 8    | 0      | 8      | 7     | 0       | 7       | 2803.8747 | 2803.8702 | 0.0045         |
| 8    | 2      | 7      | 7     | 2       | 6       | 2814.0500 | 2814.0452 | 0.0048         |

|    |   |    |    |   |    |           |           |         |
|----|---|----|----|---|----|-----------|-----------|---------|
| 8  | 3 | 6  | 7  | 3 | 5  | 2817.4054 | 2817.4006 | 0.0048  |
| 8  | 3 | 5  | 7  | 3 | 4  | 2817.7092 | 2817.7030 | 0.0062  |
| 8  | 2 | 6  | 7  | 2 | 5  | 2826.0043 | 2825.9973 | 0.0070  |
| 8  | 1 | 7  | 7  | 1 | 6  | 2856.3896 | 2856.3940 | -0.0044 |
| 9  | 1 | 9  | 8  | 1 | 8  | 3114.7879 | 3114.7929 | -0.0050 |
| 9  | 0 | 9  | 8  | 0 | 8  | 3150.8764 | 3150.8788 | -0.0024 |
| 9  | 2 | 8  | 8  | 2 | 7  | 3165.1749 | 3165.1658 | 0.0091  |
| 9  | 5 | 4  | 8  | 5 | 3  | 3168.7001 | 3168.7064 | -0.0063 |
| 9  | 5 | 5  | 8  | 5 | 4  | 3168.7065 | 3168.7064 | 0.0001  |
| 9  | 3 | 7  | 8  | 3 | 6  | 3169.9139 | 3169.9122 | 0.0017  |
| 9  | 3 | 6  | 8  | 3 | 5  | 3170.4667 | 3170.4657 | 0.0010  |
| 9  | 2 | 7  | 8  | 2 | 6  | 3182.0628 | 3182.0649 | -0.0021 |
| 9  | 1 | 8  | 8  | 1 | 7  | 3212.3890 | 3212.3886 | 0.0004  |
| 4  | 2 | 3  | 3  | 1 | 2  | 3224.2138 | 3224.2211 | -0.0073 |
| 8  | 1 | 8  | 7  | 0 | 7  | 3247.2969 | 3247.2998 | -0.0029 |
| 18 | 3 | 16 | 18 | 2 | 17 | 3254.1338 | 3254.1332 | 0.0006  |
| 17 | 3 | 14 | 17 | 2 | 16 | 3266.8303 | 3266.8314 | -0.0011 |
| 4  | 2 | 3  | 3  | 1 | 3  | 3289.6618 | 3289.6664 | -0.0046 |
| 4  | 2 | 2  | 3  | 1 | 3  | 3291.8323 | 3291.8373 | -0.0050 |
| 14 | 1 | 13 | 13 | 2 | 11 | 3424.2687 | 3424.2714 | -0.0027 |
| 20 | 3 | 17 | 20 | 2 | 19 | 3445.5515 | 3445.5509 | 0.0006  |
| 10 | 1 | 10 | 9  | 1 | 9  | 3459.8742 | 3459.8737 | 0.0005  |
| 10 | 0 | 10 | 9  | 0 | 9  | 3496.8001 | 3496.8103 | -0.0102 |
| 10 | 2 | 9  | 9  | 2 | 8  | 3516.0665 | 3516.0635 | 0.0030  |
| 10 | 3 | 8  | 9  | 3 | 7  | 3522.5166 | 3522.5108 | 0.0058  |
| 10 | 3 | 7  | 9  | 3 | 6  | 3523.4656 | 3523.4574 | 0.0082  |
| 10 | 2 | 8  | 9  | 2 | 7  | 3538.9756 | 3538.9762 | -0.0006 |
| 5  | 2 | 4  | 4  | 1 | 3  | 3554.3613 | 3554.3534 | 0.0079  |
| 5  | 2 | 3  | 4  | 1 | 3  | 3559.4101 | 3559.4130 | -0.0029 |
| 10 | 1 | 9  | 9  | 1 | 8  | 3567.9723 | 3567.9759 | -0.0036 |
| 5  | 2 | 4  | 4  | 1 | 4  | 3663.4155 | 3663.4213 | -0.0058 |
| 5  | 2 | 3  | 4  | 1 | 4  | 3668.4752 | 3668.4809 | -0.0057 |
| 11 | 1 | 11 | 10 | 1 | 10 | 3804.6754 | 3804.6782 | -0.0028 |
| 11 | 0 | 11 | 10 | 0 | 10 | 3841.6534 | 3841.6572 | -0.0038 |
| 11 | 2 | 10 | 10 | 2 | 9  | 3866.7253 | 3866.7144 | 0.0109  |
| 10 | 1 | 10 | 9  | 0 | 9  | 3867.2088 | 3867.2173 | -0.0085 |
| 11 | 3 | 9  | 10 | 3 | 8  | 3875.1927 | 3875.1896 | 0.0031  |
| 11 | 3 | 8  | 10 | 3 | 7  | 3876.7241 | 3876.7231 | 0.0010  |
| 6  | 2 | 5  | 5  | 1 | 4  | 3879.0626 | 3879.0511 | 0.0115  |
| 11 | 2 | 9  | 10 | 2 | 8  | 3896.7065 | 3896.7114 | -0.0049 |

|    |   |    |    |   |    |           |           |         |
|----|---|----|----|---|----|-----------|-----------|---------|
| 11 | 1 | 10 | 10 | 1 | 9  | 3923.0801 | 3923.0913 | -0.0112 |
| 12 | 1 | 12 | 11 | 1 | 11 | 4149.1904 | 4149.1982 | -0.0078 |
| 11 | 1 | 11 | 10 | 0 | 10 | 4175.0882 | 4175.0852 | 0.0030  |
| 12 | 0 | 12 | 11 | 0 | 11 | 4185.4546 | 4185.4569 | -0.0023 |
| 12 | 2 | 11 | 11 | 2 | 10 | 4217.0984 | 4217.0955 | 0.0029  |
| 12 | 3 | 10 | 11 | 3 | 9  | 4227.9489 | 4227.9373 | 0.0116  |
| 12 | 3 | 9  | 11 | 3 | 8  | 4230.3227 | 4230.3129 | 0.0098  |
| 12 | 2 | 10 | 11 | 2 | 9  | 4255.2008 | 4255.2052 | -0.0044 |
| 12 | 1 | 11 | 11 | 1 | 10 | 4277.6643 | 4277.6647 | -0.0004 |
| 7  | 2 | 6  | 6  | 1 | 6  | 4427.3174 | 4427.3143 | 0.0031  |
| 7  | 2 | 5  | 6  | 1 | 6  | 4445.4369 | 4445.4404 | -0.0035 |
| 12 | 1 | 12 | 11 | 0 | 11 | 4482.6303 | 4482.6262 | 0.0041  |
| 13 | 1 | 13 | 12 | 1 | 12 | 4493.4246 | 4493.4296 | -0.0050 |
| 13 | 0 | 13 | 12 | 0 | 12 | 4528.2825 | 4528.2898 | -0.0073 |
| 13 | 2 | 12 | 12 | 2 | 11 | 4567.1868 | 4567.1843 | 0.0025  |
| 13 | 3 | 11 | 12 | 3 | 10 | 4580.7409 | 4580.7384 | 0.0025  |
| 13 | 3 | 10 | 12 | 3 | 9  | 4584.2883 | 4584.2829 | 0.0054  |
| 13 | 2 | 11 | 12 | 2 | 10 | 4614.3418 | 4614.3484 | -0.0066 |
| 13 | 1 | 12 | 12 | 1 | 11 | 4631.6214 | 4631.6202 | 0.0012  |
| 13 | 1 | 13 | 12 | 0 | 12 | 4790.6004 | 4790.5989 | 0.0015  |
| 8  | 2 | 7  | 7  | 1 | 7  | 4817.5038 | 4817.5019 | 0.0019  |
| 14 | 1 | 14 | 13 | 1 | 13 | 4837.3673 | 4837.3727 | -0.0054 |
| 8  | 2 | 6  | 7  | 1 | 7  | 4847.5759 | 4847.5801 | -0.0042 |
| 14 | 0 | 14 | 13 | 0 | 13 | 4870.2738 | 4870.2729 | 0.0009  |
| 14 | 2 | 13 | 13 | 2 | 12 | 4916.9612 | 4916.9594 | 0.0018  |
| 14 | 7 | 8  | 13 | 7 | 7  | 4929.0915 | 4929.0917 | -0.0002 |
| 14 | 7 | 7  | 13 | 7 | 6  | 4929.0915 | 4929.0917 | -0.0002 |
| 14 | 3 | 12 | 13 | 3 | 11 | 4933.5745 | 4933.5732 | 0.0013  |
| 14 | 3 | 11 | 13 | 3 | 10 | 4938.6952 | 4938.6940 | 0.0012  |
| 14 | 2 | 12 | 13 | 2 | 11 | 4973.9917 | 4973.9934 | -0.0017 |
| 14 | 1 | 13 | 13 | 1 | 12 | 4984.8729 | 4984.8769 | -0.0040 |
| 14 | 1 | 14 | 13 | 0 | 13 | 5099.6831 | 5099.6817 | 0.0014  |
| 15 | 1 | 15 | 14 | 1 | 14 | 5181.0278 | 5181.0315 | -0.0037 |
| 9  | 2 | 8  | 8  | 1 | 8  | 5213.2255 | 5213.2192 | 0.0063  |
| 9  | 2 | 7  | 8  | 1 | 8  | 5260.1966 | 5260.1965 | 0.0001  |
| 15 | 2 | 14 | 14 | 2 | 13 | 5266.3924 | 5266.4004 | -0.0080 |
| 15 | 3 | 13 | 14 | 3 | 12 | 5286.4192 | 5286.4179 | 0.0013  |
| 15 | 3 | 12 | 14 | 3 | 11 | 5293.6238 | 5293.6114 | 0.0124  |
| 15 | 1 | 14 | 14 | 1 | 13 | 5337.3434 | 5337.3495 | -0.0061 |
| 15 | 1 | 15 | 14 | 0 | 14 | 5410.4503 | 5410.4403 | 0.0100  |

|    |   |    |    |   |    |           |           |         |
|----|---|----|----|---|----|-----------|-----------|---------|
| 16 | 1 | 16 | 15 | 1 | 15 | 5524.4023 | 5524.4137 | -0.0114 |
| 16 | 0 | 16 | 15 | 0 | 15 | 5552.2682 | 5552.2684 | -0.0002 |
| 16 | 2 | 15 | 15 | 2 | 14 | 5615.4871 | 5615.4885 | -0.0014 |
| 16 | 6 | 11 | 15 | 6 | 10 | 5634.3852 | 5634.3829 | 0.0023  |
| 16 | 6 | 10 | 15 | 6 | 9  | 5634.3852 | 5634.3830 | 0.0022  |
| 16 | 3 | 14 | 15 | 3 | 13 | 5639.2451 | 5639.2456 | -0.0005 |
| 16 | 3 | 13 | 15 | 3 | 12 | 5649.1019 | 5649.1021 | -0.0002 |
| 10 | 2 | 8  | 9  | 1 | 9  | 5684.3788 | 5684.3798 | -0.0010 |
| 16 | 1 | 15 | 15 | 1 | 14 | 5688.9479 | 5688.9508 | -0.0029 |
| 17 | 0 | 17 | 16 | 0 | 16 | 5892.5752 | 5892.5838 | -0.0086 |
| 17 | 2 | 16 | 16 | 2 | 15 | 5964.2032 | 5964.2065 | -0.0033 |
| 17 | 4 | 14 | 16 | 4 | 13 | 5991.1179 | 5991.1135 | 0.0044  |
| 17 | 4 | 13 | 16 | 4 | 12 | 5991.7468 | 5991.7460 | 0.0008  |
| 17 | 3 | 15 | 16 | 3 | 14 | 5992.0254 | 5992.0261 | -0.0007 |
| 17 | 3 | 14 | 16 | 3 | 13 | 6005.2272 | 6005.2326 | -0.0054 |
| 18 | 4 | 15 | 17 | 4 | 14 | 6344.3496 | 6344.3430 | 0.0066  |
| 18 | 3 | 16 | 17 | 3 | 15 | 6344.7349 | 6344.7270 | 0.0079  |
| 18 | 4 | 14 | 17 | 4 | 13 | 6345.2928 | 6345.2874 | 0.0054  |
| 18 | 1 | 18 | 17 | 0 | 17 | 6356.3859 | 6356.3776 | 0.0083  |
| 19 | 9 | 10 | 18 | 9 | 9  | 6689.1961 | 6689.2021 | -0.0060 |
| 19 | 9 | 11 | 18 | 9 | 10 | 6689.1961 | 6689.2021 | -0.0060 |
| 19 | 8 | 12 | 18 | 8 | 11 | 6689.7857 | 6689.7875 | -0.0018 |
| 19 | 8 | 11 | 18 | 8 | 10 | 6689.7857 | 6689.7875 | -0.0018 |
| 19 | 6 | 13 | 18 | 6 | 12 | 6691.9395 | 6691.9370 | 0.0025  |
| 19 | 6 | 14 | 18 | 6 | 13 | 6691.9395 | 6691.9363 | 0.0032  |
| 19 | 3 | 17 | 18 | 3 | 16 | 6697.3056 | 6697.3141 | -0.0085 |
| 19 | 4 | 16 | 18 | 4 | 15 | 6697.6859 | 6697.6806 | 0.0053  |
| 19 | 4 | 15 | 18 | 4 | 14 | 6699.062  | 6699.0584 | 0.0036  |
| 6  | 1 | 6  | 5  | 1 | 5  | 2078.0416 | 2078.0412 | 0.0004  |
| 6  | 0 | 6  | 5  | 0 | 5  | 2106.8438 | 2106.8487 | -0.0049 |
| 6  | 2 | 5  | 5  | 2 | 4  | 2111.2251 | 2111.2323 | -0.0072 |
| 6  | 3 | 4  | 5  | 3 | 3  | 2112.6405 | 2112.6450 | -0.0045 |
| 6  | 3 | 3  | 5  | 3 | 2  | 2112.7068 | 2112.7124 | -0.0056 |
| 6  | 2 | 4  | 5  | 2 | 3  | 2116.2631 | 2116.2727 | -0.0096 |
| 6  | 1 | 5  | 5  | 1 | 4  | 2143.4046 | 2143.4149 | -0.0103 |
| 11 | 2 | 10 | 11 | 1 | 11 | 2216.6591 | 2216.6524 | 0.0067  |
| 5  | 1 | 5  | 4  | 0 | 4  | 2295.6553 | 2295.6597 | -0.0044 |
| 7  | 1 | 7  | 6  | 1 | 6  | 2423.8601 | 2423.8576 | 0.0025  |
| 7  | 0 | 7  | 6  | 0 | 6  | 2455.8326 | 2455.8328 | -0.0002 |
| 7  | 2 | 6  | 6  | 2 | 5  | 2462.7261 | 2462.7259 | 0.0002  |

|    |   |    |    |   |    |           |           |         |
|----|---|----|----|---|----|-----------|-----------|---------|
| 7  | 3 | 5  | 6  | 3 | 4  | 2464.9905 | 2464.9787 | 0.0118  |
| 7  | 3 | 4  | 6  | 3 | 3  | 2465.1392 | 2465.1301 | 0.0091  |
| 7  | 2 | 5  | 6  | 2 | 4  | 2470.7578 | 2470.7519 | 0.0059  |
| 7  | 1 | 6  | 6  | 1 | 5  | 2500.0613 | 2500.0513 | 0.0100  |
| 6  | 1 | 6  | 5  | 0 | 5  | 2616.6717 | 2616.6751 | -0.0034 |
| 8  | 1 | 8  | 7  | 1 | 7  | 2769.4501 | 2769.4485 | 0.0016  |
| 8  | 0 | 8  | 7  | 0 | 7  | 2803.8747 | 2803.8702 | 0.0045  |
| 8  | 2 | 7  | 7  | 2 | 6  | 2814.0500 | 2814.0452 | 0.0048  |
| 8  | 3 | 6  | 7  | 3 | 5  | 2817.4054 | 2817.4006 | 0.0048  |
| 8  | 3 | 5  | 7  | 3 | 4  | 2817.7092 | 2817.7030 | 0.0062  |
| 8  | 2 | 6  | 7  | 2 | 5  | 2826.0043 | 2825.9973 | 0.0070  |
| 8  | 1 | 7  | 7  | 1 | 6  | 2856.3896 | 2856.3940 | -0.0044 |
| 9  | 1 | 9  | 8  | 1 | 8  | 3114.7879 | 3114.7929 | -0.005  |
| 9  | 0 | 9  | 8  | 0 | 8  | 3150.8764 | 3150.8788 | -0.0024 |
| 9  | 2 | 8  | 8  | 2 | 7  | 3165.1749 | 3165.1658 | 0.0091  |
| 9  | 5 | 4  | 8  | 5 | 3  | 3168.7001 | 3168.7064 | -0.0063 |
| 9  | 5 | 5  | 8  | 5 | 4  | 3168.7065 | 3168.7064 | 0.0001  |
| 9  | 3 | 7  | 8  | 3 | 6  | 3169.9139 | 3169.9122 | 0.0017  |
| 9  | 3 | 6  | 8  | 3 | 5  | 3170.4667 | 3170.4657 | 0.0010  |
| 9  | 2 | 7  | 8  | 2 | 6  | 3182.0628 | 3182.0649 | -0.0021 |
| 9  | 1 | 8  | 8  | 1 | 7  | 3212.3890 | 3212.3886 | 0.0004  |
| 4  | 2 | 3  | 3  | 1 | 2  | 3224.2138 | 3224.2211 | -0.0073 |
| 8  | 1 | 8  | 7  | 0 | 7  | 3247.2969 | 3247.2998 | -0.0029 |
| 18 | 3 | 16 | 18 | 2 | 17 | 3254.1338 | 3254.1332 | 0.0006  |
| 17 | 3 | 14 | 17 | 2 | 16 | 3266.8303 | 3266.8314 | -0.0011 |
| 4  | 2 | 3  | 3  | 1 | 3  | 3289.6618 | 3289.6664 | -0.0046 |
| 4  | 2 | 2  | 3  | 1 | 3  | 3291.8323 | 3291.8373 | -0.0050 |
| 14 | 1 | 13 | 13 | 2 | 11 | 3424.2687 | 3424.2714 | -0.0027 |
| 20 | 3 | 17 | 20 | 2 | 19 | 3445.5515 | 3445.5509 | 0.0006  |
| 10 | 1 | 10 | 9  | 1 | 9  | 3459.8742 | 3459.8737 | 0.0005  |
| 10 | 0 | 10 | 9  | 0 | 9  | 3496.8001 | 3496.8103 | -0.0102 |
| 10 | 2 | 9  | 9  | 2 | 8  | 3516.0665 | 3516.0635 | 0.0030  |
| 10 | 3 | 8  | 9  | 3 | 7  | 3522.5166 | 3522.5108 | 0.0058  |
| 10 | 3 | 7  | 9  | 3 | 6  | 3523.4656 | 3523.4574 | 0.0082  |
| 10 | 2 | 8  | 9  | 2 | 7  | 3538.9756 | 3538.9762 | -0.0006 |
| 5  | 2 | 4  | 4  | 1 | 3  | 3554.3613 | 3554.3534 | 0.0079  |
| 5  | 2 | 3  | 4  | 1 | 3  | 3559.4101 | 3559.4130 | -0.0029 |
| 10 | 1 | 9  | 9  | 1 | 8  | 3567.9723 | 3567.9759 | -0.0036 |
| 5  | 2 | 4  | 4  | 1 | 4  | 3663.4155 | 3663.4213 | -0.0058 |
| 5  | 2 | 3  | 4  | 1 | 4  | 3668.4752 | 3668.4809 | -0.0057 |

|    |   |    |    |   |    |           |           |         |
|----|---|----|----|---|----|-----------|-----------|---------|
| 11 | 1 | 11 | 10 | 1 | 10 | 3804.6754 | 3804.6782 | -0.0028 |
| 11 | 0 | 11 | 10 | 0 | 10 | 3841.6534 | 3841.6572 | -0.0038 |
| 11 | 2 | 10 | 10 | 2 | 9  | 3866.7253 | 3866.7144 | 0.0109  |
| 10 | 1 | 10 | 9  | 0 | 9  | 3867.2088 | 3867.2173 | -0.0085 |
| 11 | 3 | 9  | 10 | 3 | 8  | 3875.1927 | 3875.1896 | 0.0031  |
| 11 | 3 | 8  | 10 | 3 | 7  | 3876.7241 | 3876.7231 | 0.0010  |
| 6  | 2 | 5  | 5  | 1 | 4  | 3879.0626 | 3879.0511 | 0.0115  |
| 11 | 2 | 9  | 10 | 2 | 8  | 3896.7065 | 3896.7114 | -0.0049 |
| 11 | 1 | 10 | 10 | 1 | 9  | 3923.0801 | 3923.0913 | -0.0112 |
| 12 | 1 | 12 | 11 | 1 | 11 | 4149.1904 | 4149.1982 | -0.0078 |
| 11 | 1 | 11 | 10 | 0 | 10 | 4175.0882 | 4175.0852 | 0.0030  |
| 12 | 0 | 12 | 11 | 0 | 11 | 4185.4546 | 4185.4569 | -0.0023 |
| 12 | 2 | 11 | 11 | 2 | 10 | 4217.0984 | 4217.0955 | 0.0029  |
| 12 | 3 | 10 | 11 | 3 | 9  | 4227.9489 | 4227.9373 | 0.0116  |
| 12 | 3 | 9  | 11 | 3 | 8  | 4230.3227 | 4230.3129 | 0.0098  |
| 12 | 2 | 10 | 11 | 2 | 9  | 4255.2008 | 4255.2052 | -0.0044 |
| 12 | 1 | 11 | 11 | 1 | 10 | 4277.6643 | 4277.6647 | -0.0004 |
| 7  | 2 | 6  | 6  | 1 | 6  | 4427.3174 | 4427.3143 | 0.0031  |
| 7  | 2 | 5  | 6  | 1 | 6  | 4445.4369 | 4445.4404 | -0.0035 |
| 12 | 1 | 12 | 11 | 0 | 11 | 4482.6303 | 4482.6262 | 0.0041  |
| 13 | 1 | 13 | 12 | 1 | 12 | 4493.4246 | 4493.4296 | -0.0050 |
| 13 | 0 | 13 | 12 | 0 | 12 | 4528.2825 | 4528.2898 | -0.0073 |
| 13 | 2 | 12 | 12 | 2 | 11 | 4567.1868 | 4567.1843 | 0.0025  |
| 13 | 3 | 11 | 12 | 3 | 10 | 4580.7409 | 4580.7384 | 0.0025  |
| 13 | 3 | 10 | 12 | 3 | 9  | 4584.2883 | 4584.2829 | 0.0054  |
| 13 | 2 | 11 | 12 | 2 | 10 | 4614.3418 | 4614.3484 | -0.0066 |
| 13 | 1 | 12 | 12 | 1 | 11 | 4631.6214 | 4631.6202 | 0.0012  |
| 13 | 1 | 13 | 12 | 0 | 12 | 4790.6004 | 4790.5989 | 0.0015  |
| 8  | 2 | 7  | 7  | 1 | 7  | 4817.5038 | 4817.5019 | 0.0019  |
| 14 | 1 | 14 | 13 | 1 | 13 | 4837.3673 | 4837.3727 | -0.0054 |
| 8  | 2 | 6  | 7  | 1 | 7  | 4847.5759 | 4847.5801 | -0.0042 |
| 14 | 0 | 14 | 13 | 0 | 13 | 4870.2738 | 4870.2729 | 0.0009  |
| 14 | 2 | 13 | 13 | 2 | 12 | 4916.9612 | 4916.9594 | 0.0018  |
| 14 | 7 | 8  | 13 | 7 | 7  | 4929.0915 | 4929.0917 | -0.0002 |
| 14 | 7 | 7  | 13 | 7 | 6  | 4929.0915 | 4929.0917 | -0.0002 |
| 14 | 3 | 12 | 13 | 3 | 11 | 4933.5745 | 4933.5732 | 0.0013  |
| 14 | 3 | 11 | 13 | 3 | 10 | 4938.6952 | 4938.6940 | 0.0012  |
| 14 | 2 | 12 | 13 | 2 | 11 | 4973.9917 | 4973.9934 | -0.0017 |
| 14 | 1 | 13 | 13 | 1 | 12 | 4984.8729 | 4984.8769 | -0.0040 |
| 14 | 1 | 14 | 13 | 0 | 13 | 5099.6831 | 5099.6817 | 0.0014  |

|    |   |    |    |   |    |           |           |         |
|----|---|----|----|---|----|-----------|-----------|---------|
| 15 | 1 | 15 | 14 | 1 | 14 | 5181.0278 | 5181.0315 | -0.0037 |
| 9  | 2 | 8  | 8  | 1 | 8  | 5213.2255 | 5213.2192 | 0.0063  |
| 9  | 2 | 7  | 8  | 1 | 8  | 5260.1966 | 5260.1965 | 0.0001  |
| 15 | 2 | 14 | 14 | 2 | 13 | 5266.3924 | 5266.4004 | -0.0080 |
| 15 | 3 | 13 | 14 | 3 | 12 | 5286.4192 | 5286.4179 | 0.0013  |
| 15 | 3 | 12 | 14 | 3 | 11 | 5293.6238 | 5293.6114 | 0.0124  |
| 15 | 1 | 14 | 14 | 1 | 13 | 5337.3434 | 5337.3495 | -0.0061 |
| 15 | 1 | 15 | 14 | 0 | 14 | 5410.4503 | 5410.4403 | 0.0100  |
| 16 | 1 | 16 | 15 | 1 | 15 | 5524.4023 | 5524.4137 | -0.0114 |
| 16 | 0 | 16 | 15 | 0 | 15 | 5552.2682 | 5552.2684 | -0.0002 |
| 16 | 2 | 15 | 15 | 2 | 14 | 5615.4871 | 5615.4885 | -0.0014 |
| 16 | 6 | 11 | 15 | 6 | 10 | 5634.3852 | 5634.3829 | 0.0023  |
| 16 | 6 | 10 | 15 | 6 | 9  | 5634.3852 | 5634.3830 | 0.0022  |
| 16 | 3 | 14 | 15 | 3 | 13 | 5639.2451 | 5639.2456 | -0.0005 |
| 16 | 3 | 13 | 15 | 3 | 12 | 5649.1019 | 5649.1021 | -0.0002 |
| 10 | 2 | 8  | 9  | 1 | 9  | 5684.3788 | 5684.3798 | -0.0010 |
| 16 | 1 | 15 | 15 | 1 | 14 | 5688.9479 | 5688.9508 | -0.0029 |
| 17 | 0 | 17 | 16 | 0 | 16 | 5892.5752 | 5892.5838 | -0.0086 |
| 17 | 2 | 16 | 16 | 2 | 15 | 5964.2032 | 5964.2065 | -0.0033 |
| 17 | 4 | 14 | 16 | 4 | 13 | 5991.1179 | 5991.1135 | 0.0044  |
| 17 | 4 | 13 | 16 | 4 | 12 | 5991.7468 | 5991.7460 | 0.0008  |
| 17 | 3 | 15 | 16 | 3 | 14 | 5992.0254 | 5992.0261 | -0.0007 |
| 17 | 3 | 14 | 16 | 3 | 13 | 6005.2272 | 6005.2326 | -0.0054 |
| 18 | 4 | 15 | 17 | 4 | 14 | 6344.3496 | 6344.3430 | 0.0066  |
| 18 | 3 | 16 | 17 | 3 | 15 | 6344.7349 | 6344.7270 | 0.0079  |
| 18 | 4 | 14 | 17 | 4 | 13 | 6345.2928 | 6345.2874 | 0.0054  |
| 18 | 1 | 18 | 17 | 0 | 17 | 6356.3859 | 6356.3776 | 0.0083  |
| 19 | 9 | 10 | 18 | 9 | 9  | 6689.1961 | 6689.2021 | -0.0060 |
| 19 | 9 | 11 | 18 | 9 | 10 | 6689.1961 | 6689.2021 | -0.0060 |
| 19 | 8 | 12 | 18 | 8 | 11 | 6689.7857 | 6689.7875 | -0.0018 |
| 19 | 8 | 11 | 18 | 8 | 10 | 6689.7857 | 6689.7875 | -0.0018 |
| 19 | 6 | 13 | 18 | 6 | 12 | 6691.9395 | 6691.9370 | 0.0025  |
| 19 | 6 | 14 | 18 | 6 | 13 | 6691.9395 | 6691.9363 | 0.0032  |
| 19 | 3 | 17 | 18 | 3 | 16 | 6697.3056 | 6697.3141 | -0.0085 |
| 19 | 4 | 16 | 18 | 4 | 15 | 6697.6859 | 6697.6806 | 0.0053  |
| 19 | 4 | 15 | 18 | 4 | 14 | 6699.0620 | 6699.0584 | 0.0036  |

**Table S19.** Rotational transition frequencies of the **PFPT<sub>g</sub>+PFPT<sub>g</sub>** homodimer.

| $J'$ | $K_a'$ | $K_c'$ | $J''$ | $K_a''$ | $K_c''$ | Obs/ MHz | Cal/ MHz | Obs - Cal/ MHz |
|------|--------|--------|-------|---------|---------|----------|----------|----------------|
|------|--------|--------|-------|---------|---------|----------|----------|----------------|



|   |   |   |   |   |   |           |           |         |
|---|---|---|---|---|---|-----------|-----------|---------|
| 5 | 2 | 4 | 4 | 2 | 3 | 1822.8436 | 1822.8441 | -0.0005 |
| 5 | 4 | 1 | 4 | 4 | 0 | 1824.1194 | 1824.1191 | 0.0003  |
| 5 | 4 | 2 | 4 | 4 | 1 | 1824.1194 | 1824.1188 | 0.0006  |
| 5 | 3 | 3 | 4 | 3 | 2 | 1824.4157 | 1824.4158 | -0.0001 |
| 5 | 3 | 2 | 4 | 3 | 1 | 1824.4879 | 1824.4866 | 0.0013  |
| 5 | 2 | 3 | 4 | 2 | 2 | 1828.4627 | 1828.4626 | 0.0001  |
| 6 | 1 | 6 | 5 | 1 | 5 | 2141.6195 | 2141.6198 | -0.0003 |
| 6 | 0 | 6 | 5 | 0 | 5 | 2178.3675 | 2178.3682 | -0.0007 |
| 6 | 2 | 5 | 5 | 2 | 4 | 2186.8803 | 2186.8807 | -0.0004 |
| 6 | 5 | 2 | 5 | 5 | 1 | 2188.9004 | 2188.8983 | 0.0021  |
| 6 | 5 | 1 | 5 | 5 | 0 | 2188.9004 | 2188.8983 | 0.0021  |
| 6 | 4 | 3 | 5 | 4 | 2 | 2189.1351 | 2189.1346 | 0.0005  |
| 6 | 4 | 2 | 5 | 4 | 1 | 2189.1351 | 2189.1358 | -0.0007 |
| 6 | 3 | 4 | 5 | 3 | 3 | 2189.6225 | 2189.6216 | 0.0009  |
| 6 | 3 | 3 | 5 | 3 | 2 | 2189.8112 | 2189.8101 | 0.0011  |
| 6 | 2 | 4 | 5 | 2 | 3 | 2196.6552 | 2196.6537 | 0.0015  |
| 6 | 1 | 5 | 5 | 1 | 4 | 2230.1466 | 2230.1482 | -0.0016 |
| 7 | 1 | 7 | 6 | 1 | 6 | 2497.5667 | 2497.5675 | -0.0008 |
| 7 | 0 | 7 | 6 | 0 | 6 | 2537.3250 | 2537.3231 | 0.0019  |
| 7 | 2 | 6 | 6 | 2 | 5 | 2550.6263 | 2550.6278 | -0.0015 |
| 7 | 6 | 1 | 6 | 6 | 0 | 2553.6851 | 2553.6863 | -0.0012 |
| 7 | 6 | 2 | 6 | 6 | 1 | 2553.6851 | 2553.6863 | -0.0012 |
| 7 | 5 | 3 | 6 | 5 | 2 | 2553.8733 | 2553.8729 | 0.0004  |
| 7 | 5 | 2 | 6 | 5 | 1 | 2553.8733 | 2553.8729 | 0.0004  |
| 7 | 4 | 4 | 6 | 4 | 3 | 2554.255  | 2554.2545 | 0.0005  |
| 7 | 4 | 3 | 6 | 4 | 2 | 2554.2585 | 2554.2585 | 0.0000  |
| 7 | 3 | 5 | 6 | 3 | 4 | 2554.9762 | 2554.9738 | 0.0024  |
| 7 | 3 | 4 | 6 | 3 | 3 | 2555.3958 | 2555.3974 | -0.0016 |
| 7 | 2 | 5 | 6 | 2 | 4 | 2566.1109 | 2566.1129 | -0.0020 |
| 7 | 1 | 6 | 6 | 1 | 5 | 2600.6397 | 2600.6418 | -0.0021 |
| 8 | 1 | 8 | 7 | 1 | 7 | 2853.1032 | 2853.1033 | -0.0001 |
| 8 | 0 | 8 | 7 | 0 | 7 | 2894.5688 | 2894.5691 | -0.0003 |
| 8 | 2 | 7 | 7 | 2 | 6 | 2914.0370 | 2914.0381 | -0.0011 |
| 8 | 7 | 2 | 7 | 7 | 1 | 2918.4797 | 2918.4803 | -0.0006 |
| 8 | 7 | 1 | 7 | 7 | 0 | 2918.4797 | 2918.4803 | -0.0006 |
| 8 | 6 | 3 | 7 | 6 | 2 | 2918.6342 | 2918.6332 | 0.0010  |
| 8 | 6 | 2 | 7 | 6 | 1 | 2918.6342 | 2918.6332 | 0.0010  |
| 8 | 5 | 4 | 7 | 5 | 3 | 2918.9207 | 2918.9204 | 0.0003  |
| 8 | 5 | 3 | 7 | 5 | 2 | 2918.9207 | 2918.9205 | 0.0002  |
| 8 | 4 | 5 | 7 | 4 | 4 | 2919.4943 | 2919.4949 | -0.0006 |

|    |   |    |    |   |    |           |           |         |
|----|---|----|----|---|----|-----------|-----------|---------|
| 8  | 4 | 4  | 7  | 4 | 3  | 2919.5063 | 2919.5059 | 0.0004  |
| 8  | 3 | 6  | 7  | 3 | 5  | 2920.4719 | 2920.4735 | -0.0016 |
| 8  | 3 | 5  | 7  | 3 | 4  | 2921.3175 | 2921.3186 | -0.0011 |
| 15 | 2 | 13 | 14 | 3 | 11 | 2927.4618 | 2927.4623 | -0.0005 |
| 9  | 3 | 6  | 9  | 2 | 8  | 2930.1817 | 2930.1821 | -0.0004 |
| 8  | 2 | 6  | 7  | 2 | 5  | 2936.9284 | 2936.9303 | -0.0019 |
| 8  | 1 | 7  | 7  | 1 | 6  | 2970.5357 | 2970.5344 | 0.0013  |
| 16 | 1 | 16 | 15 | 2 | 14 | 3021.1349 | 3021.1345 | 0.0004  |
| 13 | 3 | 10 | 13 | 2 | 12 | 3026.7665 | 3026.7665 | 0.0000  |
| 4  | 2 | 2  | 3  | 1 | 2  | 3159.8280 | 3159.8278 | 0.0002  |
| 9  | 1 | 9  | 8  | 1 | 8  | 3208.1987 | 3208.1982 | 0.0006  |
| 4  | 2 | 3  | 3  | 1 | 3  | 3244.3218 | 3244.3212 | 0.0006  |
| 9  | 0 | 9  | 8  | 0 | 8  | 3250.0499 | 3250.0510 | -0.0011 |
| 9  | 2 | 8  | 8  | 2 | 7  | 3277.0653 | 3277.0649 | 0.0004  |
| 9  | 8 | 1  | 8  | 8 | 0  | 3283.2802 | 3283.2796 | 0.0006  |
| 9  | 8 | 2  | 8  | 8 | 1  | 3283.2802 | 3283.2796 | 0.0006  |
| 9  | 7 | 2  | 8  | 7 | 1  | 3283.4077 | 3283.4062 | 0.0015  |
| 9  | 7 | 3  | 8  | 7 | 2  | 3283.4077 | 3283.4062 | 0.0015  |
| 9  | 6 | 4  | 8  | 6 | 3  | 3283.6342 | 3283.6339 | 0.0003  |
| 9  | 6 | 3  | 8  | 6 | 2  | 3283.6342 | 3283.6339 | 0.0003  |
| 9  | 5 | 5  | 8  | 5 | 4  | 3284.0502 | 3284.0514 | -0.0012 |
| 9  | 5 | 4  | 8  | 5 | 3  | 3284.0502 | 3284.0516 | -0.0014 |
| 9  | 4 | 6  | 8  | 4 | 5  | 3284.8709 | 3284.8716 | -0.0007 |
| 9  | 4 | 5  | 8  | 4 | 4  | 3284.8979 | 3284.8980 | -0.0001 |
| 9  | 3 | 7  | 8  | 3 | 6  | 3286.1118 | 3286.1117 | 0.0001  |
| 9  | 3 | 6  | 8  | 3 | 5  | 3287.6562 | 3287.6558 | 0.0004  |
| 9  | 2 | 7  | 8  | 2 | 6  | 3309.1090 | 3309.1091 | -0.0001 |
| 9  | 1 | 8  | 8  | 1 | 7  | 3339.7042 | 3339.7058 | -0.0016 |
| 7  | 1 | 6  | 6  | 0 | 6  | 3351.5649 | 3351.5647 | 0.0002  |
| 5  | 2 | 3  | 4  | 1 | 3  | 3500.5076 | 3500.5096 | -0.0020 |
| 10 | 1 | 10 | 9  | 1 | 9  | 3562.8352 | 3562.8333 | 0.0019  |
| 10 | 0 | 10 | 9  | 0 | 9  | 3603.8130 | 3603.8148 | -0.0018 |
| 5  | 2 | 4  | 4  | 1 | 4  | 3638.5136 | 3638.5136 | 0.0000  |
| 10 | 2 | 9  | 9  | 2 | 8  | 3639.6630 | 3639.6631 | -0.0001 |
| 10 | 8 | 2  | 9  | 8 | 1  | 3648.1890 | 3648.1879 | 0.0011  |
| 10 | 8 | 3  | 9  | 8 | 2  | 3648.1890 | 3648.1879 | 0.0011  |
| 10 | 7 | 4  | 9  | 7 | 3  | 3648.3757 | 3648.3729 | 0.0028  |
| 10 | 7 | 3  | 9  | 7 | 2  | 3648.3757 | 3648.3729 | 0.0028  |
| 10 | 6 | 5  | 9  | 6 | 4  | 3648.6980 | 3648.6951 | 0.0029  |
| 10 | 6 | 4  | 9  | 6 | 3  | 3648.6980 | 3648.6952 | 0.0028  |

|    |    |    |    |    |    |           |           |         |
|----|----|----|----|----|----|-----------|-----------|---------|
| 10 | 5  | 5  | 9  | 5  | 4  | 3649.2760 | 3649.2768 | -0.0008 |
| 10 | 5  | 6  | 9  | 5  | 5  | 3649.2760 | 3649.2762 | -0.0002 |
| 10 | 4  | 7  | 9  | 4  | 6  | 3650.4003 | 3650.3990 | 0.0013  |
| 10 | 4  | 6  | 9  | 4  | 5  | 3650.4583 | 3650.4560 | 0.0023  |
| 10 | 3  | 8  | 9  | 3  | 7  | 3651.8706 | 3651.8696 | 0.0010  |
| 10 | 3  | 7  | 9  | 3  | 6  | 3654.5042 | 3654.5038 | 0.0004  |
| 10 | 2  | 8  | 9  | 2  | 7  | 3682.5520 | 3682.5497 | 0.0023  |
| 10 | 1  | 9  | 9  | 1  | 8  | 3708.0238 | 3708.0229 | 0.0009  |
| 6  | 2  | 4  | 5  | 1  | 4  | 3838.0031 | 3838.0014 | 0.0016  |
| 11 | 1  | 11 | 10 | 1  | 10 | 3917.0002 | 3917.0003 | -0.0001 |
| 11 | 0  | 11 | 10 | 0  | 10 | 3956.0112 | 3956.0086 | 0.0026  |
| 3  | 3  | 0  | 2  | 2  | 0  | 3995.9802 | 3995.9789 | 0.0013  |
| 3  | 3  | 1  | 2  | 2  | 1  | 3996.2577 | 3996.2581 | -0.0004 |
| 11 | 2  | 10 | 10 | 2  | 9  | 4001.7870 | 4001.7890 | -0.0020 |
| 11 | 9  | 3  | 10 | 9  | 2  | 4012.9763 | 4012.9768 | -0.0005 |
| 11 | 9  | 2  | 10 | 9  | 1  | 4012.9763 | 4012.9768 | -0.0005 |
| 11 | 8  | 4  | 10 | 8  | 3  | 4013.1284 | 4013.1276 | 0.0008  |
| 11 | 8  | 3  | 10 | 8  | 2  | 4013.1284 | 4013.1276 | 0.0008  |
| 11 | 7  | 4  | 10 | 7  | 3  | 4013.3843 | 4013.3850 | -0.0007 |
| 11 | 7  | 5  | 10 | 7  | 4  | 4013.3843 | 4013.3850 | -0.0007 |
| 11 | 6  | 6  | 10 | 6  | 5  | 4013.8249 | 4013.8237 | 0.0012  |
| 11 | 6  | 5  | 10 | 6  | 4  | 4013.8249 | 4013.8237 | 0.0012  |
| 11 | 5  | 6  | 10 | 5  | 5  | 4014.6054 | 4014.6067 | -0.0013 |
| 11 | 5  | 7  | 10 | 5  | 6  | 4014.6054 | 4014.6052 | 0.0002  |
| 11 | 4  | 8  | 10 | 4  | 7  | 4016.0887 | 4016.0898 | -0.0011 |
| 11 | 4  | 7  | 10 | 4  | 6  | 4016.2014 | 4016.2037 | -0.0023 |
| 11 | 3  | 9  | 10 | 3  | 8  | 4017.7180 | 4017.7179 | 0.0001  |
| 11 | 3  | 8  | 10 | 3  | 7  | 4021.9712 | 4021.9706 | 0.0006  |
| 11 | 2  | 9  | 10 | 2  | 8  | 4057.0478 | 4057.0483 | -0.0005 |
| 11 | 1  | 10 | 10 | 1  | 9  | 4075.3389 | 4075.3396 | -0.0007 |
| 7  | 2  | 5  | 6  | 1  | 5  | 4173.9641 | 4173.9661 | -0.0020 |
| 18 | 0  | 18 | 17 | 1  | 16 | 4183.4154 | 4183.4165 | -0.0011 |
| 9  | 1  | 8  | 8  | 0  | 8  | 4229.9121 | 4229.9126 | -0.0005 |
| 12 | 1  | 12 | 11 | 1  | 11 | 4270.7003 | 4270.7002 | 0.0001  |
| 12 | 0  | 12 | 11 | 0  | 11 | 4306.8637 | 4306.865  | -0.0013 |
| 4  | 3  | 1  | 3  | 2  | 1  | 4360.1226 | 4360.1229 | -0.0003 |
| 4  | 3  | 2  | 3  | 2  | 2  | 4361.5127 | 4361.5112 | 0.0015  |
| 12 | 2  | 11 | 11 | 2  | 10 | 4363.3990 | 4363.4010 | -0.0020 |
| 12 | 10 | 2  | 11 | 10 | 1  | 4377.7723 | 4377.7722 | 0.0001  |
| 12 | 10 | 3  | 11 | 10 | 2  | 4377.7723 | 4377.7722 | 0.0001  |

|    |   |    |    |   |    |           |           |         |
|----|---|----|----|---|----|-----------|-----------|---------|
| 12 | 9 | 4  | 11 | 9 | 3  | 4377.8925 | 4377.8934 | -0.0009 |
| 12 | 9 | 3  | 11 | 9 | 2  | 4377.8925 | 4377.8934 | -0.0009 |
| 12 | 8 | 4  | 11 | 8 | 3  | 4378.1018 | 4378.1017 | 0.0001  |
| 12 | 8 | 5  | 11 | 8 | 4  | 4378.1018 | 4378.1017 | 0.0001  |
| 12 | 7 | 6  | 11 | 7 | 5  | 4378.4461 | 4378.4469 | -0.0008 |
| 12 | 7 | 5  | 11 | 7 | 4  | 4378.4461 | 4378.4469 | -0.0008 |
| 12 | 6 | 7  | 11 | 6 | 6  | 4379.0253 | 4379.0262 | -0.0009 |
| 12 | 6 | 6  | 11 | 6 | 5  | 4379.0253 | 4379.0262 | -0.0009 |
| 12 | 5 | 8  | 11 | 5 | 7  | 4380.0486 | 4380.0488 | -0.0002 |
| 12 | 5 | 7  | 11 | 5 | 6  | 4380.0519 | 4380.0522 | -0.0003 |
| 12 | 4 | 9  | 11 | 4 | 8  | 4381.9559 | 4381.9549 | 0.0010  |
| 12 | 4 | 8  | 11 | 4 | 7  | 4382.1669 | 4382.1677 | -0.0008 |
| 12 | 3 | 10 | 11 | 3 | 9  | 4383.6180 | 4383.6179 | 0.0001  |
| 12 | 3 | 9  | 11 | 3 | 8  | 4390.1780 | 4390.1759 | 0.0021  |
| 16 | 1 | 15 | 15 | 2 | 13 | 4391.4757 | 4391.4765 | -0.0008 |
| 12 | 2 | 10 | 11 | 2 | 9  | 4432.3136 | 4432.3132 | 0.0004  |
| 12 | 1 | 11 | 11 | 1 | 10 | 4441.4963 | 4441.4974 | -0.0011 |
| 8  | 2 | 6  | 7  | 1 | 6  | 4510.2555 | 4510.2545 | 0.0010  |
| 13 | 1 | 13 | 12 | 1 | 12 | 4623.9424 | 4623.9434 | -0.0010 |
| 13 | 0 | 13 | 12 | 0 | 12 | 4656.6675 | 4656.6687 | -0.0012 |
| 10 | 1 | 9  | 9  | 0 | 9  | 4687.8833 | 4687.8846 | -0.0013 |
| 5  | 3 | 2  | 4  | 2 | 2  | 4723.2245 | 4723.2250 | -0.0005 |
| 13 | 2 | 12 | 12 | 2 | 11 | 4724.4609 | 4724.4608 | 0.0001  |
| 5  | 3 | 3  | 4  | 2 | 3  | 4727.3605 | 4727.3614 | -0.0009 |
| 13 | 9 | 4  | 12 | 9 | 3  | 4742.8375 | 4742.8363 | 0.0012  |
| 13 | 9 | 5  | 12 | 9 | 4  | 4742.8375 | 4742.8363 | 0.0012  |
| 13 | 8 | 5  | 12 | 8 | 4  | 4743.1125 | 4743.1135 | -0.0010 |
| 13 | 8 | 6  | 12 | 8 | 5  | 4743.1125 | 4743.1135 | -0.0010 |
| 13 | 7 | 6  | 12 | 7 | 5  | 4743.5626 | 4743.5634 | -0.0008 |
| 13 | 7 | 7  | 12 | 7 | 6  | 4743.5626 | 4743.5634 | -0.0008 |
| 13 | 6 | 8  | 12 | 6 | 7  | 4744.3120 | 4744.3095 | 0.0025  |
| 13 | 6 | 7  | 12 | 6 | 6  | 4744.3120 | 4744.3095 | 0.0025  |
| 13 | 5 | 9  | 12 | 5 | 8  | 4745.6168 | 4745.6172 | -0.0004 |
| 13 | 5 | 8  | 12 | 5 | 7  | 4745.6243 | 4745.6244 | -0.0001 |
| 13 | 4 | 10 | 12 | 4 | 9  | 4748.0020 | 4748.0017 | 0.0003  |
| 13 | 4 | 9  | 12 | 4 | 8  | 4748.3782 | 4748.3789 | -0.0007 |
| 13 | 3 | 11 | 12 | 3 | 10 | 4749.5225 | 4749.5217 | 0.0008  |
| 13 | 3 | 10 | 12 | 3 | 9  | 4759.2486 | 4759.2480 | 0.0006  |
| 13 | 1 | 12 | 12 | 1 | 11 | 4806.3295 | 4806.3295 | 0.0000  |
| 13 | 2 | 11 | 12 | 2 | 10 | 4807.9965 | 4807.9968 | -0.0003 |

|    |    |    |    |    |    |           |           |         |
|----|----|----|----|----|----|-----------|-----------|---------|
| 9  | 2  | 7  | 8  | 1  | 7  | 4848.8277 | 4848.8292 | -0.0015 |
| 8  | 2  | 7  | 7  | 1  | 7  | 4865.5748 | 4865.5743 | 0.0005  |
| 14 | 1  | 14 | 13 | 1  | 13 | 4976.7475 | 4976.7480 | -0.0005 |
| 14 | 0  | 14 | 13 | 0  | 13 | 5005.7163 | 5005.7171 | -0.0008 |
| 6  | 3  | 3  | 5  | 2  | 3  | 5084.5730 | 5084.5726 | 0.0004  |
| 14 | 2  | 13 | 13 | 2  | 12 | 5084.9336 | 5084.9333 | 0.0003  |
| 6  | 3  | 4  | 5  | 2  | 4  | 5094.1386 | 5094.1389 | -0.0003 |
| 14 | 11 | 4  | 13 | 11 | 3  | 5107.4497 | 5107.4508 | -0.0011 |
| 14 | 11 | 3  | 13 | 11 | 2  | 5107.4497 | 5107.4508 | -0.0011 |
| 14 | 10 | 5  | 13 | 10 | 4  | 5107.5854 | 5107.5838 | 0.0016  |
| 14 | 10 | 4  | 13 | 10 | 3  | 5107.5854 | 5107.5838 | 0.0016  |
| 14 | 9  | 5  | 13 | 9  | 4  | 5107.8094 | 5107.8074 | 0.0020  |
| 14 | 9  | 6  | 13 | 9  | 5  | 5107.8094 | 5107.8074 | 0.0020  |
| 14 | 8  | 7  | 13 | 8  | 6  | 5108.1642 | 5108.1660 | -0.0018 |
| 14 | 8  | 6  | 13 | 8  | 5  | 5108.1642 | 5108.1660 | -0.0018 |
| 14 | 7  | 8  | 13 | 7  | 7  | 5108.7385 | 5108.7388 | -0.0003 |
| 14 | 7  | 7  | 13 | 7  | 6  | 5108.7385 | 5108.7388 | -0.0003 |
| 14 | 6  | 9  | 13 | 6  | 8  | 5109.6801 | 5109.6803 | -0.0002 |
| 14 | 6  | 8  | 13 | 6  | 7  | 5109.6801 | 5109.6805 | -0.0004 |
| 14 | 5  | 10 | 13 | 5  | 9  | 5111.3201 | 5111.3206 | -0.0005 |
| 14 | 5  | 9  | 13 | 5  | 8  | 5111.3353 | 5111.3350 | 0.0003  |
| 14 | 4  | 11 | 13 | 4  | 10 | 5114.2349 | 5114.2347 | 0.0002  |
| 14 | 4  | 10 | 13 | 4  | 9  | 5114.8733 | 5114.8730 | 0.0003  |
| 14 | 3  | 12 | 13 | 3  | 11 | 5115.3742 | 5115.3739 | 0.0003  |
| 14 | 3  | 11 | 13 | 3  | 10 | 5129.3173 | 5129.3178 | -0.0005 |
| 11 | 1  | 10 | 10 | 0  | 10 | 5159.4092 | 5159.4093 | -0.0001 |
| 14 | 1  | 13 | 13 | 1  | 12 | 5169.6651 | 5169.6658 | -0.0007 |
| 14 | 2  | 12 | 13 | 2  | 11 | 5183.7346 | 5183.7338 | 0.0008  |
| 10 | 2  | 8  | 9  | 1  | 8  | 5191.6753 | 5191.6731 | 0.0022  |
| 15 | 1  | 15 | 14 | 1  | 14 | 5329.1379 | 5329.1384 | -0.0005 |
| 15 | 0  | 15 | 14 | 0  | 14 | 5354.2852 | 5354.2844 | 0.0008  |
| 7  | 3  | 4  | 6  | 2  | 4  | 5443.3158 | 5443.3163 | -0.0005 |
| 15 | 2  | 14 | 14 | 2  | 13 | 5444.7865 | 5444.7880 | -0.0015 |
| 7  | 3  | 5  | 6  | 2  | 5  | 5462.2312 | 5462.2320 | -0.0008 |
| 15 | 12 | 4  | 14 | 12 | 3  | 5472.2411 | 5472.2408 | 0.0003  |
| 15 | 12 | 3  | 14 | 12 | 2  | 5472.2411 | 5472.2408 | 0.0003  |
| 15 | 11 | 5  | 14 | 11 | 4  | 5472.3403 | 5472.3418 | -0.0015 |
| 15 | 11 | 4  | 14 | 11 | 3  | 5472.3403 | 5472.3418 | -0.0015 |
| 15 | 10 | 5  | 14 | 10 | 4  | 5472.5189 | 5472.5205 | -0.0016 |
| 15 | 10 | 6  | 14 | 10 | 5  | 5472.5204 | 5472.5205 | 0.0000  |

|    |    |    |    |    |    |           |           |         |
|----|----|----|----|----|----|-----------|-----------|---------|
| 15 | 9  | 6  | 14 | 9  | 5  | 5472.8094 | 5472.8091 | 0.0003  |
| 15 | 9  | 7  | 14 | 9  | 6  | 5472.8094 | 5472.8091 | 0.0003  |
| 15 | 8  | 7  | 14 | 8  | 6  | 5473.2613 | 5473.2623 | -0.0010 |
| 15 | 8  | 8  | 14 | 8  | 7  | 5473.2613 | 5473.2623 | -0.0010 |
| 15 | 7  | 9  | 14 | 7  | 8  | 5473.9778 | 5473.9777 | 0.0001  |
| 15 | 7  | 8  | 14 | 7  | 7  | 5473.9778 | 5473.9777 | 0.0001  |
| 15 | 6  | 9  | 14 | 6  | 8  | 5475.1462 | 5475.1460 | 0.0002  |
| 15 | 6  | 10 | 14 | 6  | 9  | 5475.1462 | 5475.1455 | 0.0007  |
| 15 | 5  | 11 | 14 | 5  | 10 | 5477.1686 | 5477.1688 | -0.0002 |
| 15 | 5  | 10 | 14 | 5  | 9  | 5477.1960 | 5477.1961 | -0.0001 |
| 15 | 4  | 12 | 14 | 4  | 11 | 5480.6535 | 5480.6534 | 0.0001  |
| 15 | 3  | 13 | 14 | 3  | 12 | 5481.1119 | 5481.1130 | -0.0011 |
| 15 | 4  | 11 | 14 | 4  | 10 | 5481.6909 | 5481.6923 | -0.0014 |
| 15 | 3  | 12 | 14 | 3  | 11 | 5500.5079 | 5500.5086 | -0.0007 |
| 4  | 4  | 1  | 3  | 3  | 1  | 5521.5485 | 5521.5499 | -0.0014 |
| 4  | 4  | 0  | 3  | 3  | 0  | 5521.5485 | 5521.5466 | 0.0019  |
| 15 | 1  | 14 | 14 | 1  | 13 | 5531.3422 | 5531.3432 | -0.0010 |
| 11 | 2  | 9  | 10 | 1  | 9  | 5540.7002 | 5540.6984 | 0.0018  |
| 15 | 2  | 13 | 14 | 2  | 12 | 5559.1741 | 5559.1752 | -0.0011 |
| 16 | 1  | 16 | 15 | 1  | 15 | 5681.1423 | 5681.1440 | -0.0017 |
| 16 | 0  | 16 | 15 | 0  | 15 | 5702.5997 | 5702.5983 | 0.0014  |
| 8  | 3  | 5  | 7  | 2  | 5  | 5798.5214 | 5798.5221 | -0.0007 |
| 16 | 2  | 15 | 15 | 2  | 14 | 5803.9983 | 5803.9992 | -0.0009 |
| 8  | 3  | 6  | 7  | 2  | 6  | 5832.0764 | 5832.0776 | -0.0012 |
| 16 | 12 | 5  | 15 | 12 | 4  | 5837.1071 | 5837.1089 | -0.0018 |
| 16 | 12 | 4  | 15 | 12 | 3  | 5837.1071 | 5837.1089 | -0.0018 |
| 16 | 11 | 5  | 15 | 11 | 4  | 5837.2486 | 5837.2479 | 0.0007  |
| 16 | 11 | 6  | 15 | 11 | 5  | 5837.2486 | 5837.2479 | 0.0007  |
| 16 | 10 | 6  | 15 | 10 | 5  | 5837.4802 | 5837.4797 | 0.0005  |
| 16 | 10 | 7  | 15 | 10 | 6  | 5837.4802 | 5837.4797 | 0.0005  |
| 16 | 9  | 7  | 15 | 9  | 6  | 5837.8453 | 5837.8435 | 0.0018  |
| 16 | 9  | 8  | 15 | 9  | 7  | 5837.8453 | 5837.8435 | 0.0018  |
| 16 | 8  | 8  | 15 | 8  | 7  | 5838.4048 | 5838.4056 | -0.0008 |
| 16 | 8  | 9  | 15 | 8  | 8  | 5838.4048 | 5838.4056 | -0.0008 |
| 16 | 7  | 10 | 15 | 7  | 9  | 5839.2870 | 5839.2848 | 0.0022  |
| 16 | 7  | 9  | 15 | 7  | 8  | 5839.2870 | 5839.2848 | 0.0022  |
| 16 | 6  | 11 | 15 | 6  | 10 | 5840.7130 | 5840.7120 | 0.0010  |
| 16 | 6  | 10 | 15 | 6  | 9  | 5840.7130 | 5840.7129 | 0.0001  |
| 16 | 3  | 14 | 15 | 3  | 13 | 5846.6750 | 5846.6730 | 0.0020  |
| 16 | 4  | 13 | 15 | 4  | 12 | 5847.2521 | 5847.2525 | -0.0004 |

|    |    |    |    |    |    |           |           |         |
|----|----|----|----|----|----|-----------|-----------|---------|
| 16 | 4  | 12 | 15 | 4  | 11 | 5848.8853 | 5848.8867 | -0.0014 |
| 16 | 3  | 13 | 15 | 3  | 12 | 5872.9250 | 5872.9229 | 0.0021  |
| 16 | 1  | 15 | 15 | 1  | 14 | 5891.2177 | 5891.2184 | -0.0007 |
| 12 | 2  | 10 | 11 | 1  | 10 | 5897.6729 | 5897.6720 | 0.0009  |
| 16 | 2  | 14 | 15 | 2  | 13 | 5934.0113 | 5934.0115 | -0.0002 |
| 17 | 1  | 17 | 16 | 1  | 16 | 6032.7986 | 6032.7973 | 0.0013  |
| 17 | 0  | 17 | 16 | 0  | 16 | 6050.8291 | 6050.8296 | -0.0005 |
| 9  | 3  | 6  | 8  | 2  | 6  | 6149.2492 | 6149.2476 | 0.0016  |
| 17 | 2  | 16 | 16 | 2  | 15 | 6162.5472 | 6162.5475 | -0.0003 |
| 17 | 12 | 6  | 16 | 12 | 5  | 6201.9883 | 6201.9870 | 0.0013  |
| 17 | 12 | 5  | 16 | 12 | 4  | 6201.9883 | 6201.9870 | 0.0013  |
| 17 | 11 | 7  | 16 | 11 | 6  | 6202.1694 | 6202.1700 | -0.0006 |
| 17 | 11 | 6  | 16 | 11 | 5  | 6202.1694 | 6202.1700 | -0.0006 |
| 17 | 10 | 7  | 16 | 10 | 6  | 6202.4629 | 6202.4629 | 0.0000  |
| 17 | 10 | 8  | 16 | 10 | 7  | 6202.4629 | 6202.4629 | 0.0000  |
| 17 | 9  | 9  | 16 | 9  | 8  | 6202.9127 | 6202.9127 | 0.0000  |
| 17 | 9  | 8  | 16 | 9  | 7  | 6202.9127 | 6202.9127 | 0.0000  |
| 17 | 8  | 10 | 16 | 8  | 9  | 6203.5985 | 6203.5991 | -0.0006 |
| 17 | 8  | 9  | 16 | 8  | 8  | 6203.5985 | 6203.5991 | -0.0006 |
| 9  | 3  | 7  | 8  | 2  | 7  | 6204.1501 | 6204.1512 | -0.0011 |
| 17 | 7  | 11 | 16 | 7  | 10 | 6204.6644 | 6204.6645 | -0.0001 |
| 17 | 7  | 10 | 16 | 7  | 9  | 6204.6644 | 6204.6645 | -0.0001 |
| 17 | 6  | 11 | 16 | 6  | 10 | 6206.3871 | 6206.3883 | -0.0012 |
| 17 | 6  | 12 | 16 | 6  | 11 | 6206.3871 | 6206.3866 | 0.0005  |
| 17 | 5  | 13 | 16 | 5  | 12 | 6209.3369 | 6209.3370 | -0.0001 |
| 17 | 5  | 12 | 16 | 5  | 11 | 6209.4227 | 6209.4233 | -0.0006 |
| 17 | 3  | 15 | 16 | 3  | 14 | 6211.9850 | 6211.9851 | -0.0001 |
| 17 | 4  | 14 | 16 | 4  | 13 | 6214.0197 | 6214.0209 | -0.0012 |
| 17 | 4  | 13 | 16 | 4  | 12 | 6216.5146 | 6216.5151 | -0.0005 |
| 17 | 3  | 14 | 16 | 3  | 13 | 6246.6247 | 6246.6254 | -0.0007 |
| 17 | 1  | 16 | 16 | 1  | 15 | 6249.1865 | 6249.1853 | 0.0012  |
| 13 | 2  | 11 | 12 | 1  | 11 | 6264.1702 | 6264.1714 | -0.0012 |
| 17 | 2  | 15 | 16 | 2  | 14 | 6307.9791 | 6307.9804 | -0.0013 |
| 18 | 1  | 18 | 17 | 1  | 17 | 6384.1334 | 6384.1323 | 0.0011  |
| 18 | 0  | 18 | 17 | 0  | 17 | 6399.0951 | 6399.0936 | 0.0015  |
| 10 | 3  | 7  | 9  | 2  | 7  | 6494.6413 | 6494.6423 | -0.0010 |
| 18 | 2  | 17 | 17 | 2  | 16 | 6520.4192 | 6520.4197 | -0.0005 |
| 18 | 12 | 7  | 17 | 12 | 6  | 6566.8751 | 6566.8757 | -0.0006 |
| 18 | 12 | 6  | 17 | 12 | 5  | 6566.8751 | 6566.8757 | -0.0006 |
| 18 | 11 | 8  | 17 | 11 | 7  | 6567.1085 | 6567.1091 | -0.0006 |

|    |    |    |    |    |    |           |           |         |
|----|----|----|----|----|----|-----------|-----------|---------|
| 18 | 11 | 7  | 17 | 11 | 6  | 6567.1085 | 6567.1091 | -0.0006 |
| 18 | 10 | 9  | 17 | 10 | 8  | 6567.4715 | 6567.4716 | -0.0001 |
| 18 | 10 | 8  | 17 | 10 | 7  | 6567.4715 | 6567.4716 | -0.0001 |
| 18 | 9  | 10 | 17 | 9  | 9  | 6568.0189 | 6568.0190 | -0.0001 |
| 18 | 9  | 9  | 17 | 9  | 8  | 6568.0189 | 6568.0190 | -0.0001 |
| 18 | 8  | 10 | 17 | 8  | 9  | 6568.8446 | 6568.8458 | -0.0012 |
| 18 | 8  | 11 | 17 | 8  | 10 | 6568.8446 | 6568.8458 | -0.0012 |
| 18 | 7  | 12 | 17 | 7  | 11 | 6570.1215 | 6570.1215 | 0.0000  |
| 18 | 7  | 11 | 17 | 7  | 10 | 6570.1215 | 6570.1216 | -0.0001 |
| 18 | 6  | 13 | 17 | 6  | 12 | 6572.1759 | 6572.1762 | -0.0003 |
| 18 | 6  | 12 | 17 | 6  | 11 | 6572.1802 | 6572.1796 | 0.0006  |
| 18 | 5  | 14 | 17 | 5  | 13 | 6575.6748 | 6575.6740 | 0.0008  |
| 18 | 5  | 13 | 17 | 5  | 12 | 6575.8195 | 6575.8194 | 0.0001  |
| 18 | 3  | 16 | 17 | 3  | 15 | 6576.9806 | 6576.9801 | 0.0005  |
| 10 | 3  | 8  | 9  | 2  | 8  | 6578.9563 | 6578.9558 | 0.0005  |
| 18 | 4  | 15 | 17 | 4  | 14 | 6580.9413 | 6580.9408 | 0.0005  |
| 18 | 4  | 14 | 17 | 4  | 13 | 6584.6463 | 6584.6463 | 0.0000  |
| 18 | 1  | 17 | 17 | 1  | 16 | 6605.1925 | 6605.1926 | -0.0001 |
| 12 | 2  | 11 | 11 | 1  | 11 | 6606.3573 | 6606.3573 | 0.0000  |
| 18 | 3  | 15 | 17 | 3  | 14 | 6621.6229 | 6621.6238 | -0.0009 |
| 18 | 2  | 16 | 17 | 2  | 15 | 6680.8646 | 6680.8651 | -0.0005 |
| 19 | 1  | 19 | 18 | 1  | 18 | 6735.1836 | 6735.1835 | 0.0001  |
| 11 | 3  | 8  | 10 | 2  | 8  | 6834.0635 | 6834.0632 | 0.0003  |
| 19 | 2  | 18 | 18 | 2  | 17 | 6877.6103 | 6877.6098 | 0.0005  |
| 19 | 7  | 12 | 18 | 7  | 11 | 6935.6617 | 6935.6606 | 0.0011  |
| 19 | 7  | 13 | 18 | 7  | 12 | 6935.6617 | 6935.6605 | 0.0012  |
| 19 | 6  | 14 | 18 | 6  | 13 | 6938.0886 | 6938.0879 | 0.0007  |
| 19 | 6  | 13 | 18 | 6  | 12 | 6938.0938 | 6938.0940 | -0.0002 |
| 19 | 4  | 16 | 18 | 4  | 15 | 6947.9889 | 6947.9873 | 0.0016  |
| 19 | 4  | 15 | 18 | 4  | 14 | 6953.3603 | 6953.3602 | 0.0001  |
| 19 | 1  | 18 | 18 | 1  | 17 | 6959.2624 | 6959.2608 | 0.0016  |
| 19 | 3  | 16 | 18 | 3  | 15 | 6997.8517 | 6997.8521 | -0.0004 |
| 19 | 2  | 17 | 18 | 2  | 16 | 7052.4839 | 7052.4839 | 0.0000  |
| 20 | 3  | 18 | 19 | 3  | 17 | 7305.7473 | 7305.7469 | 0.0004  |



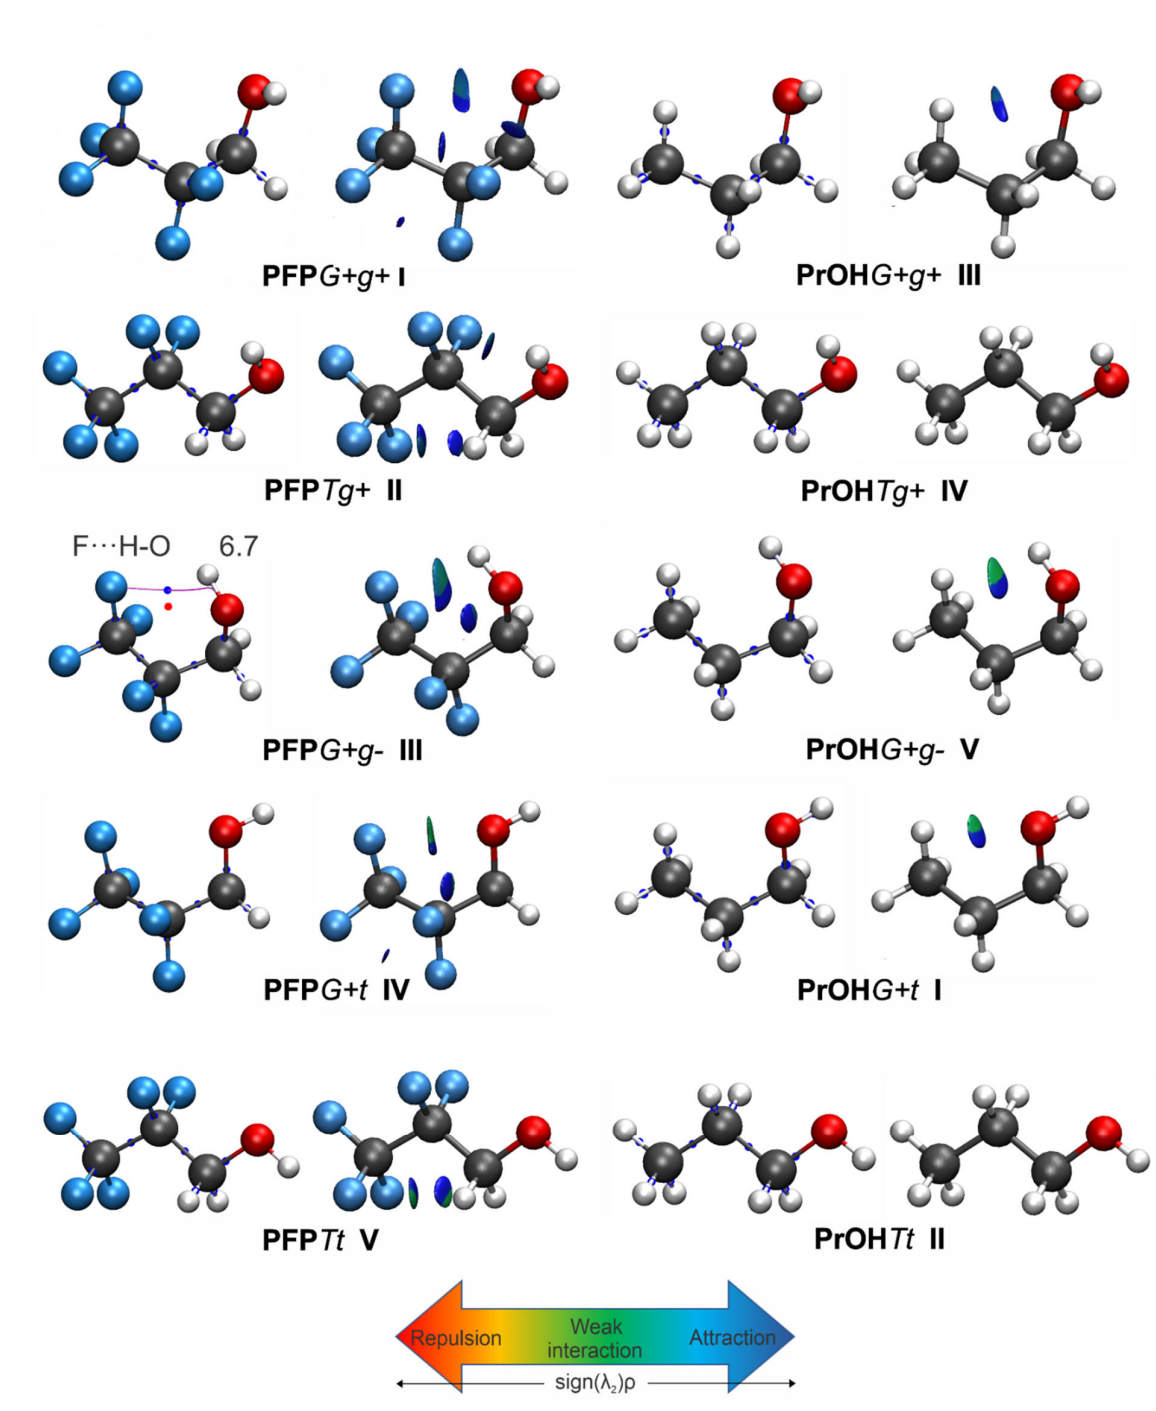

**Figure S4.** The intramolecular forces for all the non-covalent BCPs identified and non-covalent interaction analyses of the all possible PFP and PrOH monomers calculated at the B3LYP-D3(BJ)/def2-QZVP level of theory. The bond energy is in  $\text{kJmol}^{-1}$ . I to V indicate the relative stability with I being the most stable.

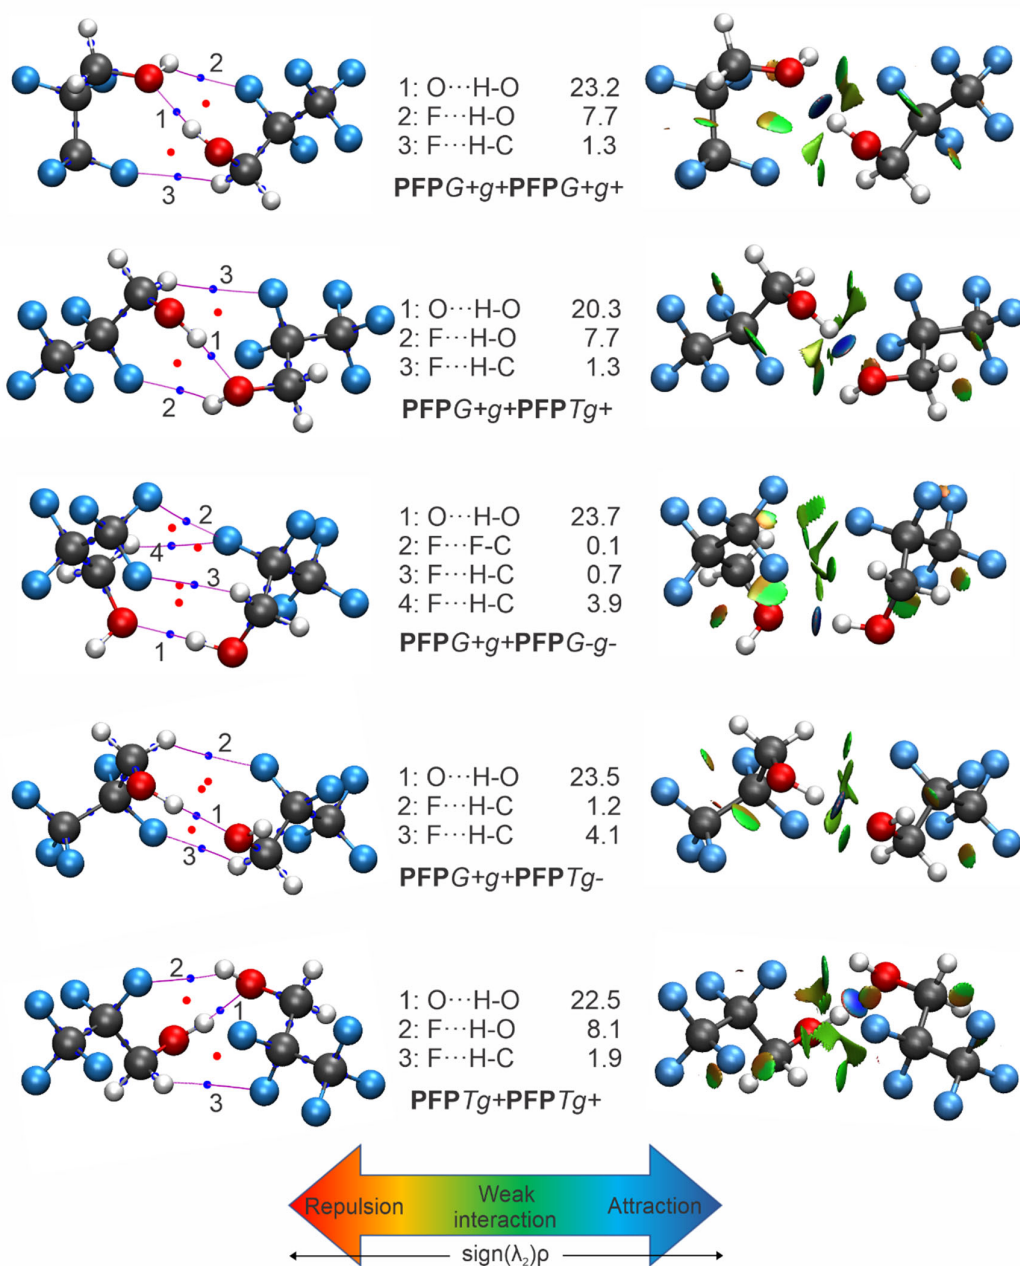

**Figure S5.** The intermolecular bond energies (in  $\text{kJmol}^{-1}$ ) for all the non-covalent BCPs identified and the NCI analyses of the five observed PFP homodimers calculated at the B3LYP-D3(BJ)/def2-QZVP level of theory.

Gaussian 16, Revision C.01, M. J. Frisch, G. W. Trucks, H. B. Schlegel, G. E. Scuseria, M. A. Robb, J. R. Cheeseman, G. Scalmani, V. Barone, G. A. Petersson, H. Nakatsuji, X. Li, M. Caricato, A. V. Marenich, J. Bloino, B. G. Janesko, R. Gomperts, B. Mennucci, H. P. Hratchian, J. V. Ortiz, A. F. Izmaylov, J. L. Sonnenberg, D. Williams-Young, F. Ding, F. Lipparini, F. Egidi, J. Goings, B. Peng, A. Petrone, T. Henderson, D. Ranasinghe, V. G. Zakrzewski, J. Gao, N. Rega, G. Zheng, W. Liang, M. Hada, M. Ehara, K. Toyota, R. Fukuda, J. Hasegawa, M. Ishida, T. Nakajima, Y. Honda, O. Kitao, H. Nakai, T. Vreven, K. Throssell, J. A. Montgomery, Jr., J. E. Peralta, F. Ogliaro, M. J. Bearpark, J. J. Heyd, E. N. Brothers, K. N. Kudin, V. N. Staroverov, T. A. Keith, R. Kobayashi, J. Normand, K. Raghavachari, A. P. Rendell, J. C. Burant, S. S. Iyengar, J. Tomasi, M. Cossi, J. M. Millam, M. Klene, C. Adamo, R. Cammi, J. W. Ochterski, R. L. Martin, K. Morokuma, O. Farkas, J. B. Foresman, and D. J. Fox, Gaussian, Inc., Wallingford CT, **2016**.
